# Supplementary material for: Physiological responses and antibiotic-degradation capacity of duckweed (Lemna aequinoctialis) exposed to streptomycin
Source: Front Plant Sci. 2022 Dec 2;13:1065199. doi: 10.3389/fpls.2022.1065199 (PMC9774486; doi:10.3389/fpls.2022.1065199)
Supplement: Supplementary file 1 [file Table_1.xlsx]

## Sheet: YNvsCK_deg_all
GeneID	YN_readcount	CK_readcount	log2FoldChange	pval	padj	Gene Length	NR GI	NR ID	NR Score	NR Evalue	NR Description	NT GI	NT ID	NT Score	NT Evalue	NT Description	KO ID	KO Name	KO Description	Http Link	Swissprot ID	Swissprot Score	Swissprot Evalue	Swissprot Description	PFAM ID	PFAM description	Gene Ontology Biological Pathway	BP Description	Gene Ontology Molecular Function	MF Description	Gene Ontology Cellular Component	CC Description	KOG ID	KOG Description
Cluster-3890.7585	67.9381	0.126641	8.98132	3.18019e-35	7.27372e-31	551	374412434	AEZ49175.1	332	1.3e-28	lipid transfer protein family protein [Wolffia australiana]	--	--	--	--	--	--	--	--	--	P14009	151	4.7e-09	14 kDa proline-rich protein DC2.15 OS=Daucus carota OX=4039 PE=2 SV=1	--	--	--	--	--	--	--	--	--	--
Cluster-3890.6164	200.804	3.35599	5.89962	3.35143e-29	3.83269e-25	601	--	--	--	--	--	--	--	--	--	--	--	--	--	--	--	--	--	--	PF09117//PF02976	MiAMP1//DNA mismatch repair enzyme MutH	GO:0045926//GO:0006952	negative regulation of growth//defense response	GO:0003677//GO:0004519	DNA binding//endonuclease activity	--	--	--	--
Cluster-3890.755	2.21137	134.585	-5.92244	1.38026e-28	1.05231e-24	2298	1371534727	PSS30772.1	1095	1.8e-116	Geraniol 8-hydroxylase [Actinidia chinensis var. chinensis]	JQ804980.1	JQ804980	46	8.72471e-13	Spirodela polyrhiza strain 7498 mitochondrion, complete genome	--	--	--	--	Q8VWZ7	1063	3.5e-114	Geraniol 8-hydroxylase OS=Catharanthus roseus OX=4058 GN=CYP76B6 PE=1 SV=1	PF00067	Cytochrome P450	GO:0055114	oxidation-reduction process	GO:0005506//GO:0020037//GO:0016705	iron ion binding//heme binding//oxidoreductase activity, acting on paired donors, with incorporation or reduction of molecular oxygen	--	--	--	--
Cluster-3890.5480	179.551	3.79923	5.55965	5.33455e-27	3.0503e-23	582	1035930418	OAY60004.1	144	8.4e-07	hypothetical protein MANES_01G078500 [Manihot esculenta]	--	--	--	--	--	--	--	--	--	P14009	123	8.7e-06	14 kDa proline-rich protein DC2.15 OS=Daucus carota OX=4039 PE=2 SV=1	--	--	--	--	--	--	--	--	--	--
Cluster-3890.1735	2.21137	92.8911	-5.38758	8.75163e-25	4.00334e-21	858	1276253064	PIN11370.1	946	1.3e-99	hypothetical protein CDL12_16028 [Handroanthus impetiginosus]	XM_020731289.1	XM_020731289	120	2.32331e-54	PREDICTED: Phalaenopsis equestris protein P21-like (LOC110029137), mRNA	--	--	--	--	P81370	898	1.8e-95	Thaumatin-like protein OS=Actinidia deliciosa OX=3627 GN=tlp PE=1 SV=2	--	--	--	--	--	--	--	--	--	--
Cluster-3890.9398	15.3567	404.998	-4.72027	1.91749e-22	7.30947e-19	638	--	--	--	--	--	CP019103.1	CP019103	73	2.28788e-28	Spirodela polyrhiza strain 9509 chromosome 11 sequence	--	--	--	--	--	--	--	--	PF00257	Dehydrin	GO:0009415	response to water	--	--	--	--	--	--
Cluster-3890.17069	0.429988	21.9722	-5.64983	4.88198e-20	1.59515e-16	976	1532911302	RRT71442.1	449	6.1e-42	hypothetical protein B296_00023198 [Ensete ventricosum]	--	--	--	--	--	--	--	--	--	Q8VYI1	408	1.3e-38	Sphinganine C4-monooxygenase 1 OS=Arabidopsis thaliana OX=3702 GN=SBH1 PE=1 SV=1	PF04116	Fatty acid hydroxylase superfamily	GO:0055114//GO:0008610	oxidation-reduction process//lipid biosynthetic process	GO:0005506//GO:0016491	iron ion binding//oxidoreductase activity	--	--	KOG0874	Sphingolipid hydroxylase
Cluster-3890.685	0.0614268	13.044	-7.55881	7.0716e-20	2.02177e-16	512	1315702424	PKU67026.1	168	1.2e-09	Defensin J1-2 [Dendrobium catenatum]	--	--	--	--	--	--	--	--	--	Q9FFP8	156	1.1e-09	Defensin-like protein 6 OS=Arabidopsis thaliana OX=3702 GN=PDF2.5 PE=3 SV=1	--	--	--	--	--	--	--	--	--	--
Cluster-3890.4353	23.6493	465.849	-4.29954	1.04167e-19	2.64724e-16	1757	1091666692	XP_018677912.1	1729	4.1e-190	PREDICTED: beta-amylase isoform X1 [Musa acuminata subsp. malaccensis]	XM_021868671.1	XM_021868671	115	2.91925e-51	PREDICTED: Chenopodium quinoa beta-amylase-like (LOC110691737), transcript variant X2, mRNA	--	--	--	--	O65015	1699	4.7e-188	Beta-amylase OS=Trifolium repens OX=3899 GN=BMY1 PE=2 SV=1	PF00986//PF01373	DNA gyrase B subunit, carboxyl terminus//Glycosyl hydrolase family 14	GO:0006265//GO:0005982//GO:0000272//GO:0005985	DNA topological change//starch metabolic process//polysaccharide catabolic process//sucrose metabolic process	GO:0003677//GO:0016161//GO:0005524//GO:0003918	DNA binding//beta-amylase activity//ATP binding//DNA topoisomerase type II (double strand cut, ATP-hydrolyzing) activity	--	--	--	--
Cluster-3890.13525	10.9954	0	10.4631	1.22791e-19	2.80848e-16	600	339716060	AEJ88277.1	218	2.3e-15	putative 14 kDa proline-rich protein DC2.15 precursor [Wolffia australiana]	--	--	--	--	--	--	--	--	--	P14009	172	1.9e-11	14 kDa proline-rich protein DC2.15 OS=Daucus carota OX=4039 PE=2 SV=1	--	--	--	--	--	--	--	--	--	--
Cluster-3890.15217	1.41282	33.5599	-4.56249	9.06011e-18	1.88384e-14	1430	1338467117	PON89122.1	1350	3e-146	Hopanoid-associated sugar epimerase [Trema orientale]	CP019097.1	CP019097	54	1.9233e-17	Spirodela polyrhiza strain 9509 chromosome 5 sequence	--	--	--	--	--	--	--	--	PF01118//PF00056//PF01370//PF01073//PF01113//PF02571//PF02826//PF03435	Semialdehyde dehydrogenase, NAD binding domain//lactate/malate dehydrogenase, NAD binding domain//NAD dependent epimerase/dehydratase family//3-beta hydroxysteroid dehydrogenase/isomerase family//Dihydrodipicolinate reductase, N-terminus//Precorrin-6x reductase CbiJ/CobK//D-isomer specific 2-hydroxyacid dehydrogenase, NAD binding domain//Saccharopine dehydrogenase NADP binding domain	GO:0008207//GO:0009236//GO:0008210//GO:0055114//GO:0006694//GO:0015994//GO:0008209//GO:0009085//GO:0009089	C21-steroid hormone metabolic process//cobalamin biosynthetic process//estrogen metabolic process//oxidation-reduction process//steroid biosynthetic process//chlorophyll metabolic process//androgen metabolic process//lysine biosynthetic process//lysine biosynthetic process via diaminopimelate	GO:0016491//GO:0050662//GO:0008839//GO:0003854//GO:0016994//GO:0016620//GO:0016616//GO:0051287//GO:0003824	oxidoreductase activity//obsolete coenzyme binding//4-hydroxy-tetrahydrodipicolinate reductase//3-beta-hydroxy-delta5-steroid dehydrogenase activity//precorrin-6A reductase activity//oxidoreductase activity, acting on the aldehyde or oxo group of donors, NAD or NADP as acceptor//oxidoreductase activity, acting on the CH-OH group of donors, NAD or NADP as acceptor//NAD binding//catalytic activity	--	--	--	--
Cluster-3890.5553	31.3891	1.32973	4.55298	1.0269e-17	1.95726e-14	936	1577028827	RZS26511.1	370	8.5e-33	hypothetical protein BHM03_00059861 [Ensete ventricosum]	--	--	--	--	--	--	--	--	--	Q9LM15	276	2.6e-23	Ethylene-responsive transcription factor RAP2-13 OS=Arabidopsis thaliana OX=3702 GN=RAP2-13 PE=1 SV=1	PF00847	AP2 domain	GO:0006355	regulation of transcription, DNA-templated	GO:0003700	DNA-binding transcription factor activity	GO:0005667	transcription regulator complex	--	--
Cluster-3890.16375	1.22854	28.4309	-4.52372	4.20351e-17	7.3956e-14	1853	1476587592	BBE08044.1	1068	1.9e-113	carotenoid cleavage dioxygenase 4 [Lilium formosanum x Lilium longiflorum]	CP019093.1	CP019093	73	6.86262e-28	Spirodela polyrhiza strain 9509 chromosome 1 sequence	K09840	NCED	9-cis-epoxycarotenoid dioxygenase	http://www.genome.jp/dbget-bin/www_bget?ko:K09840	Q6YVJ0	1027	4.2e-110	9-cis-epoxycarotenoid dioxygenase NCED1, chloroplastic OS=Oryza sativa subsp. japonica OX=39947 GN=NCED1 PE=2 SV=1	PF03055//PF02662//PF04911	Retinal pigment epithelial membrane protein//Methyl-viologen-reducing hydrogenase, delta subunit//ATP synthase j chain	GO:0015986//GO:0055114	ATP synthesis coupled proton transport//oxidation-reduction process	GO:0016702//GO:0015078	oxidoreductase activity, acting on single donors with incorporation of molecular oxygen, incorporation of two atoms of oxygen//proton transmembrane transporter activity	GO:0045263	proton-transporting ATP synthase complex, coupling factor F(o)	--	--
Cluster-3890.3338	17.1375	256.879	-3.90525	5.97674e-17	9.76428e-14	3680	695037095	XP_009406028.1	788	1.1e-80	PREDICTED: polyamine oxidase [Musa acuminata subsp. malaccensis]	--	--	--	--	--	K13366	MPAO, PAO1	polyamine oxidase	http://www.genome.jp/dbget-bin/www_bget?ko:K13366	A0A0P0XM10	717	7.3e-74	Polyamine oxidase 6 OS=Oryza sativa subsp. japonica OX=39947 GN=PAO6 PE=2 SV=1	PF01593//PF00098	Flavin containing amine oxidoreductase//Zinc knuckle	GO:0055114	oxidation-reduction process	GO:0008270//GO:0016491//GO:0003676	zinc ion binding//oxidoreductase activity//nucleic acid binding	--	--	KOG0029	Amine oxidase
Cluster-3890.13270	7.49407	0	9.9105	2.54925e-16	3.88709e-13	1256	1576975716	RZR73887.1	594	1.2e-58	hypothetical protein BHM03_00029239 [Ensete ventricosum]	--	--	--	--	--	--	--	--	--	Q8H199	522	1e-51	Cysteine-rich receptor-like protein kinase 14 OS=Arabidopsis thaliana OX=3702 GN=CRK14 PE=2 SV=2	PF00069//PF07714//PF02228	Protein kinase domain//Protein tyrosine and serine/threonine kinase//Major core protein p19	GO:0006468	protein phosphorylation	GO:0005198//GO:0004672//GO:0005524	structural molecule activity//protein kinase activity//ATP binding	GO:0019013	viral nucleocapsid	--	--
Cluster-3890.1955	11.6097	152.666	-3.71609	1.48239e-15	2.11908e-12	440	--	--	--	--	--	--	--	--	--	--	--	--	--	--	--	--	--	--	PF09117	MiAMP1	GO:0045926//GO:0006952	negative regulation of growth//defense response	--	--	--	--	--	--
Cluster-3890.9209	15.1724	0.633205	4.56573	4.12901e-15	5.55522e-12	1412	930809492	ALG05128.1	966	9.9e-102	cytochrome P450 [Sinopodophyllum hexandrum]	--	--	--	--	--	--	--	--	--	A0A068Q5V6	631	2.6e-64	Cytochrome P450 71AU50 OS=Prunus mume OX=102107 GN=CYP71AU50 PE=2 SV=1	PF00067	Cytochrome P450	GO:0055114	oxidation-reduction process	GO:0005506//GO:0020037//GO:0016705	iron ion binding//heme binding//oxidoreductase activity, acting on paired donors, with incorporation or reduction of molecular oxygen	--	--	--	--
Cluster-3890.11141	2.45707	36.6626	-3.89503	5.16793e-15	6.56671e-12	554	--	--	--	--	--	--	--	--	--	--	--	--	--	--	--	--	--	--	PF09117//PF09207	MiAMP1//Yeast killer toxin	GO:0009405//GO:0008219//GO:0045926//GO:0006952	pathogenesis//cell death//negative regulation of growth//defense response	--	--	GO:0005576	extracellular region	--	--
Cluster-3890.16774	2.76421	38.9693	-3.81363	1.05715e-14	1.27258e-11	1054	969999294	XP_015081960.1	917	3.6e-96	peroxidase 5-like [Solanum pennellii]	--	--	--	--	--	K00430	E1.11.1.7	peroxidase	http://www.genome.jp/dbget-bin/www_bget?ko:K00430	A7QEU4	710	1.4e-73	Peroxidase 5 OS=Vitis vinifera OX=29760 GN=GSVIVT00037159001 PE=1 SV=2	PF00141//PF06581	Peroxidase//Mad1 and Cdc20-bound-Mad2 binding	GO:0006804//GO:0006979//GO:0055114//GO:0007096	obsolete peroxidase reaction//response to oxidative stress//oxidation-reduction process//regulation of exit from mitosis	GO:0004601//GO:0020037	peroxidase activity//heme binding	GO:0005634	nucleus	--	--
Cluster-3890.13696	5.89697	0	9.56513	1.96936e-14	2.25216e-11	435	--	--	--	--	--	--	--	--	--	--	--	--	--	--	--	--	--	--	--	--	--	--	--	--	--	--	--	--
Cluster-3890.16315	4.29988	54.7671	-3.66854	2.16166e-14	2.35436e-11	788	976929070	KVI11935.1	381	3.8e-34	Mitochondrial inner membrane translocase subunit Tim17/Tim22/Tim23/peroxisomal protein PMP24 [Cynara cardunculus var. scolymus]	--	--	--	--	--	--	--	--	--	Q41050	267	2.4e-22	Outer envelope pore protein 16, chloroplastic OS=Pisum sativum OX=3888 GN=OEP16 PE=1 SV=1	PF05433//PF05818	Glycine zipper 2TM domain//Enterobacterial TraT complement resistance protein	GO:0046999	regulation of conjugation	--	--	GO:0019867	outer membrane	--	--
Cluster-3890.13553	1.04426	18.5529	-4.14097	3.41758e-14	3.55304e-11	587	--	--	--	--	--	--	--	--	--	--	--	--	--	--	--	--	--	--	--	--	--	--	--	--	--	--	--	--
Cluster-3890.16401	2.27279	30.8371	-3.75755	5.15457e-14	5.12589e-11	1242	901817494	KMZ71293.1	812	6.3e-84	GDSL esterase/lipase [Zostera marina]	--	--	--	--	--	--	--	--	--	Q9FIA1	589	1.7e-59	GDSL esterase/lipase At5g55050 OS=Arabidopsis thaliana OX=3702 GN=At5g55050 PE=2 SV=1	PF00657	GDSL-like Lipase/Acylhydrolase	--	--	GO:0016788	hydrolase activity, acting on ester bonds	--	--	--	--
Cluster-3890.5980	1.8428	25.7689	-3.8	7.12551e-14	6.79061e-11	467	548845330	ERN04795.1	139	2.6e-06	hypothetical protein AMTR_s00140p00096690 [Amborella trichopoda]	--	--	--	--	--	--	--	--	--	--	--	--	--	PF09117	MiAMP1	GO:0045926//GO:0006952	negative regulation of growth//defense response	--	--	--	--	--	--
Cluster-3890.2305	4.17702	49.1557	-3.55435	1.18344e-13	1.08271e-10	462	--	--	--	--	--	--	--	--	--	--	--	--	--	--	--	--	--	--	PF09117	MiAMP1	GO:0045926//GO:0006952	negative regulation of growth//defense response	--	--	--	--	--	--
Cluster-3890.16447	0.122854	6.96525	-5.73803	1.6451e-13	1.44718e-10	519	--	--	--	--	--	--	--	--	--	--	--	--	--	--	--	--	--	--	PF09117	MiAMP1	GO:0006952//GO:0045926	defense response//negative regulation of growth	--	--	--	--	--	--
Cluster-3890.3208	55.8984	5.00232	3.48009	1.98791e-13	1.68398e-10	1107	1573258682	RZC63912.1	327	9.7e-28	hypothetical protein C5167_025653 [Papaver somniferum]	--	--	--	--	--	--	--	--	--	Q9LM15	258	3.7e-21	Ethylene-responsive transcription factor RAP2-13 OS=Arabidopsis thaliana OX=3702 GN=RAP2-13 PE=1 SV=1	PF09618//PF00847//PF03179	CRISPR-associated protein (Cas_Csy4)//AP2 domain//Vacuolar (H+)-ATPase G subunit	GO:1902600//GO:0006810//GO:0006355//GO:0043571	proton transmembrane transport//transport//regulation of transcription, DNA-templated//maintenance of CRISPR repeat elements	GO:0004519//GO:0042626//GO:0003700	endonuclease activity//ATPase-coupled transmembrane transporter activity//DNA-binding transcription factor activity	GO:0005667//GO:0016471	transcription regulator complex//vacuolar proton-transporting V-type ATPase complex	--	--
Cluster-3890.12534	91.8945	8.86487	3.37266	3.02479e-13	2.42492e-10	619	324331728	ADY38659.1	273	9.9e-22	putative mannose-binding lectin [Wolffia arrhiza]	--	--	--	--	--	--	--	--	--	P30617	196	3.2e-14	Mannose-specific lectin OS=Galanthus nivalis OX=4670 PE=1 SV=1	--	--	--	--	--	--	--	--	--	--
Cluster-3890.7149	61.7954	596.732	-3.27135	3.07462e-13	2.42492e-10	1150	374433996	AEZ52390.1	628	1.3e-62	pathogenesis-related protein 1 [Wolffia australiana]	CP019099.1	CP019099	157	8.50196e-75	Spirodela polyrhiza strain 9509 chromosome 7 sequence	K13449	PR1	pathogenesis-related protein 1	http://www.genome.jp/dbget-bin/www_bget?ko:K13449	P11670	455	5.5e-44	Basic form of pathogenesis-related protein 1 OS=Nicotiana tabacum OX=4097 PE=3 SV=1	--	--	--	--	--	--	--	--	--	--
Cluster-3890.15122	8.16977	0.253282	4.96912	3.26929e-13	2.49251e-10	1172	720070622	XP_010277803.1	1213	1.9e-130	PREDICTED: endoglucanase 12-like [Nelumbo nucifera]	--	--	--	--	--	--	--	--	--	Q7XUK4	1059	5.1e-114	Endoglucanase 12 OS=Oryza sativa subsp. japonica OX=39947 GN=GLU3 PE=2 SV=2	PF00759	Glycosyl hydrolase family 9	GO:0005975	carbohydrate metabolic process	GO:0004553	hydrolase activity, hydrolyzing O-glycosyl compounds	--	--	--	--
Cluster-3890.7754	110.077	1034.15	-3.23177	5.07751e-13	3.74622e-10	649	--	--	--	--	--	--	--	--	--	--	--	--	--	--	--	--	--	--	PF09117	MiAMP1	GO:0006952//GO:0045926	defense response//negative regulation of growth	--	--	--	--	--	--
Cluster-3890.14399	12.5925	0.759846	4.03688	1.06912e-12	7.64155e-10	1982	357141041	XP_003572056.1	142	4.9e-06	pEARLI1-like lipid transfer protein 3 [Brachypodium distachyon]	--	--	--	--	--	--	--	--	--	--	--	--	--	--	--	--	--	--	--	--	--	--	--
Cluster-3890.5762	18.6738	170.598	-3.19098	1.73702e-12	1.20391e-09	1780	1137186254	OMO61024.1	576	2.1e-56	Plant peroxidase [Corchorus olitorius]	AC123575.10	AC123575	37	6.77628e-08	Medicago truncatula clone mth1-31p6, complete sequence	--	--	--	--	A7NY33	523	1.1e-51	Peroxidase 4 OS=Vitis vinifera OX=29760 GN=GSVIVT00023967001 PE=1 SV=1	PF00141	Peroxidase	GO:0055114//GO:0006979//GO:0006804	oxidation-reduction process//response to oxidative stress//obsolete peroxidase reaction	GO:0020037//GO:0004601	heme binding//peroxidase activity	--	--	--	--
Cluster-3890.1959	12.7768	0.823166	3.94348	1.93652e-12	1.30271e-09	537	--	--	--	--	--	--	--	--	--	--	--	--	--	--	--	--	--	--	--	--	--	--	--	--	--	--	--	--
Cluster-3890.10852	6.14268	0.189961	4.9589	9.57923e-12	6.086e-09	684	1220030990	XP_021806815.1	180	6.6e-11	14 kDa proline-rich protein DC2.15-like [Prunus avium]	--	--	--	--	--	--	--	--	--	Q9SU34	145	2.9e-08	pEARLI1-like lipid transfer protein 2 OS=Arabidopsis thaliana OX=3702 GN=At4g12490 PE=2 SV=1	--	--	--	--	--	--	--	--	--	--
Cluster-3890.752	10.6268	91.4981	-3.10509	9.45607e-12	6.086e-09	2257	672188593	XP_008813620.1	589	8.2e-58	cytochrome P450 71A1-like [Phoenix dactylifera]	--	--	--	--	--	--	--	--	--	Q9LIP3	528	3.7e-52	Cytochrome P450 71B37 OS=Arabidopsis thaliana OX=3702 GN=CYP71B37 PE=3 SV=2	PF00067//PF15761//PF02043	Cytochrome P450//Immortalisation up-regulated protein//Bacteriochlorophyll C binding protein	GO:0055114//GO:0015979	oxidation-reduction process//photosynthesis	GO:0020037//GO:0005506//GO:0016705	heme binding//iron ion binding//oxidoreductase activity, acting on paired donors, with incorporation or reduction of molecular oxygen	GO:0005634	nucleus	--	--
Cluster-3890.15121	4.1156	0	9.04708	9.95922e-12	6.15641e-09	832	1557859366	RWR83932.1	818	8.5e-85	endoglucanase 12-like protein [Cinnamomum micranthum f. kanehirae]	CP019093.1	CP019093	172	2.78971e-83	Spirodela polyrhiza strain 9509 chromosome 1 sequence	--	--	--	--	Q7XUK4	769	1.5e-80	Endoglucanase 12 OS=Oryza sativa subsp. japonica OX=39947 GN=GLU3 PE=2 SV=2	PF00759	Glycosyl hydrolase family 9	GO:0005975	carbohydrate metabolic process	GO:0004553	hydrolase activity, hydrolyzing O-glycosyl compounds	--	--	--	--
Cluster-3890.9004	55.0999	6.20541	3.14884	1.33726e-11	8.04888e-09	1659	743769405	XP_010914990.1	704	2.8e-71	gibberellin 3-beta-dioxygenase 1-like [Elaeis guineensis]	XM_009398371.2	XM_009398371	66	4.77298e-24	PREDICTED: Musa acuminata subsp. malaccensis gibberellin 3-beta-dioxygenase 1-like (LOC103981624), mRNA	K04124	E1.14.11.15	gibberellin 3-beta-dioxygenase	http://www.genome.jp/dbget-bin/www_bget?ko:K04124	O24648	596	3.6e-60	Gibberellin 3-beta-dioxygenase 1 OS=Pisum sativum OX=3888 GN=LE PE=1 SV=1	PF03171	2OG-Fe(II) oxygenase superfamily	GO:0055114	oxidation-reduction process	GO:0016491	oxidoreductase activity	--	--	--	--
Cluster-3890.700	0.491415	8.80155	-4.14132	1.57641e-11	9.24507e-09	1851	1216951662	XP_021672128.1	2024	2.7e-224	4-coumarate--CoA ligase 2-like [Hevea brasiliensis]	XM_010036646.2	XM_010036646	123	1.09942e-55	PREDICTED: Eucalyptus grandis 4-coumarate--CoA ligase 2 (LOC104424278), mRNA	K01904	4CL	4-coumarate--CoA ligase	http://www.genome.jp/dbget-bin/www_bget?ko:K01904	P31687	1891	2.7e-210	4-coumarate--CoA ligase 2 OS=Glycine max OX=3847 PE=2 SV=2	PF00501	AMP-binding enzyme	--	--	GO:0003824	catalytic activity	--	--	--	--
Cluster-3890.5510	16.4624	1.45637	3.49171	1.67811e-11	9.59544e-09	1463	1130837092	GAV81122.1	1098	5.1e-117	Asparaginase_2 domain-containing protein [Cephalotus follicularis]	XM_028224363.1	XM_028224363	174	3.8597e-84	PREDICTED: Camellia sinensis probable isoaspartyl peptidase/L-asparaginase 2 (LOC114281779), mRNA	K13051	iaaA, ASRGL1	beta-aspartyl-peptidase (threonine type)	http://www.genome.jp/dbget-bin/www_bget?ko:K13051	Q8GXG1	993	2.9e-106	Probable isoaspartyl peptidase/L-asparaginase 2 OS=Arabidopsis thaliana OX=3702 GN=At3g16150 PE=2 SV=2	PF01112	Asparaginase	--	--	GO:0016787	hydrolase activity	--	--	KOG1592	Asparaginase
Cluster-3890.16256	8.23119	68.6394	-3.05866	2.61714e-11	1.45998e-08	1341	1334287400	PNT02599.1	1248	1.9e-134	hypothetical protein POPTR_014G022900 [Populus trichocarpa]	CP019102.1	CP019102	102	3.73599e-44	Spirodela polyrhiza strain 9509 chromosome 10 sequence	K13051	iaaA, ASRGL1	beta-aspartyl-peptidase (threonine type)	http://www.genome.jp/dbget-bin/www_bget?ko:K13051	Q8GXG1	1205	6.9e-131	Probable isoaspartyl peptidase/L-asparaginase 2 OS=Arabidopsis thaliana OX=3702 GN=At3g16150 PE=2 SV=2	PF01112	Asparaginase	--	--	GO:0016787	hydrolase activity	--	--	KOG1592	Asparaginase
Cluster-3890.12219	55.9162	431.972	-2.94942	2.95175e-11	1.57005e-08	2513	1394869361	PWZ13957.1	1081	8.2e-115	Glucan endo-1,3-beta-glucosidase 13 [Zea mays]	--	--	--	--	--	--	--	--	--	Q9FJU9	807	1.8e-84	Glucan endo-1,3-beta-glucosidase 13 OS=Arabidopsis thaliana OX=3702 GN=At5g56590 PE=2 SV=1	PF00332	Glycosyl hydrolases family 17	GO:0005975	carbohydrate metabolic process	GO:0004553	hydrolase activity, hydrolyzing O-glycosyl compounds	--	--	--	--
Cluster-3890.6773	34.2762	3.79923	3.1708	2.91676e-11	1.57005e-08	638	339716060	AEJ88277.1	190	4.3e-12	putative 14 kDa proline-rich protein DC2.15 precursor [Wolffia australiana]	--	--	--	--	--	--	--	--	--	Q39176	166	9.9e-11	Lipid transfer protein EARLI 1 OS=Arabidopsis thaliana OX=3702 GN=EARLI1 PE=1 SV=1	--	--	--	--	--	--	--	--	--	--
Cluster-3890.3456	5.71269	0.189961	4.85434	3.36017e-11	1.74668e-08	630	339716060	AEJ88277.1	167	2e-09	putative 14 kDa proline-rich protein DC2.15 precursor [Wolffia australiana]	--	--	--	--	--	--	--	--	--	Q39176	132	8.6e-07	Lipid transfer protein EARLI 1 OS=Arabidopsis thaliana OX=3702 GN=EARLI1 PE=1 SV=1	--	--	--	--	--	--	--	--	--	--
Cluster-3890.15852	1.5971	16.4633	-3.35939	8.49648e-11	4.31848e-08	518	--	--	--	--	--	--	--	--	--	--	--	--	--	--	--	--	--	--	--	--	--	--	--	--	--	--	--	--
Cluster-3890.5326	4.72987	39.1403	-3.04669	8.92623e-11	4.43827e-08	957	1279117783	XP_022883262.1	925	3.8e-97	peroxidase 5-like [Olea europaea var. sylvestris]	XM_003568943.4	XM_003568943	48	2.75362e-14	PREDICTED: Brachypodium distachyon peroxidase 5 (LOC100843052), mRNA	K00430	E1.11.1.7	peroxidase	http://www.genome.jp/dbget-bin/www_bget?ko:K00430	A7QEU4	722	5e-75	Peroxidase 5 OS=Vitis vinifera OX=29760 GN=GSVIVT00037159001 PE=1 SV=2	PF00141	Peroxidase	GO:0055114//GO:0006979//GO:0006804	oxidation-reduction process//response to oxidative stress//obsolete peroxidase reaction	GO:0020037//GO:0004601	heme binding//peroxidase activity	--	--	--	--
Cluster-3890.6688	183.899	25.0458	2.87589	1.08083e-10	5.25974e-08	967	695006290	XP_009389630.1	765	1.4e-78	PREDICTED: alpha carbonic anhydrase 1, chloroplastic isoform X1 [Musa acuminata subsp. malaccensis]	--	--	--	--	--	K01674	cah	carbonic anhydrase	http://www.genome.jp/dbget-bin/www_bget?ko:K01674	O04846	571	1.6e-57	Alpha carbonic anhydrase 1, chloroplastic OS=Arabidopsis thaliana OX=3702 GN=ACA1 PE=1 SV=2	--	--	--	--	--	--	--	--	KOG0382	Carbonic anhydrase
Cluster-3890.126	0.307134	6.39537	-4.34569	1.18423e-10	5.64286e-08	1608	649947784	AIC73642.1	1678	3.1e-184	flavonoid 3'-hydroxylase [Anthurium andraeanum]	--	--	--	--	--	K05280	E1.14.13.21	flavonoid 3'-monooxygenase	http://www.genome.jp/dbget-bin/www_bget?ko:K05280	A0A4D6Q415	1541	9.1e-170	Flavonoid 3'-monooxygenase CYP75B137 OS=Crocosmia x crocosmiiflora OX=1053288 GN=CYP75B137 PE=1 SV=1	PF00067	Cytochrome P450	GO:0055114	oxidation-reduction process	GO:0016705//GO:0020037//GO:0005506	oxidoreductase activity, acting on paired donors, with incorporation or reduction of molecular oxygen//heme binding//iron ion binding	--	--	--	--
Cluster-3890.10728	128.266	17.6632	2.85977	1.59388e-10	7.43985e-08	689	1315718083	PKU81688.1	321	3e-27	hypothetical protein MA16_Dca020324 [Dendrobium catenatum]	--	--	--	--	--	--	--	--	--	--	--	--	--	--	--	--	--	--	--	--	--	--	--
Cluster-3890.12404	37.1632	4.68572	2.98544	1.85426e-10	8.48214e-08	530	--	--	--	--	--	--	--	--	--	--	--	--	--	--	--	--	--	--	PF09117	MiAMP1	GO:0045926//GO:0006952	negative regulation of growth//defense response	--	--	--	--	--	--
Cluster-3890.1398	0.552841	8.0417	-3.84376	2.13603e-10	9.57947e-08	498	--	--	--	--	--	--	--	--	--	--	--	--	--	--	--	--	--	--	--	--	--	--	--	--	--	--	--	--
Cluster-3890.16066	3.31705	27.2924	-3.03755	2.3411e-10	1.02972e-07	2617	1091751953	XP_018685591.1	1957	2.2e-216	PREDICTED: ent-copalyl diphosphate synthase 1, chloroplastic-like [Musa acuminata subsp. malaccensis]	--	--	--	--	--	K04120	E5.5.1.13	ent-copalyl diphosphate synthase	http://www.genome.jp/dbget-bin/www_bget?ko:K04120	A0A0M4M0T9	1807	2.1e-200	(-)-kolavenyl diphosphate synthase TPS28, chloroplastic OS=Tripterygium wilfordii OX=458696 GN=TPS28 PE=1 SV=1	PF01397//PF00432//PF03936	Terpene synthase, N-terminal domain//Prenyltransferase and squalene oxidase repeat//Terpene synthase family, metal binding domain	--	--	GO:0000287//GO:0010333//GO:0003824//GO:0016829	magnesium ion binding//terpene synthase activity//catalytic activity//lyase activity	--	--	--	--
Cluster-3890.16627	2.94849	24.3151	-3.04046	3.03323e-10	1.30898e-07	408	587866050	EXB55550.1	229	8.3e-17	Glu S.griseus protease inhibitor [Morus notabilis]	--	--	--	--	--	--	--	--	--	P24076	206	1.5e-15	Glu S.griseus protease inhibitor OS=Momordica charantia OX=3673 PE=1 SV=1	PF00280	Potato inhibitor I family	GO:0009611	response to wounding	GO:0004867	serine-type endopeptidase inhibitor activity	--	--	--	--
Cluster-3890.2418	5.40556	41.133	-2.92597	3.27732e-10	1.38813e-07	438	--	--	--	--	--	--	--	--	--	--	--	--	--	--	--	--	--	--	PF09117	MiAMP1	GO:0045926//GO:0006952	negative regulation of growth//defense response	--	--	--	--	--	--
Cluster-3890.11928	35.8733	4.74904	2.91515	4.45751e-10	1.85368e-07	1530	--	--	--	--	--	--	--	--	--	--	--	--	--	--	--	--	--	--	PF01983	Guanylyl transferase CofC like	GO:0009108	obsolete coenzyme biosynthetic process	GO:0043814	phospholactate guanylyltransferase activity	--	--	--	--
Cluster-3890.6041	216.151	32.0661	2.75262	4.73272e-10	1.93298e-07	1959	901796479	KMZ59177.1	251	1.1e-18	hypothetical protein ZOSMA_6G01080 [Zostera marina]	--	--	--	--	--	--	--	--	--	--	--	--	--	--	--	--	--	--	--	--	--	--	--
Cluster-3890.9976	3.62418	27.9876	-2.94636	5.7254e-10	2.29739e-07	721	1557875297	RWR95822.1	163	6.5e-09	pectinesterase [Cinnamomum micranthum f. kanehirae]	--	--	--	--	--	K01051	E3.1.1.11	pectinesterase	http://www.genome.jp/dbget-bin/www_bget?ko:K01051	O04886	151	6.1e-09	Pectinesterase 1 OS=Citrus sinensis OX=2711 GN=PECS-1.1 PE=2 SV=1	--	--	--	--	--	--	--	--	--	--
Cluster-3890.7894	1251.2	194.531	2.6852	8.02455e-10	3.16444e-07	1162	672171245	XP_008805688.1	146	9.9e-07	uncharacterized protein LOC103718577 [Phoenix dactylifera]	--	--	--	--	--	--	--	--	--	--	--	--	--	--	--	--	--	--	--	--	--	--	--
Cluster-3890.5779	44.3502	6.33205	2.80667	1.11862e-09	4.33646e-07	419	695049015	XP_009412430.1	292	4.2e-24	PREDICTED: uncharacterized protein LOC103993915 [Musa acuminata subsp. malaccensis]	--	--	--	--	--	--	--	--	--	--	--	--	--	PF09297//PF03243	NADH pyrophosphatase zinc ribbon domain//Alkylmercury lyase	GO:0046413	organomercury catabolic process	GO:0016787//GO:0046872//GO:0018836	hydrolase activity//metal ion binding//alkylmercury lyase activity	--	--	--	--
Cluster-942.0	0	2.97606	-8.58043	1.2482e-09	4.75812e-07	852	--	--	--	--	--	--	--	--	--	--	--	--	--	--	--	--	--	--	--	--	--	--	--	--	--	--	--	--
Cluster-3890.4601	2.08851	16.9066	-3.01233	1.31945e-09	4.94728e-07	1088	460377276	XP_004234419.1	1141	3.9e-122	peroxidase P7-like [Solanum lycopersicum]	CP019093.1	CP019093	210	2.76809e-104	Spirodela polyrhiza strain 9509 chromosome 1 sequence	K00430	E1.11.1.7	peroxidase	http://www.genome.jp/dbget-bin/www_bget?ko:K00430	Q9FLC0	945	7.9e-101	Peroxidase 52 OS=Arabidopsis thaliana OX=3702 GN=PER52 PE=2 SV=1	PF00141	Peroxidase	GO:0006979//GO:0055114//GO:0006804	response to oxidative stress//oxidation-reduction process//obsolete peroxidase reaction	GO:0020037//GO:0004601	heme binding//peroxidase activity	--	--	--	--
Cluster-3890.15874	16.3395	105.935	-2.69616	1.41993e-09	5.23815e-07	662	--	--	--	--	--	--	--	--	--	--	--	--	--	--	--	--	--	--	PF09117	MiAMP1	GO:0045926//GO:0006952	negative regulation of growth//defense response	--	--	--	--	--	--
Cluster-3890.6120	165.069	1028.13	-2.63882	1.46332e-09	5.31254e-07	1177	1150697219	XP_020259548.1	967	6.3e-102	peroxidase 5-like [Asparagus officinalis]	XM_028229995.1	XM_028229995	39	3.43345e-09	PREDICTED: Camellia sinensis peroxidase 5-like (LOC114286782), mRNA	K00430	E1.11.1.7	peroxidase	http://www.genome.jp/dbget-bin/www_bget?ko:K00430	A7QEU4	934	1.6e-99	Peroxidase 5 OS=Vitis vinifera OX=29760 GN=GSVIVT00037159001 PE=1 SV=2	PF00141	Peroxidase	GO:0006804//GO:0055114//GO:0006979	obsolete peroxidase reaction//oxidation-reduction process//response to oxidative stress	GO:0004601//GO:0020037	peroxidase activity//heme binding	--	--	--	--
Cluster-3890.11492	38.3303	239.225	-2.64156	1.81722e-09	6.49429e-07	497	--	--	--	--	--	--	--	--	--	--	--	--	--	--	--	--	--	--	PF09117	MiAMP1	GO:0045926//GO:0006952	negative regulation of growth//defense response	--	--	--	--	--	--
Cluster-3890.2533	1.90423	15.3869	-3.00926	1.86688e-09	6.56913e-07	769	620989905	AHY23236.1	610	1e-60	flowering locus T [Agapanthus praecox subsp. orientalis]	XM_020233468.1	XM_020233468	65	7.77789e-24	PREDICTED: Ananas comosus protein MOTHER of FT and TFL1 homolog 1-like (LOC109710729), mRNA	--	--	--	--	Q9XFK7	583	5.3e-59	Protein MOTHER of FT and TFL1 OS=Arabidopsis thaliana OX=3702 GN=MFT PE=1 SV=1	--	--	--	--	--	--	--	--	KOG3346	Phosphatidylethanolamine binding protein
Cluster-3890.10443	24.1407	3.29266	2.8712	2.09921e-09	7.27473e-07	932	695072500	XP_009383374.1	166	3.8e-09	PREDICTED: sigma factor binding protein 2, chloroplastic-like [Musa acuminata subsp. malaccensis]	--	--	--	--	--	--	--	--	--	--	--	--	--	--	--	--	--	--	--	--	--	--	--
Cluster-3890.10322	82.3445	12.9617	2.66669	2.50252e-09	8.54294e-07	540	1175884444	XP_020595895.1	406	3.3e-37	uncharacterized protein LOC110035905 [Phalaenopsis equestris]	--	--	--	--	--	--	--	--	--	--	--	--	--	--	--	--	--	--	--	--	--	--	--
Cluster-3890.2521	10.934	69.5259	-2.66787	2.74863e-09	9.2451e-07	893	1527547369	XP_027123634.1	520	3.3e-50	high-affinity nitrate transporter 3.1-like [Coffea arabica]	--	--	--	--	--	--	--	--	--	Q6ZI50	396	3e-37	High-affinity nitrate transporter-activating protein 2.1 OS=Oryza sativa subsp. japonica OX=39947 GN=NAR2.1 PE=1 SV=1	PF16974	High-affinity nitrate transporter accessory	GO:0010167//GO:0015706	response to nitrate//nitrate transport	--	--	--	--	--	--
Cluster-23.0	0	2.7861	-8.48553	3.08575e-09	1.02286e-06	645	1559666136	RWW88213.1	591	1.4e-58	hypothetical protein BHE74_00002908 [Ensete ventricosum]	--	--	--	--	--	K13449	PR1	pathogenesis-related protein 1	http://www.genome.jp/dbget-bin/www_bget?ko:K13449	P08299	520	9e-52	Pathogenesis-related protein 1A OS=Nicotiana tabacum OX=4097 PE=1 SV=1	--	--	--	--	--	--	--	--	--	--
Cluster-3890.4563	66.0953	393.855	-2.5749	3.55008e-09	1.15996e-06	1674	1293578152	PKA50216.1	1015	2.4e-107	Cytochrome P450 89A2 [Apostasia shenzhenica]	CP019102.1	CP019102	85	1.3205e-34	Spirodela polyrhiza strain 9509 chromosome 10 sequence	--	--	--	--	Q42602	813	2.5e-85	Cytochrome P450 89A2 OS=Arabidopsis thaliana OX=3702 GN=CYP89A2 PE=2 SV=2	PF05887//PF00067//PF12326//PF01080	Procyclic acidic repetitive protein (PARP)//Cytochrome P450//N-glycosylation protein//Presenilin	GO:0016485//GO:0034599//GO:0055114	protein processing//cellular response to oxidative stress//oxidation-reduction process	GO:0016705//GO:0004190//GO:0020037//GO:0005506	oxidoreductase activity, acting on paired donors, with incorporation or reduction of molecular oxygen//aspartic-type endopeptidase activity//heme binding//iron ion binding	GO:0016021//GO:0016020//GO:0005789	integral component of membrane//membrane//endoplasmic reticulum membrane	--	--
Cluster-3890.17455	0.0614268	3.29266	-5.5753	4.10498e-09	1.30402e-06	1237	695059699	XP_009418217.1	1482	1.3e-161	PREDICTED: alpha-dioxygenase 1-like [Musa acuminata subsp. malaccensis]	XM_028265593.1	XM_028265593	143	5.55456e-67	PREDICTED: Camellia sinensis alpha-dioxygenase 1-like (LOC114318657), mRNA	K10529	DOX1	alpha-dioxygenase	http://www.genome.jp/dbget-bin/www_bget?ko:K10529	Q9SGH6	1284	4.4e-140	Alpha-dioxygenase 1 OS=Arabidopsis thaliana OX=3702 GN=DOX1 PE=1 SV=1	--	--	--	--	--	--	--	--	--	--
Cluster-3890.8337	6.14268	39.8286	-2.69532	4.07692e-09	1.30402e-06	315	--	--	--	--	--	--	--	--	--	--	--	--	--	--	--	--	--	--	--	--	--	--	--	--	--	--	--	--
Cluster-3890.14464	6.57267	42.0448	-2.67593	4.67069e-09	1.4634e-06	717	1276256060	PIN13822.1	526	5.3e-51	hypothetical protein CDL12_13550 [Handroanthus impetiginosus]	--	--	--	--	--	--	--	--	--	Q94AL8	454	4.5e-44	Cold-regulated 413 inner membrane protein 1, chloroplastic OS=Arabidopsis thaliana OX=3702 GN=COR413IM1 PE=1 SV=1	PF05562	Cold acclimation protein WCOR413	--	--	--	--	GO:0016021	integral component of membrane	--	--
Cluster-4239.0	3.25562	0.0633205	5.52008	5.3911e-09	1.66629e-06	864	--	--	--	--	--	--	--	--	--	--	--	--	--	--	--	--	--	--	--	--	--	--	--	--	--	--	--	--
Cluster-3890.15978	19.8409	117.903	-2.57058	5.96543e-09	1.80078e-06	676	301071042	ADK55603.1	281	1.3e-22	mannose-binding lectin [Wolffia arrhiza]	--	--	--	--	--	--	--	--	--	P30617	238	4.7e-19	Mannose-specific lectin OS=Galanthus nivalis OX=4670 PE=1 SV=1	--	--	--	--	--	--	--	--	--	--
Cluster-3890.8406	15.041	90.2317	-2.58411	5.9837e-09	1.80078e-06	770	1179549543	XP_020695578.1	224	5.9e-16	major pollen allergen Bet v 1-M/N [Dendrobium catenatum]	CP019099.1	CP019099	71	3.59807e-27	Spirodela polyrhiza strain 9509 chromosome 7 sequence	--	--	--	--	P15494	156	1.7e-09	Major pollen allergen Bet v 1-A OS=Betula pendula OX=3505 GN=BETVIA PE=1 SV=2	PF00407	Pathogenesis-related protein Bet v 1 family	GO:0006952	defense response	--	--	--	--	--	--
Cluster-3890.7550	1277.25	222.508	2.52107	6.35703e-09	1.88829e-06	513	--	--	--	--	--	--	--	--	--	--	--	--	--	--	--	--	--	--	--	--	--	--	--	--	--	--	--	--
Cluster-3890.6192	93.2459	15.6769	2.57181	6.69589e-09	1.93859e-06	1630	1052192940	XP_017700701.1	1572	6.2e-172	probable glucan 1,3-beta-glucosidase A isoform X1 [Phoenix dactylifera]	XM_021429171.1	XM_021429171	53	7.90004e-17	PREDICTED: Herrania umbratica probable glucan 1,3-beta-glucosidase A (LOC110417011), mRNA	--	--	--	--	Q0CR35	376	1.1e-34	Probable glucan 1,3-beta-glucosidase A OS=Aspergillus terreus (strain NIH 2624 / FGSC A1156) OX=341663 GN=exgA PE=3 SV=1	PF00150//PF06268	Cellulase (glycosyl hydrolase family 5)//Fascin domain	GO:0005975	carbohydrate metabolic process	GO:0004553//GO:0051015//GO:0030674	hydrolase activity, hydrolyzing O-glycosyl compounds//actin filament binding//protein-macromolecule adaptor activity	--	--	--	--
Cluster-3890.6407	5.28332	34.0727	-2.6873	6.66058e-09	1.93859e-06	747	1536884	CAA56115.1	351	1.1e-30	trypsin/chymotrypsin inhibitor [Alocasia macrorrhizos]	--	--	--	--	--	--	--	--	--	P35812	326	3.2e-29	Trypsin/chymotrypsin inhibitor OS=Alocasia macrorrhizos OX=4456 PE=1 SV=1	PF00197	Trypsin and protease inhibitor	--	--	GO:0004866	endopeptidase inhibitor activity	--	--	--	--
Cluster-3890.11469	72.4683	413.994	-2.51406	7.49779e-09	2.14362e-06	1380	731321374	XP_010671317.1	404	1.4e-36	PREDICTED: peroxidase 5-like [Beta vulgaris subsp. vulgaris]	XM_025936771.1	XM_025936771	45	1.86763e-12	PREDICTED: Panicum hallii peroxidase 64 (LOC112873729), mRNA	K00430	E1.11.1.7	peroxidase	http://www.genome.jp/dbget-bin/www_bget?ko:K00430	A7QEU4	359	9e-33	Peroxidase 5 OS=Vitis vinifera OX=29760 GN=GSVIVT00037159001 PE=1 SV=2	PF00141	Peroxidase	GO:0055114//GO:0006979//GO:0006804	oxidation-reduction process//response to oxidative stress//obsolete peroxidase reaction	GO:0020037//GO:0004601	heme binding//peroxidase activity	--	--	--	--
Cluster-3890.2750	7.24837	0.696525	3.3649	7.77979e-09	2.19678e-06	1566	1278998248	XP_022859341.1	193	4.7e-12	senescence-induced receptor-like serine/threonine-protein kinase isoform X1 [Olea europaea var. sylvestris]	--	--	--	--	--	--	--	--	--	C0LGR6	154	6e-09	Probable LRR receptor-like serine/threonine-protein kinase At4g29180 OS=Arabidopsis thaliana OX=3702 GN=At4g29180 PE=1 SV=2	--	--	--	--	--	--	--	--	--	--
Cluster-3890.5549	14.4961	84.5696	-2.54383	9.91078e-09	2.76438e-06	722	880797012	AKQ09030.1	533	8.2e-52	chitinase [Triticum aestivum]	XM_006655233.2	XM_006655233	101	7.07805e-44	PREDICTED: Oryza brachyantha chitinase 2-like (LOC102708623), partial mRNA	K20547	CHIB	basic endochitinase B	http://www.genome.jp/dbget-bin/www_bget?ko:K20547	P24091	520	1e-51	Endochitinase B OS=Nicotiana tabacum OX=4097 GN=CHN50 PE=1 SV=1	PF00182	Chitinase class I	GO:0006032//GO:0016998	chitin catabolic process//cell wall macromolecule catabolic process	GO:0004568	chitinase activity	--	--	--	--
Cluster-3890.14182	6.44982	39.0687	-2.59723	1.25383e-08	3.37384e-06	1947	672160052	XP_008799796.1	428	3.3e-39	LOW QUALITY PROTEIN: zinc transporter 5-like [Phoenix dactylifera]	--	--	--	--	--	K14709	SLC39A1_2_3, ZIP1_2_3	solute carrier family 39 (zinc transporter), member 1/2/3	http://www.genome.jp/dbget-bin/www_bget?ko:K14709	Q6L8G0	399	2.9e-37	Zinc transporter 5 OS=Oryza sativa subsp. japonica OX=39947 GN=ZIP5 PE=2 SV=1	PF02535	ZIP Zinc transporter	GO:0055085//GO:0030001	transmembrane transport//metal ion transport	GO:0046873	metal ion transmembrane transporter activity	GO:0016020	membrane	--	--
Cluster-3890.3113	33.2933	187.554	-2.49372	1.22655e-08	3.37384e-06	1327	672176394	XP_008808270.1	570	7.7e-56	peroxidase 5-like [Phoenix dactylifera]	--	--	--	--	--	K00430	E1.11.1.7	peroxidase	http://www.genome.jp/dbget-bin/www_bget?ko:K00430	A7QEU4	533	5.7e-53	Peroxidase 5 OS=Vitis vinifera OX=29760 GN=GSVIVT00037159001 PE=1 SV=2	PF00141	Peroxidase	GO:0006804//GO:0006979//GO:0055114	obsolete peroxidase reaction//response to oxidative stress//oxidation-reduction process	GO:0004601//GO:0020037	peroxidase activity//heme binding	--	--	--	--
Cluster-3890.4363	17.2609	2.4695	2.80133	1.24417e-08	3.37384e-06	1757	1216998309	XP_021638428.1	1605	9.9e-176	cytochrome P450 78A9-like [Hevea brasiliensis]	--	--	--	--	--	--	--	--	--	Q9SLP1	1489	1.1e-163	Cytochrome P450 78A9 OS=Arabidopsis thaliana OX=3702 GN=CYP78A9 PE=1 SV=1	PF00067	Cytochrome P450	GO:0055114	oxidation-reduction process	GO:0020037//GO:0005506//GO:0016705	heme binding//iron ion binding//oxidoreductase activity, acting on paired donors, with incorporation or reduction of molecular oxygen	--	--	--	--
Cluster-2613.0	0.245707	4.30579	-4.08882	1.50299e-08	3.97187e-06	1670	--	--	--	--	--	--	--	--	--	--	--	--	--	--	--	--	--	--	PF15957	Commissureless	GO:0007411	axon guidance	--	--	--	--	--	--
Cluster-3890.14225	9.76686	1.19486	3.02283	1.51081e-08	3.97187e-06	825	743851048	XP_010940038.1	428	1.4e-39	transcription factor bHLH162 [Elaeis guineensis]	--	--	--	--	--	--	--	--	--	F4JIJ7	194	7.3e-14	Transcription factor bHLH162 OS=Arabidopsis thaliana OX=3702 GN=BHLH162 PE=1 SV=1	PF00010	Helix-loop-helix DNA-binding domain	--	--	GO:0046983	protein dimerization activity	--	--	--	--
Cluster-3890.7908	1788.5	327.937	2.44724	1.55746e-08	4.04799e-06	574	1216234779	XP_021622246.1	158	2e-08	14 kDa proline-rich protein DC2.15-like [Manihot esculenta]	--	--	--	--	--	--	--	--	--	--	--	--	--	--	--	--	--	--	--	--	--	--	--
Cluster-3890.16816	0.798549	7.59846	-3.23772	1.68729e-08	4.33616e-06	809	5360178	AAD42895.1	435	2.1e-40	Cen-like protein FDR2 [Oryza sativa Indica Group]	--	--	--	--	--	--	--	--	--	Q9XH42	401	7.1e-38	CEN-like protein 4 OS=Nicotiana tabacum OX=4097 GN=CET4 PE=2 SV=1	--	--	--	--	--	--	--	--	KOG3346	Phosphatidylethanolamine binding protein
Cluster-2245.0	0.675695	6.83861	-3.32435	1.81173e-08	4.6042e-06	521	--	--	--	--	--	--	--	--	--	--	--	--	--	--	--	--	--	--	--	--	--	--	--	--	--	--	--	--
Cluster-3890.3149	3.80846	0.189961	4.27036	2.12049e-08	5.27172e-06	1228	743772921	XP_010916782.1	809	1.4e-83	MLO-like protein 2 [Elaeis guineensis]	--	--	--	--	--	K08472	MLO	mlo protein	http://www.genome.jp/dbget-bin/www_bget?ko:K08472	O80961	659	1.3e-67	MLO-like protein 12 OS=Arabidopsis thaliana OX=3702 GN=MLO12 PE=2 SV=2	PF03094	Mlo family	GO:0006952	defense response	--	--	GO:0016021	integral component of membrane	--	--
Cluster-3890.7052	19.7794	3.03938	2.69902	2.11954e-08	5.27172e-06	865	1389637530	XP_015874448.2	758	8e-78	kiwellin-like [Ziziphus jujuba]	CP019100.1	CP019100	161	3.78444e-77	Spirodela polyrhiza strain 9509 chromosome 8 sequence	--	--	--	--	P84527	733	2.4e-76	Kiwellin OS=Actinidia deliciosa OX=3627 PE=1 SV=2	--	--	--	--	--	--	--	--	--	--
Cluster-3890.5018	26.7207	4.36911	2.61039	2.21096e-08	5.43753e-06	2795	1570363093	XP_027929476.1	687	4.4e-69	putative leucine-rich repeat receptor-like protein kinase At2g19210 isoform X1 [Vigna unguiculata]	--	--	--	--	--	--	--	--	--	Q9C8I6	491	9e-48	LRR receptor-like serine/threonine-protein kinase IOS1 OS=Arabidopsis thaliana OX=3702 GN=IOS1 PE=1 SV=1	PF09618	CRISPR-associated protein (Cas_Csy4)	GO:0043571	maintenance of CRISPR repeat elements	GO:0004519	endonuclease activity	--	--	--	--
Cluster-3890.6914	809.421	152.476	2.40825	2.57652e-08	6.26916e-06	1142	98975371	ABF59738.1	516	1.2e-49	CBF-like transcription factor [Trachycarpus fortunei]	XM_028266254.1	XM_028266254	68	2.51898e-25	PREDICTED: Camellia sinensis dehydration-responsive element-binding protein 1A-like (LOC114319247), mRNA	--	--	--	--	A2XWL6	439	3.9e-42	Dehydration-responsive element-binding protein 1E OS=Oryza sativa subsp. indica OX=39946 GN=DREB1E PE=3 SV=1	PF00847	AP2 domain	GO:0006355	regulation of transcription, DNA-templated	GO:0003700	DNA-binding transcription factor activity	GO:0005667	transcription regulator complex	--	--
Cluster-3890.12938	60.2597	320.26	-2.40983	2.74592e-08	6.61102e-06	2896	695010363	XP_009391853.1	924	1.5e-96	PREDICTED: subtilisin-like protease SBT3.5 [Musa acuminata subsp. malaccensis]	KT458802.1	KT458802	65	3.02345e-23	Euphorbia esula voucher Steele_1335 ATPase subunit 8 gene, complete cds; mitochondrial	--	--	--	--	Q9ZSB0	743	5.6e-77	Subtilisin-like protease SBT3.9 OS=Arabidopsis thaliana OX=3702 GN=SBT3.9 PE=3 SV=1	PF00082//PF09285	Subtilase family//Elongation factor P, C-terminal	GO:0043043//GO:0006508	peptide biosynthetic process//proteolysis	GO:0004252	serine-type endopeptidase activity	GO:0005737	cytoplasm	--	--
Cluster-3890.947	3.86989	23.6819	-2.61099	2.89034e-08	6.88624e-06	1681	743779498	XP_010920219.1	1008	1.6e-106	geraniol 8-hydroxylase [Elaeis guineensis]	--	--	--	--	--	--	--	--	--	Q8VWZ7	987	1.7e-105	Geraniol 8-hydroxylase OS=Catharanthus roseus OX=4058 GN=CYP76B6 PE=1 SV=1	PF00067	Cytochrome P450	GO:0055114	oxidation-reduction process	GO:0020037//GO:0005506//GO:0016705	heme binding//iron ion binding//oxidoreductase activity, acting on paired donors, with incorporation or reduction of molecular oxygen	--	--	--	--
Cluster-3890.11755	17.6909	2.72278	2.69637	3.00608e-08	7.01582e-06	953	--	--	--	--	--	--	--	--	--	--	--	--	--	--	--	--	--	--	--	--	--	--	--	--	--	--	--	--
Cluster-3890.16569	2.33422	15.3869	-2.71661	2.97941e-08	7.01582e-06	2303	743779824	XP_010920352.1	1120	2.2e-119	subtilisin-like protease SBT1.2 [Elaeis guineensis]	--	--	--	--	--	--	--	--	--	O65351	794	5.4e-83	Subtilisin-like protease SBT1.7 OS=Arabidopsis thaliana OX=3702 GN=SBT1.7 PE=1 SV=1	PF05656//PF00082	Protein of unknown function (DUF805)//Subtilase family	GO:0006508	proteolysis	GO:0004252	serine-type endopeptidase activity	GO:0016021	integral component of membrane	--	--
Cluster-3890.12993	16.0324	2.40618	2.73221	3.10215e-08	7.1669e-06	2235	1350217366	XP_006449119.2	1196	3.4e-128	uncharacterized protein LOC18052709 [Citrus clementina]	--	--	--	--	--	--	--	--	--	Q8W4G6	1124	2.9e-121	Cysteine-rich receptor-like protein kinase 15 OS=Arabidopsis thaliana OX=3702 GN=CRK15 PE=2 SV=2	PF07714//PF00069	Protein tyrosine and serine/threonine kinase//Protein kinase domain	GO:0006468	protein phosphorylation	GO:0004672//GO:0005524	protein kinase activity//ATP binding	--	--	--	--
Cluster-1749.0	6.20411	0.633205	3.27664	3.44015e-08	7.79041e-06	473	1150682295	XP_020252314.1	358	1.1e-31	glutaredoxin-C1-like [Asparagus officinalis]	--	--	--	--	--	K03676	grxC, GLRX, GLRX2	glutaredoxin 3	http://www.genome.jp/dbget-bin/www_bget?ko:K03676	Q0JG89	322	6e-29	Putative glutaredoxin-C2 OS=Oryza sativa subsp. japonica OX=39947 GN=GRXC2 PE=3 SV=2	PF00462//PF02529	Glutaredoxin//Cytochrome B6-F complex subunit 5	GO:0006118//GO:0045454	obsolete electron transport//cell redox homeostasis	GO:0015035//GO:0009055	protein disulfide oxidoreductase activity//electron transfer activity	GO:0009512	cytochrome b6f complex	--	--
Cluster-2236.0	5.15985	0.443243	3.51819	3.42912e-08	7.79041e-06	1339	1035961407	OAY82169.1	854	9.1e-89	putative LRR receptor-like serine/threonine-protein kinase [Ananas comosus]	XM_028333425.1	XM_028333425	33	8.48456e-06	PREDICTED: Glycine soja leucine-rich repeat receptor-like serine/threonine-protein kinase BAM1 (LOC114375599), mRNA	--	--	--	--	Q9LIG2	805	1.7e-84	Receptor-like protein kinase At3g21340 OS=Arabidopsis thaliana OX=3702 GN=At3g21340 PE=1 SV=1	PF06152//PF07714//PF14991//PF00069//PF04995//PF05832	Phage minor capsid protein 2//Protein tyrosine and serine/threonine kinase//Protein melan-A//Protein kinase domain//Heme exporter protein D (CcmD)//Eukaryotic protein of unknown function (DUF846)	GO:0006468//GO:0017004//GO:0015886	protein phosphorylation//cytochrome complex assembly//heme transport	GO:0004672//GO:0005524//GO:0005198	protein kinase activity//ATP binding//structural molecule activity	GO:0042470//GO:0016021	melanosome//integral component of membrane	--	--
Cluster-3890.5466	98.4058	18.2363	2.43143	3.50912e-08	7.86868e-06	1734	1464276202	AXQ06494.1	1846	1.1e-203	legumain [Vriesea carinata]	NM_119448.4	NM_119448	193	1.2574e-94	Arabidopsis thaliana gamma vacuolar processing enzyme (GAMMA-VPE), mRNA	K01369	LGMN	legumain	http://www.genome.jp/dbget-bin/www_bget?ko:K01369	P49043	1742	4.8e-193	Vacuolar-processing enzyme OS=Citrus sinensis OX=2711 PE=2 SV=1	PF01650	Peptidase C13 family	GO:0006508	proteolysis	GO:0008233	peptidase activity	--	--	KOG1349	Gpi-anchor transamidase
Cluster-3890.3452	2.02586	13.5848	-2.74067	3.56023e-08	7.90578e-06	560	1433407888	RCV13534.1	307	1e-25	hypothetical protein SETIT_2G353800v2 [Setaria italica]	--	--	--	--	--	--	--	--	--	--	--	--	--	PF14369	zinc-ribbon	--	--	GO:0061630	ubiquitin protein ligase activity	--	--	--	--
Cluster-3890.153	0.614268	6.20541	-3.3202	4.01403e-08	8.82778e-06	1165	1585730696	XP_028061424.1	910	2.6e-95	peroxidase 3-like [Camellia sinensis]	CP019094.1	CP019094	126	1.47271e-57	Spirodela polyrhiza strain 9509 chromosome 2 sequence	K00430	E1.11.1.7	peroxidase	http://www.genome.jp/dbget-bin/www_bget?ko:K00430	Q43735	711	1.2e-73	Peroxidase 27 OS=Arabidopsis thaliana OX=3702 GN=PER27 PE=1 SV=1	PF01044//PF00141	Vinculin family//Peroxidase	GO:0006979//GO:0055114//GO:0007155//GO:0006804	response to oxidative stress//oxidation-reduction process//cell adhesion//obsolete peroxidase reaction	GO:0020037//GO:0051015//GO:0004601	heme binding//actin filament binding//peroxidase activity	--	--	--	--
Cluster-3890.2275	28.7478	5.00232	2.52093	4.7922e-08	1.04388e-05	1038	1408186614	RAL46690.1	255	2e-19	hypothetical protein DM860_004969 [Cuscuta australis]	XM_010072341.2	XM_010072341	62	4.9413e-22	PREDICTED: Eucalyptus grandis LOB domain-containing protein 38 (LOC104457394), mRNA	--	--	--	--	Q9SN23	240	4.2e-19	LOB domain-containing protein 38 OS=Arabidopsis thaliana OX=3702 GN=LBD38 PE=1 SV=1	--	--	--	--	--	--	--	--	--	--
Cluster-3890.13720	0.122854	3.19135	-4.61392	5.07099e-08	1.09419e-05	876	695030171	XP_009402535.1	286	4.4e-23	PREDICTED: succinate-semialdehyde dehydrogenase, mitochondrial [Musa acuminata subsp. malaccensis]	--	--	--	--	--	K17761	SSADH	succinate-semialdehyde dehydrogenase, mitochondrial	http://www.genome.jp/dbget-bin/www_bget?ko:K17761	Q9SAK4	265	4.5e-22	Succinate-semialdehyde dehydrogenase, mitochondrial OS=Arabidopsis thaliana OX=3702 GN=ALDH5F1 PE=1 SV=2	PF00171	Aldehyde dehydrogenase family	GO:0055114	oxidation-reduction process	GO:0016491	oxidoreductase activity	--	--	KOG2451	Aldehyde dehydrogenase
Cluster-3890.10027	160.852	30.9637	2.37679	5.19139e-08	1.1097e-05	1235	643724804	KDP34005.1	342	2e-29	hypothetical protein JCGZ_07576 [Jatropha curcas]	XM_022286218.1	XM_022286218	60	7.64493e-21	PREDICTED: Momordica charantia ethylene-responsive transcription factor ERF017-like (LOC111012162), mRNA	--	--	--	--	Q84QC2	306	1.1e-26	Ethylene-responsive transcription factor ERF017 OS=Arabidopsis thaliana OX=3702 GN=ERF017 PE=2 SV=1	PF00847	AP2 domain	GO:0006355	regulation of transcription, DNA-templated	GO:0003700	DNA-binding transcription factor activity	GO:0005667	transcription regulator complex	--	--
Cluster-3890.11593	91.0413	464.097	-2.34973	5.38436e-08	1.14029e-05	1748	1524762676	RQO87363.1	142	4.3e-06	hypothetical protein POPTR_002G231350 [Populus trichocarpa]	XM_022997047.1	XM_022997047	235	5.69331e-118	PREDICTED: Olea europaea var. sylvestris extensin-2-like (LOC111374382), transcript variant X2, mRNA	--	--	--	--	--	--	--	--	PF00475//PF02187	Imidazoleglycerol-phosphate dehydratase//Growth-Arrest-Specific Protein 2 Domain	GO:0000105	histidine biosynthetic process	GO:0008017//GO:0004424	microtubule binding//imidazoleglycerol-phosphate dehydratase activity	GO:0045298	tubulin complex	--	--
Cluster-4369.0	1.10568	8.6749	-2.96307	5.89592e-08	1.23717e-05	628	1344049166	XP_023904723.1	364	2.8e-32	glutaredoxin-C6 [Quercus suber]	XM_028197424.1	XM_028197424	50	1.37352e-15	PREDICTED: Camellia sinensis glutaredoxin-C6-like (LOC114257643), mRNA	K03676	grxC, GLRX, GLRX2	glutaredoxin 3	http://www.genome.jp/dbget-bin/www_bget?ko:K03676	Q8L9S3	335	2.5e-30	Glutaredoxin-C6 OS=Arabidopsis thaliana OX=3702 GN=GRXC6 PE=2 SV=2	PF00462	Glutaredoxin	GO:0045454//GO:0006118	cell redox homeostasis//obsolete electron transport	GO:0015035//GO:0009055	protein disulfide oxidoreductase activity//electron transfer activity	--	--	--	--
Cluster-3890.321	7.98979	1.01313	2.96969	6.27354e-08	1.30444e-05	871	720023491	XP_010263348.1	259	5.9e-20	PREDICTED: protein AIG2 A isoform X3 [Nelumbo nucifera]	--	--	--	--	--	--	--	--	--	A2RVS4	221	5.7e-17	AIG2-like protein C OS=Arabidopsis thaliana OX=3702 GN=AIG2LC PE=1 SV=1	--	--	--	--	--	--	--	--	--	--
Cluster-3890.16778	4.72987	26.9745	-2.50977	6.63078e-08	1.35617e-05	807	1109250202	XP_019199864.1	273	1.3e-21	PREDICTED: PLASMODESMATA CALLOSE-BINDING PROTEIN 3-like isoform X2 [Ipomoea nil]	--	--	--	--	--	--	--	--	--	Q9SD84	258	2.7e-21	PLASMODESMATA CALLOSE-BINDING PROTEIN 2 OS=Arabidopsis thaliana OX=3702 GN=PDCB2 PE=1 SV=1	--	--	--	--	--	--	--	--	--	--
Cluster-3890.180	0.149267	3.1027	-4.30774	6.6409e-08	1.35617e-05	1051	1492063699	XP_008786846.3	695	2e-70	uncharacterized protein LOC103705038 [Phoenix dactylifera]	--	--	--	--	--	--	--	--	--	--	--	--	--	--	--	--	--	--	--	--	--	--	--
Cluster-3890.12111	64.6824	324.704	-2.32754	7.26809e-08	1.45821e-05	2147	947107280	KRH55663.1	1257	2.7e-135	hypothetical protein GLYMA_06G270400 [Glycine max]	XM_021975114.1	XM_021975114	81	2.84696e-32	PREDICTED: Prunus avium polyphenol oxidase, chloroplastic-like (LOC110770889), mRNA	K00422	E1.10.3.1	polyphenol oxidase	http://www.genome.jp/dbget-bin/www_bget?ko:K00422	P43309	1161	1.4e-125	Polyphenol oxidase, chloroplastic OS=Malus domestica OX=3750 PE=1 SV=1	PF12143//PF00264//PF12142	Protein of unknown function (DUF_B2219)//Common central domain of tyrosinase//Polyphenol oxidase middle domain	GO:0006570//GO:0055114//GO:0006118	tyrosine metabolic process//oxidation-reduction process//obsolete electron transport	GO:0016491//GO:0004097	oxidoreductase activity//catechol oxidase activity	--	--	--	--
Cluster-3890.5237	25.6764	131.263	-2.3536	7.26574e-08	1.45821e-05	3303	1142828819	AQK86906.1	847	1.5e-87	Cytochrome P450 98A3 [Zea mays]	XM_010527130.2	XM_010527130	71	1.59539e-26	PREDICTED: Tarenaya hassleriana cytochrome P450 98A3 (LOC104803227), mRNA	K09754	CYP98A, C3'H	coumaroylquinate(coumaroylshikimate) 3'-monooxygenase	http://www.genome.jp/dbget-bin/www_bget?ko:K09754	O48956	845	9.5e-89	Cytochrome P450 98A1 OS=Sorghum bicolor OX=4558 GN=CYP98A1 PE=2 SV=1	PF00067//PF05637	Cytochrome P450//galactosyl transferase GMA12/MNN10 family	GO:0055114	oxidation-reduction process	GO:0016705//GO:0005506//GO:0016757//GO:0020037	oxidoreductase activity, acting on paired donors, with incorporation or reduction of molecular oxygen//iron ion binding//transferase activity, transferring glycosyl groups//heme binding	GO:0016021	integral component of membrane	--	--
Cluster-660.1	0	2.21622	-8.15642	8.20482e-08	1.63183e-05	787	1201321839	OVA20565.1	500	6e-48	Cytochrome P450 [Macleaya cordata]	--	--	--	--	--	--	--	--	--	P24465	463	4.5e-45	Cytochrome P450 71A1 OS=Persea americana OX=3435 GN=CYP71A1 PE=1 SV=2	PF00067	Cytochrome P450	GO:0055114	oxidation-reduction process	GO:0005506//GO:0020037//GO:0016705	iron ion binding//heme binding//oxidoreductase activity, acting on paired donors, with incorporation or reduction of molecular oxygen	--	--	--	--
Cluster-3890.11619	58.0483	11.0811	2.38834	8.34972e-08	1.64634e-05	2124	1204881297	XP_021292156.1	961	5.7e-101	methionine gamma-lyase [Herrania umbratica]	CP019100.1	CP019100	308	1.82399e-158	Spirodela polyrhiza strain 9509 chromosome 8 sequence	K01761	E4.4.1.11	methionine-gamma-lyase	http://www.genome.jp/dbget-bin/www_bget?ko:K01761	Q9SGU9	916	3.6e-97	Methionine gamma-lyase OS=Arabidopsis thaliana OX=3702 GN=MGL PE=1 SV=1	PF01212//PF00155//PF01053	Beta-eliminating lyase//Aminotransferase class I and II//Cys/Met metabolism PLP-dependent enzyme	GO:0006520//GO:0019346//GO:0009058	cellular amino acid metabolic process//transsulfuration//biosynthetic process	GO:0030170//GO:0016829	pyridoxal phosphate binding//lyase activity	--	--	KOG0053	Cystathionine beta-lyases/cystathionine gamma-synthases
Cluster-2934.1	0.429988	4.87568	-3.47962	8.6117e-08	1.68348e-05	1538	695007740	XP_009390428.1	1930	1.8e-213	PREDICTED: probable flavin-containing monooxygenase 1 [Musa acuminata subsp. malaccensis]	XM_009392600.2	XM_009392600	299	1.32324e-153	PREDICTED: Musa acuminata subsp. malaccensis probable flavin-containing monooxygenase 1 (LOC103977159), mRNA	K00485	FMO	dimethylaniline monooxygenase (N-oxide forming)	http://www.genome.jp/dbget-bin/www_bget?ko:K00485	Q9LMA1	1645	7.6e-182	Probable flavin-containing monooxygenase 1 OS=Arabidopsis thaliana OX=3702 GN=FMO1 PE=2 SV=1	PF00743//PF01593//PF07992	Flavin-binding monooxygenase-like//Flavin containing amine oxidoreductase//Pyridine nucleotide-disulphide oxidoreductase	GO:0055114	oxidation-reduction process	GO:0016491//GO:0004499//GO:0050660//GO:0050661	oxidoreductase activity//N,N-dimethylaniline monooxygenase activity//flavin adenine dinucleotide binding//NADP binding	--	--	KOG1399	Flavin-containing monooxygenase
Cluster-3890.7857	607.297	2987.4	-2.2984	9.1407e-08	1.77175e-05	386	485819833	BAN18373.1	668	9.7e-68	chlorophyll a/b-binding protein, partial [Schiedea spergulina]	CP019103.1	CP019103	308	3.0916e-159	Spirodela polyrhiza strain 9509 chromosome 11 sequence	K08912	LHCB1	light-harvesting complex II chlorophyll a/b binding protein 1	http://www.genome.jp/dbget-bin/www_bget?ko:K08912	P07371	658	5.3e-68	Chlorophyll a-b binding protein AB80, chloroplastic OS=Pisum sativum OX=3888 GN=AB80 PE=1 SV=1	PF11421//PF10143	ATP synthase F1 beta subunit//2,3-bisphosphoglycerate-independent phosphoglycerate mutase	GO:0006754//GO:0006007	ATP biosynthetic process//glucose catabolic process	GO:0005524//GO:0003824//GO:0016887//GO:0046537	ATP binding//catalytic activity//ATPase activity//2,3-bisphosphoglycerate-independent phosphoglycerate mutase activity	GO:0000275	mitochondrial proton-transporting ATP synthase complex, catalytic sector F(1)	--	--
Cluster-3890.16330	5.46699	30.0139	-2.45513	9.75047e-08	1.87406e-05	547	1492236281	RLN04455.1	285	3.5e-23	non-specific lipid-transfer protein A-like [Panicum miliaceum]	--	--	--	--	--	--	--	--	--	P19656	278	8.7e-24	Non-specific lipid-transfer protein OS=Zea mays OX=4577 PE=1 SV=1	--	--	--	--	--	--	--	--	--	--
Cluster-3890.10754	9.02974	47.2371	-2.38616	1.05637e-07	2.01344e-05	1218	1098723033	XP_018851834.1	532	1.8e-51	PREDICTED: uncharacterized protein LOC109013993 [Juglans regia]	XM_024014857.1	XM_024014857	36	1.65468e-07	PREDICTED: Quercus suber uncharacterized LOC111983197 (LOC111983197), mRNA	--	--	--	--	--	--	--	--	--	--	--	--	--	--	--	--	--	--
Cluster-3890.2215	17.2609	2.91274	2.56386	1.10671e-07	2.0748e-05	694	--	--	--	--	--	--	--	--	--	--	--	--	--	--	--	--	--	--	--	--	--	--	--	--	--	--	--	--
Cluster-3890.6567	6.71088	35.8691	-2.41681	1.09932e-07	2.0748e-05	1612	672136589	XP_008791997.1	1043	1.3e-110	UDP-glucose:2-hydroxyflavanone C-glucosyltransferase-like [Phoenix dactylifera]	--	--	--	--	--	--	--	--	--	Q5VMI0	901	1.5e-95	UDP-glucose:2-hydroxyflavanone C-glucosyltransferase OS=Oryza sativa subsp. japonica OX=39947 GN=CGT PE=3 SV=1	PF00201	UDP-glucoronosyl and UDP-glucosyl transferase	--	--	GO:0016758	transferase activity, transferring hexosyl groups	--	--	--	--
Cluster-3890.392	4.05417	22.7321	-2.48497	1.16168e-07	2.16016e-05	1675	1147607332	XP_020107662.1	731	2.1e-74	uncharacterized protein LOC109723642 [Ananas comosus]	XM_020230610.1	XM_020230610	52	2.92147e-16	PREDICTED: Ananas comosus uncharacterized LOC109708790 (LOC109708790), mRNA	--	--	--	--	Q9ZT92	589	2.3e-59	RNA demethylase ALKBH10B OS=Arabidopsis thaliana OX=3702 GN=ALKBH10B PE=1 SV=1	--	--	--	--	--	--	--	--	--	--
Cluster-3890.759	0.18428	3.29266	-4.10292	1.51019e-07	2.78558e-05	1388	1091673786	XP_009389960.2	789	3.3e-81	PREDICTED: probable glycosyltransferase At5g03795 isoform X1 [Musa acuminata subsp. malaccensis]	--	--	--	--	--	--	--	--	--	Q9FFN2	492	3.4e-48	Probable glycosyltransferase At5g03795 OS=Arabidopsis thaliana OX=3702 GN=At5g03795 PE=3 SV=2	--	--	--	--	--	--	--	--	--	--
Cluster-3890.9378	49.3491	9.71463	2.34386	1.58628e-07	2.90251e-05	2447	672141814	XP_008794749.1	2173	1.9e-241	subtilisin-like protease SBT5.3 [Phoenix dactylifera]	NM_001152500.2	NM_001152500	41	5.5965e-10	Zea mays uncharacterized LOC100279499 (LOC100279499), mRNA	--	--	--	--	F4JXC5	1977	3.8e-220	Subtilisin-like protease SBT5.4 OS=Arabidopsis thaliana OX=3702 GN=SBT5.4 PE=1 SV=1	PF01960//PF00082	ArgJ family//Subtilase family	GO:0006508//GO:0006526//GO:0042967	proteolysis//arginine biosynthetic process//obsolete acyl-carrier-protein biosynthetic process	GO:0004358//GO:0004252	glutamate N-acetyltransferase activity//serine-type endopeptidase activity	--	--	--	--
Cluster-3890.4328	71.1206	340.34	-2.25851	1.61178e-07	2.92577e-05	451	--	--	--	--	--	--	--	--	--	--	--	--	--	--	--	--	--	--	PF03910	Adenovirus minor core protein PV	--	--	GO:0003677	DNA binding	GO:0019012	virion	--	--
Cluster-3890.2099	5.26735	0.569884	3.19087	1.64271e-07	2.95842e-05	491	--	--	--	--	--	--	--	--	--	--	--	--	--	--	--	--	--	--	--	--	--	--	--	--	--	--	--	--
Cluster-3890.12308	3.31705	18.6162	-2.48581	1.73258e-07	3.0959e-05	453	--	--	--	--	--	--	--	--	--	--	--	--	--	--	--	--	--	--	--	--	--	--	--	--	--	--	--	--
Cluster-3890.16579	2.39565	13.8039	-2.52271	2.52242e-07	4.43791e-05	2038	1216237657	XP_021593310.1	897	1.4e-93	3-hydroxyisobutyryl-CoA hydrolase-like protein 5 [Manihot esculenta]	--	--	--	--	--	K05605	HIBCH	3-hydroxyisobutyryl-CoA hydrolase	http://www.genome.jp/dbget-bin/www_bget?ko:K05605	Q9SHJ8	816	1.3e-85	3-hydroxyisobutyryl-CoA hydrolase-like protein 5 OS=Arabidopsis thaliana OX=3702 GN=At1g06550 PE=1 SV=2	PF05835//PF00378//PF16113	Synaphin protein//Enoyl-CoA hydratase/isomerase//Enoyl-CoA hydratase/isomerase	GO:0006836//GO:0019482//GO:0006552//GO:0006574//GO:0006550	neurotransmitter transport//beta-alanine metabolic process//leucine catabolic process//valine catabolic process//isoleucine catabolic process	GO:0003824//GO:0019905//GO:0003860	catalytic activity//syntaxin binding//3-hydroxyisobutyryl-CoA hydrolase activity	--	--	KOG1684	Enoyl-CoA hydratase
Cluster-3890.3466	2.45707	0.0633205	5.1152	2.50562e-07	4.43791e-05	896	--	--	--	--	--	--	--	--	--	--	--	--	--	--	--	--	--	--	--	--	--	--	--	--	--	--	--	--
Cluster-3890.17412	1.78138	10.8278	-2.59841	2.75712e-07	4.8138e-05	1379	743854664	XP_010941001.1	1631	7.5e-179	GDP-mannose 4,6 dehydratase 1 [Elaeis guineensis]	CP019100.1	CP019100	396	0	Spirodela polyrhiza strain 9509 chromosome 8 sequence	K01711	gmd, GMDS	GDPmannose 4,6-dehydratase	http://www.genome.jp/dbget-bin/www_bget?ko:K01711	P93031	1592	9.5e-176	GDP-mannose 4,6 dehydratase 2 OS=Arabidopsis thaliana OX=3702 GN=MUR1 PE=1 SV=3	PF03678//PF01370	Hexon, adenovirus major coat protein, C-terminal domain//NAD dependent epimerase/dehydratase family	--	--	GO:0050662//GO:0003824	obsolete coenzyme binding//catalytic activity	GO:0019028	viral capsid	KOG1372	GDP-mannose 4,6 dehydratase
Cluster-3890.3830	13.7596	66.1028	-2.26362	2.93227e-07	5.08083e-05	2103	1273154871	PIA36610.1	1374	7.2e-149	hypothetical protein AQUCO_03300072v1 [Aquilegia coerulea]	--	--	--	--	--	K03327	TC.MATE, SLC47A, norM, mdtK, dinF	multidrug resistance protein, MATE family	http://www.genome.jp/dbget-bin/www_bget?ko:K03327	Q9LUH2	1160	1.8e-125	Protein DETOXIFICATION 19 OS=Arabidopsis thaliana OX=3702 GN=DTX19 PE=2 SV=1	PF01554	MatE	GO:0055085//GO:0006810	transmembrane transport//transport	GO:0015297//GO:0042910	antiporter activity//xenobiotic transmembrane transporter activity	GO:0016020	membrane	--	--
Cluster-3890.10345	13.0839	62.8772	-2.26406	3.00633e-07	5.16999e-05	666	743761677	XP_010943479.1	397	4.5e-36	pathogenesis-related protein PRB1-3-like [Elaeis guineensis]	--	--	--	--	--	K13449	PR1	pathogenesis-related protein 1	http://www.genome.jp/dbget-bin/www_bget?ko:K13449	P08299	368	3.9e-34	Pathogenesis-related protein 1A OS=Nicotiana tabacum OX=4097 PE=1 SV=1	--	--	--	--	--	--	--	--	--	--
Cluster-3890.2183	31.9419	6.33205	2.33329	3.10966e-07	5.30778e-05	1512	1557874580	RWR95105.1	955	2e-100	protein ASPARTIC PROTEASE IN GUARD CELL 2-like protein [Cinnamomum micranthum f. kanehirae]	--	--	--	--	--	--	--	--	--	Q8S9J6	872	3.2e-92	Aspartyl protease family protein At5g10770 OS=Arabidopsis thaliana OX=3702 GN=At5g10770 PE=2 SV=1	--	--	--	--	--	--	--	--	--	--
Cluster-3890.13708	10.9954	1.77297	2.62735	3.19474e-07	5.4126e-05	2424	1052184252	XP_017699169.1	2034	2.5e-225	subtilisin-like protease SBT5.4 isoform X1 [Phoenix dactylifera]	--	--	--	--	--	--	--	--	--	F4JXC5	1887	1e-209	Subtilisin-like protease SBT5.4 OS=Arabidopsis thaliana OX=3702 GN=SBT5.4 PE=1 SV=1	PF00082//PF01960	Subtilase family//ArgJ family	GO:0006508//GO:0006526//GO:0042967	proteolysis//arginine biosynthetic process//obsolete acyl-carrier-protein biosynthetic process	GO:0004358//GO:0004252	glutamate N-acetyltransferase activity//serine-type endopeptidase activity	--	--	--	--
Cluster-3890.8066	3184.18	699.818	2.18586	3.35192e-07	5.63714e-05	849	1562655008	RXH95387.1	588	4.1e-58	hypothetical protein DVH24_025071 [Malus domestica]	--	--	--	--	--	K19761	GGACT	gamma-glutamylaminecyclotransferase	http://www.genome.jp/dbget-bin/www_bget?ko:K19761	Q9M8T3	520	1.2e-51	Putative gamma-glutamylcyclotransferase At3g02910 OS=Arabidopsis thaliana OX=3702 GN=At3g02910 PE=2 SV=2	--	--	--	--	--	--	--	--	KOG4450	Uncharacterized conserved protein
Cluster-3890.12883	3.4399	0.253282	3.72309	3.67248e-07	6.08673e-05	1166	--	--	--	--	--	--	--	--	--	--	--	--	--	--	--	--	--	--	--	--	--	--	--	--	--	--	--	--
Cluster-3890.9978	173.577	37.739	2.20122	3.65143e-07	6.08673e-05	4297	836029572	XP_012698493.1	1228	1.3e-131	electron transfer flavoprotein-ubiquinone oxidoreductase, mitochondrial isoform X2 [Setaria italica]	KY529445.1	KY529445	212	8.63864e-105	Santalum album AT2G43400 mRNA, partial sequence	K00311	ETFDH	electron-transferring-flavoprotein dehydrogenase	http://www.genome.jp/dbget-bin/www_bget?ko:K00311	Q337B8	1187	2.7e-128	Electron transfer flavoprotein-ubiquinone oxidoreductase, mitochondrial OS=Oryza sativa subsp. japonica OX=39947 GN=Os10g0516300 PE=3 SV=1	PF01494//PF07992//PF01266//PF02965	FAD binding domain//Pyridine nucleotide-disulphide oxidoreductase//FAD dependent oxidoreductase//Vitamin B12 dependent methionine synthase, activation domain	GO:0055114//GO:0009086	oxidation-reduction process//methionine biosynthetic process	GO:0016491//GO:0071949//GO:0008705	oxidoreductase activity//FAD binding//methionine synthase activity	--	--	KOG2415	Electron transfer flavoprotein ubiquinone oxidoreductase
Cluster-3890.1442	4.97557	0.569884	3.10878	3.92609e-07	6.41411e-05	516	--	--	--	--	--	--	--	--	--	--	--	--	--	--	--	--	--	--	--	--	--	--	--	--	--	--	--	--
Cluster-3890.2686	0.552841	5.00232	-3.15971	3.92609e-07	6.41411e-05	879	1150699139	XP_020260410.1	213	1.3e-14	NDR1/HIN1-like protein 3 [Asparagus officinalis]	--	--	--	--	--	--	--	--	--	--	--	--	--	--	--	--	--	--	--	--	--	--	--
Cluster-3890.15744	2.64135	14.5004	-2.45327	4.20625e-07	6.82307e-05	832	--	--	--	--	--	--	--	--	--	--	--	--	--	--	--	--	--	--	--	--	--	--	--	--	--	--	--	--
Cluster-3890.16500	0.18428	3.03938	-3.98773	4.27064e-07	6.87874e-05	630	1536884	CAA56115.1	320	3.6e-27	trypsin/chymotrypsin inhibitor [Alocasia macrorrhizos]	--	--	--	--	--	--	--	--	--	P35812	319	1.8e-28	Trypsin/chymotrypsin inhibitor OS=Alocasia macrorrhizos OX=4456 PE=1 SV=1	PF00197	Trypsin and protease inhibitor	--	--	GO:0004866	endopeptidase inhibitor activity	--	--	--	--
Cluster-2252.0	1.8428	0	7.89124	5.05952e-07	8.03621e-05	534	339716060	AEJ88277.1	211	1.3e-14	putative 14 kDa proline-rich protein DC2.15 precursor [Wolffia australiana]	--	--	--	--	--	--	--	--	--	Q39176	170	2.8e-11	Lipid transfer protein EARLI 1 OS=Arabidopsis thaliana OX=3702 GN=EARLI1 PE=1 SV=1	--	--	--	--	--	--	--	--	--	--
Cluster-4061.0	1.8428	0	7.89124	5.05952e-07	8.03621e-05	841	1557845391	RWR72779.1	585	8.9e-58	Protein kinase domain-containing protein [Cinnamomum micranthum f. kanehirae]	--	--	--	--	--	K04733	IRAK4	interleukin-1 receptor-associated kinase 4	http://www.genome.jp/dbget-bin/www_bget?ko:K04733	Q9FHG4	411	5.1e-39	Probable L-type lectin-domain containing receptor kinase S.7 OS=Arabidopsis thaliana OX=3702 GN=LECRKS7 PE=2 SV=1	PF07714//PF00069	Protein tyrosine and serine/threonine kinase//Protein kinase domain	GO:0006468	protein phosphorylation	GO:0004672//GO:0005524	protein kinase activity//ATP binding	--	--	--	--
Cluster-3890.15102	3.19419	16.7799	-2.39037	5.21292e-07	8.22276e-05	602	1559666136	RWW88213.1	587	3.7e-58	hypothetical protein BHE74_00002908 [Ensete ventricosum]	--	--	--	--	--	K13449	PR1	pathogenesis-related protein 1	http://www.genome.jp/dbget-bin/www_bget?ko:K13449	P09042	509	1.6e-50	Pathogenesis-related protein 1C OS=Nicotiana tabacum OX=4097 PE=2 SV=3	--	--	--	--	--	--	--	--	--	--
Cluster-3890.4424	29.94	134.724	-2.16957	5.59003e-07	8.7572e-05	1633	672136589	XP_008791997.1	1056	4.2e-112	UDP-glucose:2-hydroxyflavanone C-glucosyltransferase-like [Phoenix dactylifera]	--	--	--	--	--	--	--	--	--	Q5VMI0	892	1.7e-94	UDP-glucose:2-hydroxyflavanone C-glucosyltransferase OS=Oryza sativa subsp. japonica OX=39947 GN=CGT PE=3 SV=1	PF00201	UDP-glucoronosyl and UDP-glucosyl transferase	--	--	GO:0016758	transferase activity, transferring hexosyl groups	--	--	--	--
Cluster-3890.1732	4.54558	0.506564	3.14609	5.82005e-07	9.05552e-05	513	--	--	--	--	--	--	--	--	--	--	--	--	--	--	--	--	--	--	PF00695	Major surface antigen from hepadnavirus	GO:0016032	viral process	--	--	--	--	--	--
Cluster-3890.16365	19.8409	89.7884	-2.17761	5.97872e-07	9.23954e-05	2026	743754950	XP_010926163.1	1026	1.6e-108	aldehyde dehydrogenase family 2 member C4 [Elaeis guineensis]	XM_003569243.4	XM_003569243	128	2.0027e-58	PREDICTED: Brachypodium distachyon aldehyde dehydrogenase family 2 member C4 (LOC100832456), mRNA	K12355	REF1	coniferyl-aldehyde dehydrogenase	http://www.genome.jp/dbget-bin/www_bget?ko:K12355	C5I9X1	985	3.4e-105	Aldehyde dehydrogenase 1 OS=Artemisia annua OX=35608 GN=ALDH1 PE=1 SV=1	PF05893//PF00171	Acyl-CoA reductase (LuxC)//Aldehyde dehydrogenase family	GO:0006118//GO:0055114//GO:0008218	obsolete electron transport//oxidation-reduction process//bioluminescence	GO:0003995//GO:0016491	acyl-CoA dehydrogenase activity//oxidoreductase activity	--	--	KOG2450	Aldehyde dehydrogenase
Cluster-352.0	0.122854	2.59614	-4.31693	6.39568e-07	9.81758e-05	1306	1012363591	KYP74774.1	1351	2.1e-146	Putative transporter arsB [Cajanus cajan]	XM_018631454.1	XM_018631454	138	3.53457e-64	PREDICTED: Raphanus sativus putative transporter arsB (LOC108857464), transcript variant X2, mRNA	--	--	--	--	Q10SY9	656	3.1e-67	Silicon efflux transporter LSI2 OS=Oryza sativa subsp. japonica OX=39947 GN=LSI2 PE=1 SV=1	PF02040//PF00939//PF06450//PF03600	Arsenical pump membrane protein//Sodium:sulfate symporter transmembrane region//Bacterial Na+/H+ antiporter B (NhaB)//Citrate transporter	GO:0006885//GO:0015700//GO:0006814//GO:0055085	regulation of pH//arsenite transport//sodium ion transport//transmembrane transport	GO:0022857//GO:0015105//GO:0015385	transmembrane transporter activity//arsenite transmembrane transporter activity//sodium:proton antiporter activity	GO:0016021//GO:0016020	integral component of membrane//membrane	KOG2639	Sodium sulfate symporter and related arsenite permeases
Cluster-3890.14007	6.51984	0.906749	2.83544	6.51922e-07	9.94051e-05	733	1139783430	ONI17257.1	294	4.3e-24	hypothetical protein PRUPE_3G148800 [Prunus persica]	CP019101.1	CP019101	67	5.71858e-25	Spirodela polyrhiza strain 9509 chromosome 9 sequence	--	--	--	--	Q8LFD1	263	6.4e-22	Putative lipid phosphate phosphatase 3, chloroplastic OS=Arabidopsis thaliana OX=3702 GN=LPP3 PE=2 SV=1	--	--	--	--	--	--	--	--	KOG3030	Lipid phosphate phosphatase and related enzymes of the PAP2 family
Cluster-3890.17134	1.04426	7.09189	-2.75455	6.61016e-07	0.000100124	1386	1098777709	XP_018849417.1	1109	2.6e-118	PREDICTED: aspartyl protease AED3-like [Juglans regia]	--	--	--	--	--	--	--	--	--	O04496	802	3.9e-84	Aspartyl protease AED3 OS=Arabidopsis thaliana OX=3702 GN=AED3 PE=1 SV=1	--	--	--	--	--	--	--	--	--	--
Cluster-3890.14696	9.02974	1.51969	2.56477	6.95422e-07	0.000104643	1852	672130905	XP_008789001.1	1473	2.1e-160	exocyst complex component EXO70H1-like [Phoenix dactylifera]	--	--	--	--	--	K07195	EXOC7, EXO70	exocyst complex component 7	http://www.genome.jp/dbget-bin/www_bget?ko:K07195	Q8VY27	1121	5.3e-121	Exocyst complex component EXO70H1 OS=Arabidopsis thaliana OX=3702 GN=EXO70H1 PE=1 SV=1	PF03081	Exo70 exocyst complex subunit	GO:0006887	exocytosis	--	--	GO:0000145	exocyst	--	--
Cluster-3890.498	2.08851	11.461	-2.45179	7.48843e-07	0.000111945	383	460372897	XP_004232259.1	356	1.5e-31	uncharacterized protein LOC101265497 [Solanum lycopersicum]	--	--	--	--	--	--	--	--	--	--	--	--	--	--	--	--	--	--	--	--	--	--	--
Cluster-3890.16380	2.45707	13.1073	-2.41165	7.66585e-07	0.000113853	1552	672134913	XP_008791113.1	1598	5.7e-175	omega-hydroxypalmitate O-feruloyl transferase-like [Phoenix dactylifera]	CP019093.1	CP019093	243	1.80255e-122	Spirodela polyrhiza strain 9509 chromosome 1 sequence	K15400	HHT1	omega-hydroxypalmitate O-feruloyl transferase	http://www.genome.jp/dbget-bin/www_bget?ko:K15400	Q94CD1	1422	5.5e-156	Omega-hydroxypalmitate O-feruloyl transferase OS=Arabidopsis thaliana OX=3702 GN=HHT1 PE=1 SV=1	PF02458	Transferase family	--	--	GO:0016747	transferase activity, transferring acyl groups other than amino-acyl groups	--	--	--	--
Cluster-3890.12272	1.71995	9.81467	-2.50719	7.89688e-07	0.000116527	2276	743810700	XP_010928964.1	1840	7.2e-203	uncharacterized protein LOC105050579 [Elaeis guineensis]	XM_002282935.4	XM_002282935	66	6.58524e-24	PREDICTED: Vitis vinifera putative endo-1,3(4)-beta-glucanase 2 (LOC100261655), mRNA	K01180	E3.2.1.6	endo-1,3(4)-beta-glucanase	http://www.genome.jp/dbget-bin/www_bget?ko:K01180	D4AZ24	307	1.6e-26	Probable endo-1,3(4)-beta-glucanase ARB_01444 OS=Arthroderma benhamiae (strain ATCC MYA-4681 / CBS 112371) OX=663331 GN=ARB_01444 PE=1 SV=1	--	--	--	--	--	--	--	--	KOG2254	Predicted endo-1,3-beta-glucanase
Cluster-3890.12441	5.09843	24.695	-2.27435	7.97914e-07	0.000116986	655	1150136118	XP_020211627.1	344	6.1e-30	histone H2AX-like [Cajanus cajan]	XM_018637562.1	XM_018637562	57	1.84416e-19	PREDICTED: Raphanus sativus histone H2A.6-like (LOC108863214), transcript variant X5, mRNA	K11251	H2A	histone H2A	http://www.genome.jp/dbget-bin/www_bget?ko:K11251	P35063	335	2.6e-30	Histone H2AX OS=Picea abies OX=3329 PE=2 SV=1	PF00841//PF00125	Sperm histone P2//Core histone H2A/H2B/H3/H4	GO:0006323//GO:0007286	DNA packaging//spermatid development	GO:0003677	DNA binding	GO:0000786	nucleosome	KOG1756	Histone 2A
Cluster-3890.9975	39.8722	173.809	-2.12383	8.49208e-07	0.000123714	839	1322406312	PLY89513.1	668	2.1e-67	hypothetical protein LSAT_4X92001 [Lactuca sativa]	XM_006654238.2	XM_006654238	86	1.80503e-35	PREDICTED: Oryza brachyantha pectinesterase-like (LOC102723054), mRNA	K01051	E3.1.1.11	pectinesterase	http://www.genome.jp/dbget-bin/www_bget?ko:K01051	O49006	649	1.3e-66	Pectinesterase/pectinesterase inhibitor 3 OS=Arabidopsis thaliana OX=3702 GN=PME3 PE=1 SV=2	PF01095	Pectinesterase	GO:0005985//GO:0005982//GO:0042545	sucrose metabolic process//starch metabolic process//cell wall modification	GO:0030599	pectinesterase activity	--	--	--	--
Cluster-3890.12248	0.122854	2.53282	-4.28141	8.6112e-07	0.000124655	804	--	--	--	--	--	--	--	--	--	--	--	--	--	--	--	--	--	--	--	--	--	--	--	--	--	--	--	--
Cluster-3890.6744	247.344	1057.37	-2.09585	9.39377e-07	0.000135128	1460	527205461	EPS71324.1	345	1e-29	hypothetical protein M569_03434, partial [Genlisea aurea]	--	--	--	--	--	K09873	TIP	aquaporin TIP	http://www.genome.jp/dbget-bin/www_bget?ko:K09873	O82316	310	4.6e-27	Aquaporin TIP4-1 OS=Arabidopsis thaliana OX=3702 GN=TIP4-1 PE=2 SV=1	PF00230	Major intrinsic protein	GO:0055085//GO:0006810	transmembrane transport//transport	GO:0015267	channel activity	GO:0016020	membrane	--	--
Cluster-3890.541	2.76421	14.2471	-2.36246	9.8834e-07	0.000141283	1369	1557874353	RWR94878.1	1159	4e-124	agmatine coumaroyltransferase-2-like protein [Cinnamomum micranthum f. kanehirae]	--	--	--	--	--	K13065	E2.3.1.133, HCT	shikimate O-hydroxycinnamoyltransferase	http://www.genome.jp/dbget-bin/www_bget?ko:K13065	Q338X7	853	4.6e-90	Tryptamine hydroxycinnamoyltransferase 1 OS=Oryza sativa subsp. japonica OX=39947 GN=THT1 PE=1 SV=1	PF02458	Transferase family	--	--	GO:0016747	transferase activity, transferring acyl groups other than amino-acyl groups	--	--	--	--
Cluster-3890.6537	544.423	128.161	2.08671	1.0715e-06	0.00015222	2422	1150709779	XP_020265533.1	885	4.2e-92	ubiquinol oxidase 4, chloroplastic/chromoplastic [Asparagus officinalis]	--	--	--	--	--	K17893	AOX1, AOX2	ubiquinol oxidase	http://www.genome.jp/dbget-bin/www_bget?ko:K17893	Q56X52	831	2.9e-87	Ubiquinol oxidase 4, chloroplastic/chromoplastic OS=Arabidopsis thaliana OX=3702 GN=AOX4 PE=1 SV=2	PF01786	Alternative oxidase	GO:0006118//GO:0055114	obsolete electron transport//oxidation-reduction process	GO:0009916	alternative oxidase activity	--	--	--	--
Cluster-3890.6461	24.9946	5.31892	2.23075	1.08275e-06	0.000152869	552	823248202	XP_012456773.1	159	1.5e-08	PREDICTED: calcium-dependent protein kinase 28-like isoform X2 [Gossypium raimondii]	--	--	--	--	--	K13412	CPK	calcium-dependent protein kinase	http://www.genome.jp/dbget-bin/www_bget?ko:K13412	Q7XJR9	137	2e-07	Calcium-dependent protein kinase 16 OS=Arabidopsis thaliana OX=3702 GN=CPK16 PE=1 SV=1	PF13405//PF13202//PF13499//PF00036	EF-hand domain//EF hand//EF-hand domain pair//EF hand	--	--	GO:0005509	calcium ion binding	--	--	--	--
Cluster-3890.9562	29.7048	6.39537	2.21422	1.13043e-06	0.000158621	937	--	--	--	--	--	--	--	--	--	--	--	--	--	--	--	--	--	--	--	--	--	--	--	--	--	--	--	--
Cluster-3890.6517	169.538	39.7653	2.09181	1.22588e-06	0.000170965	1126	1273172602	PIA54317.1	452	3.2e-42	hypothetical protein AQUCO_00900692v1 [Aquilegia coerulea]	--	--	--	--	--	--	--	--	--	Q84TG3	372	2.3e-34	E3 ubiquitin-protein ligase PUB23 OS=Arabidopsis thaliana OX=3702 GN=PUB23 PE=1 SV=1	PF04564//PF11789//PF00514	U-box domain//Zinc-finger of the MIZ type in Nse subunit//Armadillo/beta-catenin-like repeat	GO:0016567	protein ubiquitination	GO:0004842//GO:0008270//GO:0005515	ubiquitin-protein transferase activity//zinc ion binding//protein binding	--	--	--	--
Cluster-3890.14443	4.85272	0.633205	2.92271	1.27663e-06	0.000175898	1048	--	--	--	--	--	--	--	--	--	--	--	--	--	--	--	--	--	--	PF08727	Poliovirus 3A protein like	GO:0006508//GO:0006144	proteolysis//purine nucleobase metabolic process	GO:0003968//GO:0017111//GO:0004197	RNA-directed 5'-3' RNA polymerase activity//nucleoside-triphosphatase activity//cysteine-type endopeptidase activity	GO:0031379	RNA-directed RNA polymerase complex	--	--
Cluster-4903.0	0.245707	3.1027	-3.61708	1.27052e-06	0.000175898	599	--	--	--	--	--	--	--	--	--	--	--	--	--	--	--	--	--	--	--	--	--	--	--	--	--	--	--	--
Cluster-3890.8179	668.385	159.378	2.06818	1.29769e-06	0.000177729	2312	672178334	XP_008809298.1	1651	6e-181	protein ALP1-like [Phoenix dactylifera]	XM_024312086.1	XM_024312086	248	4.49001e-125	PREDICTED: Rosa chinensis protein ALP1-like (LOC112174346), mRNA	--	--	--	--	Q9M2U3	344	8.2e-31	Protein ALP1-like OS=Arabidopsis thaliana OX=3702 GN=At3g55350 PE=2 SV=1	PF04827	Plant transposon protein	--	--	GO:0016788	hydrolase activity, acting on ester bonds	--	--	--	--
Cluster-3890.10012	141.897	33.4889	2.08283	1.40892e-06	0.000190679	1773	1476587592	BBE08044.1	1642	5.1e-180	carotenoid cleavage dioxygenase 4 [Lilium formosanum x Lilium longiflorum]	LC383786.1	LC383786	121	1.36114e-54	Lilium formosanum x Lilium longiflorum F1 Augusta CCD4 mRNA for carotenoid cleavage dioxygenase 4, complete cds	K09840	NCED	9-cis-epoxycarotenoid dioxygenase	http://www.genome.jp/dbget-bin/www_bget?ko:K09840	Q6YVJ0	1532	1.1e-168	9-cis-epoxycarotenoid dioxygenase NCED1, chloroplastic OS=Oryza sativa subsp. japonica OX=39947 GN=NCED1 PE=2 SV=1	PF03055	Retinal pigment epithelial membrane protein	GO:0055114	oxidation-reduction process	GO:0016702	oxidoreductase activity, acting on single donors with incorporation of molecular oxygen, incorporation of two atoms of oxygen	--	--	--	--
Cluster-3890.14903	22.7279	4.87568	2.21898	1.40728e-06	0.000190679	2578	1052184252	XP_017699169.1	2064	8.7e-229	subtilisin-like protease SBT5.4 isoform X1 [Phoenix dactylifera]	--	--	--	--	--	--	--	--	--	F4JXC5	1865	3.9e-207	Subtilisin-like protease SBT5.4 OS=Arabidopsis thaliana OX=3702 GN=SBT5.4 PE=1 SV=1	PF00082//PF08095//PF02805	Subtilase family//Hefutoxin family//Metal binding domain of Ada	GO:0006355//GO:0006281//GO:0006508//GO:0009405	regulation of transcription, DNA-templated//DNA repair//proteolysis//pathogenesis	GO:0008168//GO:0003677//GO:0008270//GO:0004252	methyltransferase activity//DNA binding//zinc ion binding//serine-type endopeptidase activity	GO:0005576	extracellular region	--	--
Cluster-3890.8137	10.7497	1.96293	2.44854	1.42596e-06	0.00019185	1618	672188593	XP_008813620.1	839	6e-87	cytochrome P450 71A1-like [Phoenix dactylifera]	--	--	--	--	--	K20617	CYP71A	cytochrome P450 family 71 subfamily A	http://www.genome.jp/dbget-bin/www_bget?ko:K20617	O81970	765	8.8e-80	Cytochrome P450 71A9 OS=Glycine max OX=3847 GN=CYP71A9 PE=2 SV=1	PF00067	Cytochrome P450	GO:0055114	oxidation-reduction process	GO:0016705//GO:0020037//GO:0005506	oxidoreductase activity, acting on paired donors, with incorporation or reduction of molecular oxygen//heme binding//iron ion binding	--	--	--	--
Cluster-3890.5305	6.75695	1.07645	2.64135	1.43753e-06	0.000192276	481	1147595946	XP_020101866.1	271	1.3e-21	mannose-specific lectin-like [Ananas comosus]	--	--	--	--	--	--	--	--	--	P30617	230	2.8e-18	Mannose-specific lectin OS=Galanthus nivalis OX=4670 PE=1 SV=1	PF06298//PF00646	Photosystem II protein Y (PsbY)//F-box domain	GO:0015979	photosynthesis	GO:0030145//GO:0005515	manganese ion binding//protein binding	GO:0016021//GO:0009523	integral component of membrane//photosystem II	--	--
Cluster-3890.6243	3.00991	14.9436	-2.30876	1.45225e-06	0.000193115	714	326487782	BAK05563.1	179	9.1e-11	predicted protein [Hordeum vulgare subsp. vulgare]	--	--	--	--	--	--	--	--	--	Q01595	149	1e-08	Cortical cell-delineating protein OS=Zea mays OX=4577 PE=2 SV=1	--	--	--	--	--	--	--	--	--	--
Cluster-3890.4895	49.9406	11.461	2.12272	1.56899e-06	0.000207434	1925	1492230181	RLM98660.1	549	3.1e-53	putative leucine-rich repeat receptor-like protein kinase [Panicum miliaceum]	--	--	--	--	--	--	--	--	--	C0LGD6	445	1.3e-42	Probable LRR receptor-like serine/threonine-protein kinase At1g05700 OS=Arabidopsis thaliana OX=3702 GN=At1g05700 PE=1 SV=1	--	--	--	--	--	--	--	--	--	--
Cluster-3890.15176	9.11205	39.8203	-2.12671	1.80745e-06	0.000237587	1681	672136589	XP_008791997.1	1017	1.4e-107	UDP-glucose:2-hydroxyflavanone C-glucosyltransferase-like [Phoenix dactylifera]	--	--	--	--	--	--	--	--	--	C3W7B0	913	6.3e-97	UDP-glucose:2-hydroxyflavanone C-glucosyltransferase OS=Oryza sativa subsp. indica OX=39946 GN=CGT PE=1 SV=1	PF00201	UDP-glucoronosyl and UDP-glucosyl transferase	--	--	GO:0016758	transferase activity, transferring hexosyl groups	--	--	--	--
Cluster-3890.17406	0.491415	4.17915	-3.06818	1.85959e-06	0.000241662	517	--	--	--	--	--	--	--	--	--	--	--	--	--	--	--	--	--	--	--	--	--	--	--	--	--	--	--	--
Cluster-3890.17543	0.491415	4.17915	-3.06818	1.85959e-06	0.000241662	1311	1492112856	XP_026656868.1	1461	3.7e-159	multicopper oxidase LPR1 homolog 1-like [Phoenix dactylifera]	CP019103.1	CP019103	74	1.34104e-28	Spirodela polyrhiza strain 9509 chromosome 11 sequence	--	--	--	--	Q9AWU4	1370	5e-150	Multicopper oxidase LPR1 homolog 1 OS=Oryza sativa subsp. japonica OX=39947 GN=LPR1 PE=2 SV=1	PF07732//PF07731//PF00394	Multicopper oxidase//Multicopper oxidase//Multicopper oxidase	GO:0055114	oxidation-reduction process	GO:0016491//GO:0005507	oxidoreductase activity//copper ion binding	--	--	--	--
Cluster-3890.365	3.62418	17.1598	-2.24086	1.98958e-06	0.000257095	1615	1585654256	XP_028061393.1	1618	2.8e-177	cytochrome P450 84A1-like [Camellia sinensis]	CP019106.1	CP019106	200	1.50203e-98	Spirodela polyrhiza strain 9509 chromosome 14 sequence	K09755	CYP84A, F5H	ferulate-5-hydroxylase	http://www.genome.jp/dbget-bin/www_bget?ko:K09755	Q42600	1536	3.5e-169	Cytochrome P450 84A1 OS=Arabidopsis thaliana OX=3702 GN=CYP84A1 PE=1 SV=1	PF00067//PF03547//PF00424	Cytochrome P450//Membrane transport protein//REV protein (anti-repression trans-activator protein)	GO:0055114//GO:0055085//GO:0006355	oxidation-reduction process//transmembrane transport//regulation of transcription, DNA-templated	GO:0016705//GO:0005506//GO:0020037//GO:0003700	oxidoreductase activity, acting on paired donors, with incorporation or reduction of molecular oxygen//iron ion binding//heme binding//DNA-binding transcription factor activity	GO:0005667//GO:0016021//GO:0042025	transcription regulator complex//integral component of membrane//host cell nucleus	--	--
Cluster-3890.8435	20.9465	4.55907	2.19797	2.02073e-06	0.000259653	752	1387772735	PWA46216.1	198	6e-13	14 kDa proline-rich protein DC2.15 [Artemisia annua]	--	--	--	--	--	--	--	--	--	Q9SU34	155	2.2e-09	pEARLI1-like lipid transfer protein 2 OS=Arabidopsis thaliana OX=3702 GN=At4g12490 PE=2 SV=1	--	--	--	--	--	--	--	--	--	--
Cluster-3890.7855	644.649	158.934	2.02003	2.19086e-06	0.00027994	2422	222625769	EEE59901.1	194	5.6e-12	hypothetical protein OsJ_12513 [Oryza sativa Japonica Group]	--	--	--	--	--	--	--	--	--	Q75KV9	194	2.1e-13	Transcription factor BHLH148 OS=Oryza sativa subsp. japonica OX=39947 GN=BHLH148 PE=1 SV=1	PF00010//PF00865	Helix-loop-helix DNA-binding domain//Osteopontin	GO:0001503//GO:0007155	ossification//cell adhesion	GO:0046983	protein dimerization activity	--	--	--	--
Cluster-3890.16721	7.06408	1.20309	2.54603	2.24644e-06	0.000285448	1318	1366049717	XP_024174072.1	705	1.7e-71	purine permease 3-like [Rosa chinensis]	--	--	--	--	--	--	--	--	--	Q9FZ96	596	2.8e-60	Purine permease 1 OS=Arabidopsis thaliana OX=3702 GN=PUP1 PE=1 SV=1	PF04142//PF00892//PF11837	Nucleotide-sugar transporter//EamA-like transporter family//Domain of unknown function (DUF3357)	GO:0005985//GO:0006012//GO:0005982//GO:0090481	sucrose metabolic process//galactose metabolic process//starch metabolic process//pyrimidine nucleotide-sugar transmembrane transport	GO:0004564//GO:0004575//GO:0015165	beta-fructofuranosidase activity//sucrose alpha-glucosidase activity//pyrimidine nucleotide-sugar transmembrane transporter activity	GO:0000139//GO:0017177//GO:0016020//GO:0016021	Golgi membrane//glucosidase II complex//membrane//integral component of membrane	--	--
Cluster-3890.642	2.57993	12.6008	-2.28465	2.51508e-06	0.000317818	634	565384746	XP_006358285.1	333	1.1e-28	PREDICTED: cucumber peeling cupredoxin-like [Solanum tuberosum]	--	--	--	--	--	--	--	--	--	P42849	256	3.6e-21	Umecyanin OS=Armoracia rusticana OX=3704 PE=1 SV=1	PF02298	Plastocyanin-like domain	GO:0006118	obsolete electron transport	GO:0009055	electron transfer activity	--	--	--	--
Cluster-2384.0	1.98409	0.0633205	4.80783	2.58666e-06	0.000323291	678	1340514246	XP_023737830.1	277	3.7e-22	protein RADIALIS-like 3 [Lactuca sativa]	--	--	--	--	--	--	--	--	--	Q6NNN0	266	2.7e-22	Protein RADIALIS-like 3 OS=Arabidopsis thaliana OX=3702 GN=RL3 PE=2 SV=1	--	--	--	--	--	--	--	--	--	--
Cluster-3890.2061	2.01787	0.0367259	5.50777	2.58666e-06	0.000323291	457	1279083552	XP_022845985.1	311	2.9e-26	flavonoid 3'-monooxygenase-like [Olea europaea var. sylvestris]	--	--	--	--	--	--	--	--	--	H2DH18	196	2.3e-14	Cytochrome P450 CYP736A12 OS=Panax ginseng OX=4054 PE=2 SV=1	PF00067	Cytochrome P450	GO:0055114	oxidation-reduction process	GO:0016705//GO:0005506//GO:0020037	oxidoreductase activity, acting on paired donors, with incorporation or reduction of molecular oxygen//iron ion binding//heme binding	--	--	--	--
Cluster-3890.9743	44.2887	177.551	-2.00303	3.08598e-06	0.0003836	1637	587915213	EXC02963.1	1658	6.6e-182	6-phosphogluconate dehydrogenase [Morus notabilis]	XM_008813156.3	XM_008813156	328	1.06628e-169	PREDICTED: Phoenix dactylifera 6-phosphogluconate dehydrogenase, decarboxylating 1, chloroplastic-like (LOC103722557), mRNA	K00033	PGD, gnd, gntZ	6-phosphogluconate dehydrogenase	http://www.genome.jp/dbget-bin/www_bget?ko:K00033	Q9SH69	1598	2.3e-176	6-phosphogluconate dehydrogenase, decarboxylating 1, chloroplastic OS=Arabidopsis thaliana OX=3702 GN=PGD1 PE=1 SV=1	PF02254//PF00393//PF03446//PF02737	TrkA-N domain//6-phosphogluconate dehydrogenase, C-terminal domain//NAD binding domain of 6-phosphogluconate dehydrogenase//3-hydroxyacyl-CoA dehydrogenase, NAD binding domain	GO:0006552//GO:0019521//GO:0006574//GO:0055114//GO:0006554//GO:0006098//GO:0006813//GO:0006633//GO:0006550//GO:0018874//GO:0006568//GO:0006631	leucine catabolic process//D-gluconate metabolic process//valine catabolic process//oxidation-reduction process//lysine catabolic process//pentose-phosphate shunt//potassium ion transport//fatty acid biosynthetic process//isoleucine catabolic process//benzoate metabolic process//tryptophan metabolic process//fatty acid metabolic process	GO:0016491//GO:0003857//GO:0004616//GO:0050661	oxidoreductase activity//3-hydroxyacyl-CoA dehydrogenase activity//phosphogluconate dehydrogenase (decarboxylating) activity//NADP binding	--	--	KOG2653	6-phosphogluconate dehydrogenase
Cluster-3890.9866	76.8536	303.923	-1.98341	3.41084e-06	0.00042169	1561	1371515978	PSS12119.1	477	5.5e-45	FAD-dependent urate hydroxylase [Actinidia chinensis var. chinensis]	--	--	--	--	--	--	--	--	--	O81816	395	6.8e-37	Monooxygenase 2 OS=Arabidopsis thaliana OX=3702 GN=MO2 PE=2 SV=1	PF01266//PF07992//PF01494//PF08491	FAD dependent oxidoreductase//Pyridine nucleotide-disulphide oxidoreductase//FAD binding domain//Squalene epoxidase	GO:0006694//GO:0016114//GO:0055114	steroid biosynthetic process//terpenoid biosynthetic process//oxidation-reduction process	GO:0050660//GO:0071949//GO:0004506//GO:0016491	flavin adenine dinucleotide binding//FAD binding//squalene monooxygenase activity//oxidoreductase activity	GO:0016021	integral component of membrane	--	--
Cluster-3890.11896	31.2663	7.34518	2.08857	3.48633e-06	0.000428706	536	514801241	XP_004975530.1	269	2.5e-21	uncharacterized protein At4g22758 [Setaria italica]	--	--	--	--	--	--	--	--	--	Q56XJ7	177	4.4e-12	Uncharacterized protein At4g22758 OS=Arabidopsis thaliana OX=3702 GN=At4g22758 PE=2 SV=1	--	--	--	--	--	--	--	--	--	--
Cluster-3890.13835	30.6575	7.21853	2.08527	3.60902e-06	0.000436749	648	743762302	XP_010907416.1	149	2.5e-07	uncharacterized protein LOC105034087 [Elaeis guineensis]	--	--	--	--	--	--	--	--	--	--	--	--	--	PF05393//PF06017	Human adenovirus early E3A glycoprotein//Unconventional myosin tail, actin- and lipid-binding	--	--	GO:0003774	motor activity	GO:0016459//GO:0016021	myosin complex//integral component of membrane	--	--
Cluster-3890.290	0	1.58301	-7.67301	3.60565e-06	0.000436749	433	643706669	KDP22652.1	329	2.2e-28	hypothetical protein JCGZ_02494 [Jatropha curcas]	--	--	--	--	--	--	--	--	--	--	--	--	--	--	--	--	--	--	--	--	--	--	--
Cluster-3890.4989	31.4505	7.42623	2.08123	3.58398e-06	0.000436749	1531	1269990029	XP_022746185.1	254	3.9e-19	acyl-coenzyme A oxidase 4, peroxisomal-like isoform X2 [Durio zibethinus]	--	--	--	--	--	K00232	E1.3.3.6, ACOX1, ACOX3	acyl-CoA oxidase	http://www.genome.jp/dbget-bin/www_bget?ko:K00232	Q96329	224	4.5e-17	Acyl-coenzyme A oxidase 4, peroxisomal OS=Arabidopsis thaliana OX=3702 GN=ACX4 PE=1 SV=1	PF02771	Acyl-CoA dehydrogenase, N-terminal domain	GO:0055114	oxidation-reduction process	GO:0016627//GO:0050660	oxidoreductase activity, acting on the CH-CH group of donors//flavin adenine dinucleotide binding	--	--	--	--
Cluster-3890.6699	12.0397	2.4695	2.28189	3.63147e-06	0.000437153	1483	1045358655	GAU50736.1	163	1.4e-08	hypothetical protein TSUD_28790, partial [Trifolium subterraneum]	--	--	--	--	--	K01968	E6.4.1.4A	3-methylcrotonyl-CoA carboxylase alpha subunit	http://www.genome.jp/dbget-bin/www_bget?ko:K01968	Q42523	141	1.8e-07	Methylcrotonoyl-CoA carboxylase subunit alpha, mitochondrial OS=Arabidopsis thaliana OX=3702 GN=MCCA PE=1 SV=2	--	--	--	--	--	--	--	--	--	--
Cluster-3890.11512	22.5436	5.19228	2.11662	3.68156e-06	0.000440862	1395	1179516055	XP_020679954.1	384	3e-34	cytochrome b561 and DOMON domain-containing protein At5g47530 [Dendrobium catenatum]	--	--	--	--	--	--	--	--	--	Q9SV71	284	4.5e-24	Cytochrome b561 and DOMON domain-containing protein At4g12980 OS=Arabidopsis thaliana OX=3702 GN=At4g12980 PE=2 SV=1	--	--	--	--	--	--	--	--	--	--
Cluster-3890.2737	1.71995	8.80155	-2.35014	3.7515e-06	0.000446897	519	1201314200	OVA13916.1	232	4.7e-17	hypothetical protein BVC80_1781g56 [Macleaya cordata]	--	--	--	--	--	--	--	--	--	--	--	--	--	--	--	--	--	--	--	--	--	--	--
Cluster-3890.3145	2.57993	0.189961	3.70989	3.889e-06	0.000460877	1039	--	--	--	--	--	--	--	--	--	--	--	--	--	--	--	--	--	--	--	--	--	--	--	--	--	--	--	--
Cluster-3890.7365	413.587	105.935	1.96493	4.04448e-06	0.000476832	678	1572920096	RZC07584.1	308	9.5e-26	Ethylene-responsive transcription factor ERF114 isoform C [Glycine soja]	--	--	--	--	--	--	--	--	--	Q7G1L2	266	2.7e-22	Ethylene-responsive transcription factor RAP2-6 OS=Arabidopsis thaliana OX=3702 GN=RAP2-6 PE=2 SV=2	PF00847//PF13741	AP2 domain//Mitochondrial ribosomal protein S25	GO:0006355//GO:0042254	regulation of transcription, DNA-templated//ribosome biogenesis	GO:0003700//GO:0003735	DNA-binding transcription factor activity//structural constituent of ribosome	GO:0005667//GO:0005840//GO:0005763	transcription regulator complex//ribosome//mitochondrial small ribosomal subunit	--	--
Cluster-3890.5052	48.096	11.7776	2.02915	4.14375e-06	0.00048603	1927	--	--	--	--	--	--	--	--	--	--	--	--	--	--	--	--	--	--	--	--	--	--	--	--	--	--	--	--
Cluster-3890.2523	0.552841	4.17915	-2.90076	4.33464e-06	0.000505826	414	223545608	EEF47112.1	233	2.9e-17	conserved hypothetical protein [Ricinus communis]	--	--	--	--	--	--	--	--	--	--	--	--	--	PF07648//PF00050	Kazal-type serine protease inhibitor domain//Kazal-type serine protease inhibitor domain	--	--	GO:0005515	protein binding	--	--	--	--
Cluster-3890.2012	34.2762	8.3583	2.03491	5.05683e-06	0.000587106	509	695049015	XP_009412430.1	241	4.2e-18	PREDICTED: uncharacterized protein LOC103993915 [Musa acuminata subsp. malaccensis]	FP099453.1	FP099453	106	8.14478e-47	Phyllostachys edulis cDNA clone: bphylf002n09, full insert sequence	--	--	--	--	--	--	--	--	PF14369//PF03243	zinc-ribbon//Alkylmercury lyase	GO:0046413	organomercury catabolic process	GO:0018836//GO:0061630	alkylmercury lyase activity//ubiquitin protein ligase activity	--	--	--	--
Cluster-3890.6903	13.7977	55.0597	-1.99596	5.0924e-06	0.000588249	411	168296	AAA33396.1	290	7e-24	light-harvesting chlorophyll a/b protein precursor [Lemna gibba]	CP019094.1	CP019094	138	1.05268e-64	Spirodela polyrhiza strain 9509 chromosome 2 sequence	K08912	LHCB1	light-harvesting complex II chlorophyll a/b binding protein 1	http://www.genome.jp/dbget-bin/www_bget?ko:K08912	P12333	273	2.5e-23	Chlorophyll a-b binding protein, chloroplastic OS=Spinacia oleracea OX=3562 PE=1 SV=1	--	--	--	--	--	--	--	--	--	--
Cluster-3890.15028	24.4694	95.6525	-1.96648	5.27698e-06	0.000606508	420	--	--	--	--	--	--	--	--	--	--	--	--	--	--	--	--	--	--	PF09117	MiAMP1	GO:0006952//GO:0045926	defense response//negative regulation of growth	--	--	--	--	--	--
Cluster-3890.1571	2.02709	9.81847	-2.2717	5.30414e-06	0.000606582	1986	1150687025	XP_020254685.1	1485	9.2e-162	protein ZINC INDUCED FACILITATOR-LIKE 1-like isoform X2 [Asparagus officinalis]	CP019097.1	CP019097	67	1.59411e-24	Spirodela polyrhiza strain 9509 chromosome 5 sequence	--	--	--	--	Q94BZ1	1321	3.6e-144	Protein ZINC INDUCED FACILITATOR-LIKE 1 OS=Arabidopsis thaliana OX=3702 GN=ZIFL1 PE=2 SV=1	PF07690//PF00083	Major Facilitator Superfamily//Sugar (and other) transporter	GO:0055085	transmembrane transport	GO:0022857	transmembrane transporter activity	GO:0016021	integral component of membrane	KOG2615	Permease of the major facilitator superfamily
Cluster-3890.2804	28.9935	7.02857	2.04321	5.82005e-06	0.000656325	1923	672183568	XP_008812066.1	459	8.3e-43	uncharacterized protein LOC103723050 [Phoenix dactylifera]	--	--	--	--	--	--	--	--	--	--	--	--	--	--	--	--	--	--	--	--	--	--	--
Cluster-3890.5956	67.3238	17.1598	1.97159	5.8252e-06	0.000656325	514	339716060	AEJ88277.1	243	2.5e-18	putative 14 kDa proline-rich protein DC2.15 precursor [Wolffia australiana]	--	--	--	--	--	--	--	--	--	--	--	--	--	--	--	--	--	--	--	--	--	--	--
Cluster-3890.9593	92.4646	23.7452	1.96091	5.77745e-06	0.000656325	1928	--	--	--	--	--	--	--	--	--	--	--	--	--	--	--	--	--	--	PF00646//PF12937	F-box domain//F-box-like	--	--	GO:0005515	protein binding	--	--	--	--
Cluster-3890.12127	39.3746	9.81467	2.00339	5.97991e-06	0.000670454	1720	720025015	XP_010263813.1	1552	1.4e-169	PREDICTED: uncharacterized protein LOC104601983 [Nelumbo nucifera]	CP019100.1	CP019100	349	0	Spirodela polyrhiza strain 9509 chromosome 8 sequence	--	--	--	--	O48716	1339	2.6e-146	Protein JINGUBANG OS=Arabidopsis thaliana OX=3702 GN=JGB PE=1 SV=1	PF00400	WD domain, G-beta repeat	--	--	GO:0005515	protein binding	--	--	--	--
Cluster-3890.16359	0.245707	2.72278	-3.42913	6.09357e-06	0.000679864	330	--	--	--	--	--	--	--	--	--	--	--	--	--	--	--	--	--	--	PF00002	7 transmembrane receptor (Secretin family)	GO:0007186	G protein-coupled receptor signaling pathway	GO:0004930	G protein-coupled receptor activity	GO:0016021	integral component of membrane	--	--
Cluster-3890.1492	1.04426	6.07877	-2.53242	6.31866e-06	0.000698166	1236	1141998138	ONK78954.1	815	2.8e-84	uncharacterized protein A4U43_C01F1380 [Asparagus officinalis]	XM_028241202.1	XM_028241202	33	7.81541e-06	PREDICTED: Camellia sinensis probable cysteine protease RD21B (LOC114296876), mRNA	--	--	--	--	P25776	798	1e-83	Oryzain alpha chain OS=Oryza sativa subsp. japonica OX=39947 GN=Os04g0650000 PE=1 SV=2	PF00112//PF03051	Papain family cysteine protease//Peptidase C1-like family	GO:0006508	proteolysis	GO:0004197//GO:0008234	cysteine-type endopeptidase activity//cysteine-type peptidase activity	--	--	--	--
Cluster-3890.8762	13.7228	3.04825	2.16765	6.29803e-06	0.000698166	974	1562639352	RXH79777.1	200	4.5e-13	hypothetical protein DVH24_040924 [Malus domestica]	CP027623.1	CP027623	74	9.87419e-29	Linum usitatissimum chromosome Lu13	K14272	GGAT	glutamate--glyoxylate aminotransferase	http://www.genome.jp/dbget-bin/www_bget?ko:K14272	Q9S7E9	187	5.6e-13	Glutamate--glyoxylate aminotransferase 2 OS=Arabidopsis thaliana OX=3702 GN=GGAT2 PE=1 SV=1	--	--	--	--	--	--	--	--	--	--
Cluster-3890.13500	8.96832	36.0927	-2.00786	6.40711e-06	0.000704536	1027	1179566134	XP_020703158.1	253	3.4e-19	uncharacterized protein LOC110114576 [Dendrobium catenatum]	--	--	--	--	--	--	--	--	--	--	--	--	--	--	--	--	--	--	--	--	--	--	--
Cluster-3890.16689	0.307134	2.97606	-3.24408	6.74687e-06	0.000738347	592	197307002	ACH59852.1	188	6.8e-12	late embryo abundance protein, partial [Pseudotsuga menziesii]	--	--	--	--	--	--	--	--	--	Q8SVY9	138	1.6e-07	Uncharacterized protein ECU03_1610 OS=Encephalitozoon cuniculi (strain GB-M1) OX=284813 GN=ECU03_1610 PE=1 SV=1	PF01442//PF04684//PF07464	Apolipoprotein A1/A4/E domain//BAF1 / ABF1 chromatin reorganising factor//Apolipophorin-III precursor (apoLp-III)	GO:0042157//GO:0006869//GO:0006338	lipoprotein metabolic process//lipid transport//chromatin remodeling	GO:0008289//GO:0003677	lipid binding//DNA binding	GO:0005576//GO:0005634	extracellular region//nucleus	--	--
Cluster-3890.6332	23.7531	5.7628	2.0418	6.8152e-06	0.000742273	949	672162588	XP_008801112.1	292	9.5e-24	protein LURP-one-related 11-like [Phoenix dactylifera]	--	--	--	--	--	--	--	--	--	Q9LUM1	212	6.8e-16	Protein LURP-one-related 11 OS=Arabidopsis thaliana OX=3702 GN=At3g14260 PE=2 SV=1	--	--	--	--	--	--	--	--	--	--
Cluster-3890.8735	8.59976	34.5097	-2.00365	7.00234e-06	0.000759041	2859	1387778195	PWA49988.1	315	6.2e-26	cysteine oxygenase/2-aminoethanethiol dioxygenase, RmlC-like jelly roll fold protein [Artemisia annua]	--	--	--	--	--	K10712	ADO	cysteamine dioxygenase	http://www.genome.jp/dbget-bin/www_bget?ko:K10712	Q8LGJ5	217	5.4e-16	Plant cysteine oxidase 2 OS=Arabidopsis thaliana OX=3702 GN=PCO2 PE=1 SV=1	PF07847//PF03824	PCO_ADO//High-affinity nickel-transport protein	GO:0015675//GO:0055114//GO:0035444	nickel cation transport//oxidation-reduction process//nickel cation transmembrane transport	GO:0015099//GO:0016702	nickel cation transmembrane transporter activity//oxidoreductase activity, acting on single donors with incorporation of molecular oxygen, incorporation of two atoms of oxygen	GO:0005887	integral component of plasma membrane	--	--
Cluster-3890.12230	78.4021	293.704	-1.90529	7.72873e-06	0.000831327	1753	1045861112	ANV22064.1	1190	1.3e-127	cinnamate-4-hydroxylase [Anthurium andraeanum]	CP019097.1	CP019097	418	0	Spirodela polyrhiza strain 9509 chromosome 5 sequence	K00487	CYP73A	trans-cinnamate 4-monooxygenase	http://www.genome.jp/dbget-bin/www_bget?ko:K00487	Q96423	1156	4.3e-125	Trans-cinnamate 4-monooxygenase OS=Glycyrrhiza echinata OX=46348 GN=CYP73A14 PE=2 SV=1	PF00067	Cytochrome P450	GO:0055114	oxidation-reduction process	GO:0005506//GO:0020037//GO:0016705	iron ion binding//heme binding//oxidoreductase activity, acting on paired donors, with incorporation or reduction of molecular oxygen	--	--	--	--
Cluster-3890.585	5.459	22.3984	-2.03513	7.74189e-06	0.000831327	865	672173555	XP_008806913.1	264	1.5e-20	ethylene-responsive transcription factor ERF096-like [Phoenix dactylifera]	CP019110.1	CP019110	79	1.45061e-31	Spirodela polyrhiza strain 9509 chromosome 18 sequence	--	--	--	--	A0A3Q7I5Y9	226	1.5e-17	Ethylene-response factor C3 OS=Solanum lycopersicum OX=4081 GN=ERF.C.3 PE=2 SV=1	PF00847	AP2 domain	GO:0006355	regulation of transcription, DNA-templated	GO:0003700	DNA-binding transcription factor activity	GO:0005667	transcription regulator complex	--	--
Cluster-3890.12964	1.41282	0	7.50976	8.28134e-06	0.000885098	608	--	--	--	--	--	--	--	--	--	--	--	--	--	--	--	--	--	--	--	--	--	--	--	--	--	--	--	--
Cluster-3890.13290	24.755	93.7143	-1.92021	8.59742e-06	0.000914606	1289	1216251216	XP_021609389.1	1752	6.5e-193	chalcone synthase 2 [Manihot esculenta]	AJ297791.2	AJ297791	467	0	Ruta graveolens mRNA for putative chalcone synthase (chs3 gene)	K00660	CHS	chalcone synthase	http://www.genome.jp/dbget-bin/www_bget?ko:K00660	P06515	1737	1.4e-192	Chalcone synthase OS=Antirrhinum majus OX=4151 GN=CHS PE=3 SV=1	PF02344//PF08545//PF08392	Myc leucine zipper domain//3-Oxoacyl-[acyl-carrier-protein (ACP)] synthase III//FAE1/Type III polyketide synthase-like protein	GO:0006633//GO:0042967//GO:0006355	fatty acid biosynthetic process//obsolete acyl-carrier-protein biosynthetic process//regulation of transcription, DNA-templated	GO:0004315//GO:0003700//GO:0016747	3-oxoacyl-[acyl-carrier-protein] synthase activity//DNA-binding transcription factor activity//transferase activity, transferring acyl groups other than amino-acyl groups	GO:0016020//GO:0005667//GO:0005835//GO:0042025	membrane//transcription regulator complex//fatty acid synthase complex//host cell nucleus	--	--
Cluster-3890.11099	20.3323	4.939	2.03976	8.87781e-06	0.000940062	745	--	--	--	--	--	--	--	--	--	--	--	--	--	--	--	--	--	--	--	--	--	--	--	--	--	--	--	--
Cluster-3890.13867	2.38029	10.7797	-2.17543	9.42308e-06	0.000990707	625	56783926	BAD81363.1	195	1.1e-12	unknown protein [Oryza sativa Japonica Group]	CP019101.1	CP019101	58	4.88055e-20	Spirodela polyrhiza strain 9509 chromosome 9 sequence	--	--	--	--	--	--	--	--	--	--	--	--	--	--	--	--	--	--
Cluster-3890.2255	14.7424	3.41931	2.10568	9.44273e-06	0.000990707	1097	--	--	--	--	--	--	--	--	--	--	--	--	--	--	--	--	--	--	--	--	--	--	--	--	--	--	--	--
Cluster-3890.16238	15.1724	57.8116	-1.92936	9.5504e-06	0.000997428	1865	381356180	AFG26323.1	2118	3.4e-235	4-coumarate-CoA ligase [Cinnamomum osmophloeum]	XM_002444062.2	XM_002444062	258	9.96351e-131	PREDICTED: Sorghum bicolor probable 4-coumarate--CoA ligase 1 (LOC8082428), mRNA	K01904	4CL	4-coumarate--CoA ligase	http://www.genome.jp/dbget-bin/www_bget?ko:K01904	O24540	2028	3.6e-226	4-coumarate--CoA ligase OS=Vanilla planifolia OX=51239 GN=4CL PE=3 SV=1	PF00501	AMP-binding enzyme	--	--	GO:0003824	catalytic activity	--	--	--	--
Cluster-3890.14490	1.96566	9.11815	-2.20925	1.02549e-05	0.00106613	986	1228890846	XP_021999125.1	574	2e-56	protein RICE SALT SENSITIVE 3-like [Helianthus annuus]	--	--	--	--	--	--	--	--	--	K4PW38	222	4.9e-17	Protein RICE SALT SENSITIVE 3 OS=Oryza sativa subsp. japonica OX=39947 GN=RSS3 PE=1 SV=1	--	--	--	--	--	--	--	--	--	--
Cluster-3890.12831	3.86989	16.21	-2.06431	1.04518e-05	0.00108169	1861	1002852707	XP_015691901.1	219	5.5e-15	PREDICTED: protein POLYCHOME-like [Oryza brachyantha]	--	--	--	--	--	--	--	--	--	Q9M2R1	140	3e-07	Protein GIGAS CELL1 OS=Arabidopsis thaliana OX=3702 GN=GIG1 PE=1 SV=1	--	--	--	--	--	--	--	--	--	--
Cluster-3890.9094	554.812	151.779	1.86997	1.06351e-05	0.0010957	859	743763747	XP_010912071.1	282	1.2e-22	nuclear speckle RNA-binding protein B isoform X1 [Elaeis guineensis]	--	--	--	--	--	K20725	MKS1	MAP kinase substrate 1	http://www.genome.jp/dbget-bin/www_bget?ko:K20725	Q8LGD5	176	9.3e-12	Protein MKS1 OS=Arabidopsis thaliana OX=3702 GN=MKS1 PE=1 SV=2	--	--	--	--	--	--	--	--	--	--
Cluster-3890.7151	151.386	40.9683	1.88545	1.07482e-05	0.00110238	783	1532923014	RRT80561.1	160	1.6e-08	hypothetical protein B296_00023559 [Ensete ventricosum]	--	--	--	--	--	--	--	--	--	--	--	--	--	--	--	--	--	--	--	--	--	--	--
Cluster-2814.0	2.88706	0.316602	3.15766	1.11765e-05	0.0011412	759	--	--	--	--	--	--	--	--	--	--	--	--	--	--	--	--	--	--	--	--	--	--	--	--	--	--	--	--
Cluster-3890.8032	114.883	31.0232	1.88848	1.12814e-05	0.00114679	3021	37183394	AAQ89590.1	700	1.5e-70	mono- or diacylglycerol acyltransferase [Spirodela polyrhiza]	--	--	--	--	--	K14457	MOGAT2, MGAT2	2-acylglycerol O-acyltransferase 2	http://www.genome.jp/dbget-bin/www_bget?ko:K14457	Q9ASU1	372	6.1e-34	Diacylglycerol O-acyltransferase 2 OS=Arabidopsis thaliana OX=3702 GN=DGAT2 PE=1 SV=1	PF03982	Diacylglycerol acyltransferase	--	--	GO:0016747	transferase activity, transferring acyl groups other than amino-acyl groups	--	--	--	--
Cluster-3890.8408	17.6295	66.085	-1.90586	1.15449e-05	0.00116838	336	1344034814	XP_023900612.1	238	6.2e-18	probable aquaporin NIP5-1 [Quercus suber]	--	--	--	--	--	--	--	--	--	Q9ATN1	211	3.2e-16	Aquaporin NIP3-1 OS=Zea mays OX=4577 GN=NIP3-1 PE=2 SV=1	--	--	--	--	--	--	--	--	--	--
Cluster-3890.11008	26.3521	6.71197	1.97186	1.25257e-05	0.00126206	571	--	--	--	--	--	--	--	--	--	--	--	--	--	--	--	--	--	--	--	--	--	--	--	--	--	--	--	--
Cluster-3890.16496	4.60701	18.7429	-2.0226	1.26008e-05	0.00126406	453	--	--	--	--	--	--	--	--	--	--	--	--	--	--	--	--	--	--	PF07174	Fibronectin-attachment protein (FAP)	--	--	GO:0050840	extracellular matrix binding	GO:0005576	extracellular region	--	--
Cluster-2.0	0	1.39305	-7.48955	1.26863e-05	0.00126708	596	--	--	--	--	--	--	--	--	--	--	--	--	--	--	--	--	--	--	PF13885	Keratin, high sulfur B2 protein	--	--	--	--	GO:0045095	keratin filament	--	--
Cluster-3890.15743	2.27279	10.068	-2.14341	1.38199e-05	0.0013743	374	--	--	--	--	--	--	--	--	--	--	--	--	--	--	--	--	--	--	--	--	--	--	--	--	--	--	--	--
Cluster-3890.2048	15.4181	3.73591	2.04282	1.43605e-05	0.00142072	438	1577019791	RZS17479.1	157	2e-08	hypothetical protein BHM03_00049623 [Ensete ventricosum]	--	--	--	--	--	--	--	--	--	--	--	--	--	--	--	--	--	--	--	--	--	--	--
Cluster-3890.4883	3.56276	0.506564	2.7953	1.44109e-05	0.00142072	814	1098818590	XP_018815469.1	269	3.8e-21	PREDICTED: uncharacterized protein LOC108987073 [Juglans regia]	--	--	--	--	--	--	--	--	--	--	--	--	--	PF00499	NADH-ubiquinone/plastoquinone oxidoreductase chain 6	GO:0006120//GO:0055114//GO:0006814//GO:0006744	mitochondrial electron transport, NADH to ubiquinone//oxidation-reduction process//sodium ion transport//ubiquinone biosynthetic process	GO:0008137	NADH dehydrogenase (ubiquinone) activity	--	--	--	--
Cluster-3890.12715	14.9267	3.60927	2.04576	1.50574e-05	0.0014655	2517	1343976266	XP_023872363.1	684	8.9e-69	LRR receptor-like serine/threonine-protein kinase IOS1 [Quercus suber]	--	--	--	--	--	--	--	--	--	O64483	568	9.5e-57	Senescence-induced receptor-like serine/threonine-protein kinase OS=Arabidopsis thaliana OX=3702 GN=SIRK PE=1 SV=1	PF00946//PF13855	Mononegavirales RNA dependent RNA polymerase//Leucine rich repeat	GO:0006144//GO:0006370//GO:0009451	purine nucleobase metabolic process//7-methylguanosine mRNA capping//RNA modification	GO:0005524//GO:0003968//GO:0004482//GO:0005515	ATP binding//RNA-directed 5'-3' RNA polymerase activity//mRNA (guanine-N7-)-methyltransferase activity//protein binding	GO:0031379	RNA-directed RNA polymerase complex	--	--
Cluster-3890.13632	20.7008	5.2556	1.97617	1.50181e-05	0.0014655	520	--	--	--	--	--	--	--	--	--	--	--	--	--	--	--	--	--	--	--	--	--	--	--	--	--	--	--	--
Cluster-3890.3153	32.0648	116.193	-1.85721	1.50301e-05	0.0014655	2130	1293583103	PKA52383.1	1569	1.8e-171	putative galacturonosyltransferase 12 [Apostasia shenzhenica]	XM_027314802.1	XM_027314802	112	1.65222e-49	PREDICTED: Coffea eugenioides probable galacturonosyltransferase 12 (LOC113770370), transcript variant X1, mRNA	K20867	GAUT12S	galacturonosyltransferase 12/13/14/15	http://www.genome.jp/dbget-bin/www_bget?ko:K20867	Q9FH36	1405	7.1e-154	Probable galacturonosyltransferase 12 OS=Arabidopsis thaliana OX=3702 GN=GAUT12 PE=2 SV=1	PF01501//PF11807//PF09810	Glycosyl transferase family 8//Mycotoxin biosynthesis protein UstYa//Exonuclease V - a 5' deoxyribonuclease	GO:0043386//GO:0006308	mycotoxin biosynthetic process//DNA catabolic process	GO:0045145//GO:0016757	single-stranded DNA 5'-3' exodeoxyribonuclease activity//transferase activity, transferring glycosyl groups	--	--	--	--
Cluster-3890.1429	3.01237	12.6622	-2.06872	1.52147e-05	0.00147454	777	--	--	--	--	--	--	--	--	--	--	--	--	--	--	--	--	--	--	PF05887	Procyclic acidic repetitive protein (PARP)	--	--	--	--	GO:0016020	membrane	--	--
Cluster-3890.13437	80.3414	22.0355	1.86594	1.53743e-05	0.00147905	1049	695038685	XP_009406860.1	511	4.2e-49	PREDICTED: protein LURP-one-related 8-like [Musa acuminata subsp. malaccensis]	--	--	--	--	--	--	--	--	--	Q9ZVI6	353	3.4e-32	Protein LURP-one-related 8 OS=Arabidopsis thaliana OX=3702 GN=At2g38640 PE=2 SV=1	--	--	--	--	--	--	--	--	--	--
Cluster-3890.16306	19.2266	70.349	-1.871	1.53906e-05	0.00147905	923	1235069856	ASU87417.1	522	2e-50	chalcone isomerase [Camellia sinensis]	CP027626.1	CP027626	86	1.99314e-35	Linum usitatissimum chromosome Lu2	--	--	--	--	Q8VZW3	420	5.1e-40	Probable chalcone--flavonone isomerase 3 OS=Arabidopsis thaliana OX=3702 GN=CHI3 PE=1 SV=1	PF16035//PF02431	Chalcone isomerase like//Chalcone-flavanone isomerase	--	--	GO:0016872	intramolecular lyase activity	--	--	--	--
Cluster-3890.13793	9.70544	2.1529	2.16846	1.55601e-05	0.00148909	838	1532916559	RRT75463.1	222	1.1e-15	hypothetical protein B296_00006627 [Ensete ventricosum]	--	--	--	--	--	K09286	EREBP	EREBP-like factor	http://www.genome.jp/dbget-bin/www_bget?ko:K09286	Q9LM15	204	5.1e-15	Ethylene-responsive transcription factor RAP2-13 OS=Arabidopsis thaliana OX=3702 GN=RAP2-13 PE=1 SV=1	PF00847	AP2 domain	GO:0006355	regulation of transcription, DNA-templated	GO:0003700	DNA-binding transcription factor activity	GO:0005667	transcription regulator complex	--	--
Cluster-3890.10275	433.428	121.829	1.83087	1.60082e-05	0.00152219	1639	901795026	KMZ58100.1	729	3.5e-74	hypothetical protein ZOSMA_7G01310 [Zostera marina]	--	--	--	--	--	--	--	--	--	--	--	--	--	PF04004//PF08718	Leo1-like protein//Glycolipid transfer protein (GLTP)	GO:0120009//GO:0006368//GO:0016570	intermembrane lipid transfer//transcription elongation from RNA polymerase II promoter//histone modification	GO:0120013	lipid transfer activity	GO:0016593//GO:0005737	Cdc73/Paf1 complex//cytoplasm	--	--
Cluster-3890.13831	27.2735	7.09189	1.94209	1.60391e-05	0.00152219	828	573961585	XP_006662953.1	169	1.5e-09	PREDICTED: uncharacterized protein LOC102719904 [Oryza brachyantha]	--	--	--	--	--	--	--	--	--	--	--	--	--	--	--	--	--	--	--	--	--	--	--
Cluster-3890.13670	8.76192	1.89961	2.20092	1.64334e-05	0.00154676	1857	--	--	--	--	--	--	--	--	--	--	--	--	--	--	--	--	--	--	--	--	--	--	--	--	--	--	--	--
Cluster-3890.6821	569.156	2014.7	-1.82365	1.64228e-05	0.00154676	917	659081813	XP_008441527.1	1118	1.5e-119	PREDICTED: chlorophyll a-b binding protein CP24 10A, chloroplastic [Cucumis melo]	XM_002447267.2	XM_002447267	283	6.09402e-145	PREDICTED: Sorghum bicolor chlorophyll a-b binding protein CP24 10B, chloroplastic (LOC8085855), mRNA	K08917	LHCB6	light-harvesting complex II chlorophyll a/b binding protein 6	http://www.genome.jp/dbget-bin/www_bget?ko:K08917	P27524	1096	2.1e-118	Chlorophyll a-b binding protein CP24 10A, chloroplastic OS=Solanum lycopersicum OX=4081 GN=CAP10A PE=3 SV=1	PF02632	BioY family	GO:0015878	biotin transport	GO:0015225	biotin transmembrane transporter activity	GO:0005886	plasma membrane	--	--
Cluster-3890.8901	366.964	103.397	1.82737	1.67595e-05	0.001571	1367	1035951954	OAY74539.1	752	6.3e-77	PGR5-like protein 1A, chloroplastic [Ananas comosus]	--	--	--	--	--	--	--	--	--	Q8GYC7	181	3.9e-12	PGR5-like protein 1B, chloroplastic OS=Arabidopsis thaliana OX=3702 GN=PGRL1B PE=1 SV=1	PF01599//PF00424	Ribosomal protein S27a//REV protein (anti-repression trans-activator protein)	GO:0006412//GO:0042254//GO:0006355	translation//ribosome biogenesis//regulation of transcription, DNA-templated	GO:0003735//GO:0003700	structural constituent of ribosome//DNA-binding transcription factor activity	GO:0005840//GO:0005667//GO:0042025	ribosome//transcription regulator complex//host cell nucleus	--	--
Cluster-3890.8361	774.966	219.215	1.82175	1.70898e-05	0.00159542	1633	720069697	XP_010277507.1	380	1e-33	PREDICTED: uncharacterized protein LOC104611921 [Nelumbo nucifera]	--	--	--	--	--	--	--	--	--	--	--	--	--	--	--	--	--	--	--	--	--	--	--
Cluster-1738.0	3.74704	0.569884	2.70041	1.72465e-05	0.0016035	1116	1365954960	XP_024177500.1	888	8.7e-93	LOW QUALITY PROTEIN: probable LRR receptor-like serine/threonine-protein kinase At4g29180 [Rosa chinensis]	XM_024066044.1	XM_024066044	40	9.03724e-10	PREDICTED: Quercus suber LRR receptor-like serine/threonine-protein kinase IOS1 (LOC112033270), partial mRNA	--	--	--	--	Q9FZB1	820	2.5e-86	Probable LRR receptor-like serine/threonine-protein kinase At1g51880 OS=Arabidopsis thaliana OX=3702 GN=At1g51880 PE=2 SV=1	PF00069//PF07714	Protein kinase domain//Protein tyrosine and serine/threonine kinase	GO:0006468	protein phosphorylation	GO:0005524//GO:0004672	ATP binding//protein kinase activity	--	--	--	--
Cluster-3890.6331	51.23	13.9938	1.87161	1.75181e-05	0.00162216	373	1179519628	XP_020681609.1	294	2.2e-24	uncharacterized protein LOC110098973 [Dendrobium catenatum]	--	--	--	--	--	--	--	--	--	--	--	--	--	PF09297	NADH pyrophosphatase zinc ribbon domain	--	--	GO:0016787//GO:0046872	hydrolase activity//metal ion binding	--	--	--	--
Cluster-3890.430	1.8428	8.29498	-2.1656	1.77955e-05	0.0016412	672	1338419495	PON42964.1	364	3e-32	hypothetical protein TorRG33x02_334730 [Trema orientale]	--	--	--	--	--	--	--	--	--	--	--	--	--	--	--	--	--	--	--	--	--	--	--
Cluster-3890.14860	0.368561	2.97606	-2.98701	1.86467e-05	0.00170022	1072	1344034627	XP_023900520.1	1246	2.6e-134	subtilisin-like protease SBT1.2 [Quercus suber]	--	--	--	--	--	--	--	--	--	O64495	1110	5.7e-120	Subtilisin-like protease SBT1.2 OS=Arabidopsis thaliana OX=3702 GN=SBT1.2 PE=2 SV=1	PF00082	Subtilase family	GO:0006508	proteolysis	GO:0004252	serine-type endopeptidase activity	--	--	--	--
Cluster-3890.483	3.00991	12.4741	-2.04832	1.86584e-05	0.00170022	614	--	--	--	--	--	--	--	--	--	--	--	--	--	--	--	--	--	--	--	--	--	--	--	--	--	--	--	--
Cluster-3890.6536	39.2517	10.5745	1.89139	1.86285e-05	0.00170022	1381	743765430	XP_010912937.1	624	4.4e-62	protein-L-isoaspartate O-methyltransferase isoform X1 [Elaeis guineensis]	--	--	--	--	--	K00573	E2.1.1.77, pcm	protein-L-isoaspartate(D-aspartate) O-methyltransferase	http://www.genome.jp/dbget-bin/www_bget?ko:K00573	Q43209	553	2.9e-55	Protein-L-isoaspartate O-methyltransferase OS=Triticum aestivum OX=4565 GN=PCM PE=1 SV=1	PF05175//PF08241	Methyltransferase small domain//Methyltransferase domain	--	--	GO:0008168	methyltransferase activity	--	--	KOG1661	Protein-L-isoaspartate(D-aspartate) O-methyltransferase
Cluster-3890.11123	3.4399	13.9938	-2.02189	1.95135e-05	0.00176322	1098	1201303724	OVA05491.1	271	3e-21	hypothetical protein BVC80_441g267 [Macleaya cordata]	--	--	--	--	--	K18636	TAN1	microtubule-binding protein TANGLED1	http://www.genome.jp/dbget-bin/www_bget?ko:K18636	Q9FUH9	256	6.3e-21	Microtubule-binding protein TANGLED1 OS=Zea mays OX=4577 GN=TAN1 PE=2 SV=1	PF00906	Hepatitis core antigen	GO:0009405	pathogenesis	GO:0005198	structural molecule activity	--	--	--	--
Cluster-3890.15323	1.28996	0	7.37927	1.95811e-05	0.00176322	592	672129926	XP_008788483.1	143	1.1e-06	sigma factor binding protein 2, chloroplastic-like [Phoenix dactylifera]	--	--	--	--	--	--	--	--	--	--	--	--	--	--	--	--	--	--	--	--	--	--	--
Cluster-3890.17024	0	1.32973	-7.42282	1.95811e-05	0.00176322	637	695027562	XP_009401130.1	223	6.4e-16	PREDICTED: late embryogenesis abundant protein Dc3 [Musa acuminata subsp. malaccensis]	--	--	--	--	--	--	--	--	--	P83442	155	1.9e-09	Late embryogenesis abundant protein Dc3 OS=Daucus carota OX=4039 PE=2 SV=1	PF02932//PF05957//PF01442	Neurotransmitter-gated ion-channel transmembrane region//DUF883 N-terminal domain//Apolipoprotein A1/A4/E domain	GO:0006811//GO:0042157//GO:0006869	ion transport//lipoprotein metabolic process//lipid transport	GO:0043022//GO:0008289	ribosome binding//lipid binding	GO:0005576//GO:0016021	extracellular region//integral component of membrane	--	--
Cluster-3890.8706	14.7424	53.4425	-1.85746	1.97625e-05	0.00177258	3718	672203458	XP_008778650.1	481	4.5e-45	ABSCISIC ACID-INSENSITIVE 5-like protein 7 [Phoenix dactylifera]	EU976866.1	EU976866	73	1.38902e-27	Zea mays clone 992259 ABA response element binding factor mRNA, complete cds	K14432	ABF	ABA responsive element binding factor	http://www.genome.jp/dbget-bin/www_bget?ko:K14432	Q8RZ35	381	6.8e-35	bZIP transcription factor ABI5 homolog OS=Oryza sativa subsp. japonica OX=39947 GN=ABI5 PE=1 SV=1	PF00170//PF07716//PF04177//PF03131	bZIP transcription factor//Basic region leucine zipper//TAP42-like family//bZIP Maf transcription factor	GO:0006355//GO:0009966	regulation of transcription, DNA-templated//regulation of signal transduction	GO:0003700//GO:0003677	DNA-binding transcription factor activity//DNA binding	GO:0005634//GO:0005667	nucleus//transcription regulator complex	--	--
Cluster-3890.10457	272.002	950.48	-1.80501	2.00744e-05	0.00179352	1414	1229773448	XP_022139718.1	1416	6.6e-154	protochlorophyllide reductase, chloroplastic [Momordica charantia]	CP019095.1	CP019095	528	0	Spirodela polyrhiza strain 9509 chromosome 3 sequence	K00218	por	protochlorophyllide reductase	http://www.genome.jp/dbget-bin/www_bget?ko:K00218	Q41249	1378	6.4e-151	Protochlorophyllide reductase, chloroplastic OS=Cucumis sativus OX=3659 GN=PORA PE=2 SV=1	PF12242	NAD(P)H binding domain of trans-2-enoyl-CoA reductase	GO:0055114	oxidation-reduction process	GO:0016491	oxidoreductase activity	--	--	KOG1208	Dehydrogenases with different specificities (related to short-chain alcohol dehydrogenases)
Cluster-3890.16352	4.66844	18.2996	-1.96901	2.07233e-05	0.0018443	447	1338461177	PON83325.1	214	4.9e-15	Proteinase inhibitor [Trema orientale]	--	--	--	--	--	--	--	--	--	P24076	186	3.3e-13	Glu S.griseus protease inhibitor OS=Momordica charantia OX=3673 PE=1 SV=1	PF00280	Potato inhibitor I family	GO:0009611	response to wounding	GO:0004867	serine-type endopeptidase inhibitor activity	--	--	--	--
Cluster-3890.14654	5.71269	1.13977	2.31756	2.12271e-05	0.00188012	620	--	--	--	--	--	--	--	--	--	--	--	--	--	--	--	--	--	--	--	--	--	--	--	--	--	--	--	--
Cluster-3890.740	6.44982	24.3151	-1.91324	2.12903e-05	0.00188012	998	1035945225	OAY69955.1	569	7.6e-56	hypothetical protein ACMD2_07692 [Ananas comosus]	XM_008808536.3	XM_008808536	70	1.69444e-26	PREDICTED: Phoenix dactylifera uncharacterized LOC103719337 (LOC103719337), mRNA	--	--	--	--	--	--	--	--	PF00854	POT family	GO:0055085	transmembrane transport	GO:0022857	transmembrane transporter activity	GO:0016020	membrane	--	--
Cluster-3890.725	1.65852	7.7251	-2.21434	2.15696e-05	0.00189746	1083	1585730696	XP_028061424.1	909	3.1e-95	peroxidase 3-like [Camellia sinensis]	CP019094.1	CP019094	141	6.26623e-66	Spirodela polyrhiza strain 9509 chromosome 2 sequence	K00430	E1.11.1.7	peroxidase	http://www.genome.jp/dbget-bin/www_bget?ko:K00430	Q9LXG3	701	1.5e-72	Peroxidase 56 OS=Arabidopsis thaliana OX=3702 GN=PER56 PE=2 SV=1	PF00141//PF01300	Peroxidase//Telomere recombination	GO:0055114//GO:0006979//GO:0006804	oxidation-reduction process//response to oxidative stress//obsolete peroxidase reaction	GO:0003725//GO:0020037//GO:0004601	double-stranded RNA binding//heme binding//peroxidase activity	--	--	--	--
Cluster-3890.3553	55.7399	15.5135	1.84466	2.25745e-05	0.00197826	1469	720035592	XP_010267091.1	520	5.4e-50	PREDICTED: probable inositol oxygenase [Nelumbo nucifera]	XM_011079920.2	XM_011079920	75	4.18957e-29	PREDICTED: Sesamum indicum inositol oxygenase 1-like (LOC105162022), mRNA	K00469	MIOX	inositol oxygenase	http://www.genome.jp/dbget-bin/www_bget?ko:K00469	Q8L799	494	2.1e-48	Inositol oxygenase 1 OS=Arabidopsis thaliana OX=3702 GN=MIOX1 PE=2 SV=1	PF05153	Myo-inositol oxygenase	GO:0019310//GO:0055114	inositol catabolic process//oxidation-reduction process	GO:0050113//GO:0005506	inositol oxygenase activity//iron ion binding	GO:0005737	cytoplasm	KOG1573	Aldehyde reductase
Cluster-3611.0	1.16711	5.95212	-2.34275	2.30038e-05	0.00199296	2084	1012349725	KYP60915.1	1327	2e-143	Auxin efflux carrier component 3 [Cajanus cajan]	KJ664453.1	KJ664453	71	1.00047e-26	Podocarpus rubens isolate PrPINI PIN-like protein mRNA, partial cds	K13947	PIN	auxin efflux carrier family	http://www.genome.jp/dbget-bin/www_bget?ko:K13947	Q0IQA5	1244	3.2e-135	Probable auxin efflux carrier component 1d OS=Oryza sativa subsp. japonica OX=39947 GN=PIN1D PE=2 SV=2	PF03547	Membrane transport protein	GO:0055085	transmembrane transport	--	--	GO:0016021	integral component of membrane	--	--
Cluster-3890.158	0.0614268	1.64633	-4.5787	2.29623e-05	0.00199296	878	743832753	XP_010935066.1	702	2.5e-71	sulfite exporter TauE/SafE family protein 3 [Elaeis guineensis]	--	--	--	--	--	--	--	--	--	Q8L7A0	553	1.8e-55	Sulfite exporter TauE/SafE family protein 3 OS=Arabidopsis thaliana OX=3702 GN=At2g25737 PE=2 SV=1	PF01925	Sulfite exporter TauE/SafE	--	--	--	--	GO:0016021	integral component of membrane	--	--
Cluster-567.0	0.0614268	1.64633	-4.5787	2.29623e-05	0.00199296	551	--	--	--	--	--	--	--	--	--	--	--	--	--	--	--	--	--	--	--	--	--	--	--	--	--	--	--	--
Cluster-3890.3675	20.578	72.9452	-1.82532	2.37892e-05	0.00205254	1681	743820880	XP_010931896.1	1594	1.8e-174	tryptophan decarboxylase 1-like [Elaeis guineensis]	XM_004972823.3	XM_004972823	134	7.64959e-62	PREDICTED: Setaria italica aromatic-L-amino-acid decarboxylase (LOC101764227), mRNA	K01592	E4.1.1.25	tyrosine decarboxylase	http://www.genome.jp/dbget-bin/www_bget?ko:K01592	P93083	1443	2.2e-158	Tryptophan decarboxylase TDC2 OS=Camptotheca acuminata OX=16922 GN=TDC2 PE=1 SV=1	PF00282	Pyridoxal-dependent decarboxylase conserved domain	GO:0019752	carboxylic acid metabolic process	GO:0030170//GO:0016831	pyridoxal phosphate binding//carboxy-lyase activity	--	--	KOG0628	Aromatic-L-amino-acid/L-histidine decarboxylase
Cluster-3890.8332	14.9267	53.3792	-1.83784	2.38709e-05	0.00205254	761	1228851488	XP_021982491.1	389	4.3e-35	heavy metal-associated isoprenylated plant protein 26-like [Helianthus annuus]	--	--	--	--	--	--	--	--	--	Q67ZW1	367	5.8e-34	Heavy metal-associated isoprenylated plant protein 27 OS=Arabidopsis thaliana OX=3702 GN=HIPP27 PE=1 SV=1	PF00403	Heavy-metal-associated domain	GO:0030001	metal ion transport	GO:0046872	metal ion binding	--	--	--	--
Cluster-3890.6125	9.3983	2.1529	2.1221	2.40751e-05	0.00206235	520	--	--	--	--	--	--	--	--	--	--	--	--	--	--	--	--	--	--	--	--	--	--	--	--	--	--	--	--
Cluster-3890.15835	0.614268	3.86255	-2.63733	2.44421e-05	0.00208597	1123	1347702114	PPS01150.1	743	5.7e-76	hypothetical protein GOBAR_AA19528 [Gossypium barbadense]	CP019106.1	CP019106	222	6.10368e-111	Spirodela polyrhiza strain 9509 chromosome 14 sequence	--	--	--	--	Q8VY76	621	3e-63	Basic leucine zipper 19 OS=Arabidopsis thaliana OX=3702 GN=BZIP19 PE=2 SV=1	PF07716//PF00272//PF00170	Basic region leucine zipper//Cecropin family//bZIP transcription factor	GO:0019731//GO:0006355	antibacterial humoral response//regulation of transcription, DNA-templated	GO:0003700	DNA-binding transcription factor activity	GO:0005576//GO:0005667	extracellular region//transcription regulator complex	--	--
Cluster-3890.6582	264.442	76.6811	1.78591	2.59615e-05	0.0022074	723	--	--	--	--	--	--	--	--	--	--	--	--	--	--	--	--	--	--	--	--	--	--	--	--	--	--	--	--
Cluster-3890.12960	41.8906	11.651	1.84548	2.63178e-05	0.00222941	2231	695029577	XP_009402217.1	342	3.6e-29	PREDICTED: protein LURP-one-related 15-like isoform X2 [Musa acuminata subsp. malaccensis]	--	--	--	--	--	--	--	--	--	Q9LZX1	282	1.2e-23	Protein LURP-one-related 15 OS=Arabidopsis thaliana OX=3702 GN=At5g01750 PE=1 SV=1	--	--	--	--	--	--	--	--	--	--
Cluster-3890.14980	5.52841	20.8958	-1.91678	2.74732e-05	0.0023187	1640	1559642662	RWW64740.1	422	1.4e-38	hypothetical protein BHE74_00028000 [Ensete ventricosum]	CP023113.2	CP023113	47	1.72077e-13	Lupinus angustifolius cultivar Tanjil chromosome LG-01	K10663	ATL4	E3 ubiquitin-protein ligase ATL4	http://www.genome.jp/dbget-bin/www_bget?ko:K10663	Q9LY41	258	5.5e-21	E3 ubiquitin-protein ligase ATL4 OS=Arabidopsis thaliana OX=3702 GN=ATL4 PE=1 SV=1	PF12861//PF12906//PF12678//PF15756//PF00097	Anaphase-promoting complex subunit 11 RING-H2 finger//RING-variant domain//RING-H2 zinc finger domain//Small Novel Rich in Cartilage//Zinc finger, C3HC4 type (RING finger)	GO:0016567//GO:0051216	protein ubiquitination//cartilage development	GO:0004842//GO:0008270//GO:0046872	ubiquitin-protein transferase activity//zinc ion binding//metal ion binding	GO:0005680	anaphase-promoting complex	--	--
Cluster-3890.10324	300.901	88.0395	1.77298	2.91455e-05	0.00245079	576	1175884444	XP_020595895.1	367	1.2e-32	uncharacterized protein LOC110035905 [Phalaenopsis equestris]	--	--	--	--	--	--	--	--	--	--	--	--	--	--	--	--	--	--	--	--	--	--	--
Cluster-27.0	0	1.26641	-7.35285	3.04594e-05	0.00253334	483	--	--	--	--	--	--	--	--	--	--	--	--	--	--	--	--	--	--	--	--	--	--	--	--	--	--	--	--
Cluster-3890.12301	26.8435	7.34518	1.86859	3.043e-05	0.00253334	1680	901807087	KMZ64205.1	470	3.9e-44	hypothetical protein ZOSMA_37G00850 [Zostera marina]	--	--	--	--	--	--	--	--	--	Q9SD53	176	1.8e-11	UPF0481 protein At3g47200 OS=Arabidopsis thaliana OX=3702 GN=At3g47200 PE=2 SV=1	--	--	--	--	--	--	--	--	--	--
Cluster-3890.47	0	1.26641	-7.35285	3.04594e-05	0.00253334	686	1557859366	RWR83932.1	725	4.2e-74	endoglucanase 12-like protein [Cinnamomum micranthum f. kanehirae]	--	--	--	--	--	--	--	--	--	Q38890	635	4.4e-65	Endoglucanase 25 OS=Arabidopsis thaliana OX=3702 GN=KOR PE=1 SV=1	PF00759	Glycosyl hydrolase family 9	GO:0005975	carbohydrate metabolic process	GO:0004553	hydrolase activity, hydrolyzing O-glycosyl compounds	--	--	--	--
Cluster-3890.11223	14.4353	3.73591	1.94784	3.38387e-05	0.0028042	717	1577016895	RZS14583.1	314	2e-26	hypothetical protein BHM03_00046287 [Ensete ventricosum]	--	--	--	--	--	--	--	--	--	Q9LQX2	261	1.1e-21	E3 ubiquitin-protein ligase MPSR1 OS=Arabidopsis thaliana OX=3702 GN=MPSR1 PE=1 SV=1	PF12678//PF12861//PF00097	RING-H2 zinc finger domain//Anaphase-promoting complex subunit 11 RING-H2 finger//Zinc finger, C3HC4 type (RING finger)	GO:0016567	protein ubiquitination	GO:0004842//GO:0046872//GO:0008270	ubiquitin-protein transferase activity//metal ion binding//zinc ion binding	GO:0005680	anaphase-promoting complex	--	--
Cluster-3890.8234	14.8039	51.4795	-1.79748	3.57294e-05	0.00295019	667	--	--	--	--	--	--	--	--	--	--	--	--	--	--	--	--	--	--	--	--	--	--	--	--	--	--	--	--
Cluster-1059.0	1.35139	6.39537	-2.23604	3.62035e-05	0.00295731	1179	1109218246	XP_019183599.1	707	8.9e-72	PREDICTED: zingipain-2-like [Ipomoea nil]	--	--	--	--	--	--	--	--	--	P25776	653	6.2e-67	Oryzain alpha chain OS=Oryza sativa subsp. japonica OX=39947 GN=Os04g0650000 PE=1 SV=2	PF03051//PF00112	Peptidase C1-like family//Papain family cysteine protease	GO:0006508	proteolysis	GO:0008234//GO:0004197	cysteine-type peptidase activity//cysteine-type endopeptidase activity	--	--	--	--
Cluster-3890.903	3.74704	0.633205	2.55035	3.61081e-05	0.00295731	1388	--	--	--	--	--	--	--	--	--	--	--	--	--	--	--	--	--	--	--	--	--	--	--	--	--	--	--	--
Cluster-3890.9807	10.6268	37.4496	-1.81648	3.60712e-05	0.00295731	1819	743870240	XP_010905995.1	1280	5e-138	glucan endo-1,3-beta-glucosidase 14 isoform X1 [Elaeis guineensis]	--	--	--	--	--	--	--	--	--	Q9ZQG9	1114	3.3e-120	Glucan endo-1,3-beta-glucosidase 14 OS=Arabidopsis thaliana OX=3702 GN=At2g27500 PE=2 SV=2	PF00332	Glycosyl hydrolases family 17	GO:0005975	carbohydrate metabolic process	GO:0004553	hydrolase activity, hydrolyzing O-glycosyl compounds	--	--	--	--
Cluster-3890.1569	5.34413	19.8193	-1.88934	3.65656e-05	0.00297625	2124	1147594853	XP_020101303.1	267	1.7e-20	chitinase-like protein PB1E7.04c isoform X2 [Ananas comosus]	--	--	--	--	--	--	--	--	--	--	--	--	--	--	--	--	--	--	--	--	--	--	--
Cluster-3890.13021	42.5074	143.927	-1.75937	3.67267e-05	0.00297877	767	1557857689	RWR82255.1	492	4.9e-47	dirigent protein 22-like protein [Cinnamomum micranthum f. kanehirae]	--	--	--	--	--	--	--	--	--	Q9SS03	448	2.4e-43	Dirigent protein 21 OS=Arabidopsis thaliana OX=3702 GN=DIR21 PE=3 SV=1	--	--	--	--	--	--	--	--	--	--
Cluster-3890.5161	105.777	31.1936	1.76145	3.88471e-05	0.00312942	509	--	--	--	--	--	--	--	--	--	--	--	--	--	--	--	--	--	--	--	--	--	--	--	--	--	--	--	--
Cluster-4087.0	0.368561	2.7861	-2.89211	3.88578e-05	0.00312942	621	672146093	XP_008796984.1	524	7.8e-51	thymocyte nuclear protein 1 [Phoenix dactylifera]	XM_010097430.2	XM_010097430	79	1.02729e-31	PREDICTED: Morus notabilis thymocyte nuclear protein 1 (LOC21386883), mRNA	--	--	--	--	Q90679	125	5.5e-06	Thymocyte nuclear protein 1 OS=Gallus gallus OX=9031 GN=THYN1 PE=1 SV=1	--	--	--	--	--	--	--	--	--	--
Cluster-3890.16581	1.5971	7.15521	-2.15809	3.92223e-05	0.00314769	1656	672164078	XP_008801904.1	1531	3.5e-167	probable monogalactosyldiacylglycerol synthase 3, chloroplastic [Phoenix dactylifera]	XM_020227433.1	XM_020227433	221	3.26559e-110	PREDICTED: Ananas comosus probable monogalactosyldiacylglycerol synthase 3, chloroplastic (LOC109706528), mRNA	K03715	E2.4.1.46	1,2-diacylglycerol 3-beta-galactosyltransferase	http://www.genome.jp/dbget-bin/www_bget?ko:K03715	Q0DWQ1	1453	1.5e-159	Probable monogalactosyldiacylglycerol synthase 3, chloroplastic OS=Oryza sativa subsp. japonica OX=39947 GN=MGD3 PE=3 SV=2	PF04101//PF02130//PF06925	Glycosyltransferase family 28 C-terminal domain//Uncharacterized protein family UPF0054//Monogalactosyldiacylglycerol (MGDG) synthase	GO:0006364//GO:0009247	rRNA processing//glycolipid biosynthetic process	GO:0016758//GO:0004222	transferase activity, transferring hexosyl groups//metalloendopeptidase activity	--	--	--	--
Cluster-3890.8626	221.302	737.367	-1.73633	3.97368e-05	0.00317783	2172	1150700433	XP_020261036.1	829	1.2e-85	binding partner of ACD11 1-like isoform X2 [Asparagus officinalis]	XM_028211728.1	XM_028211728	54	2.94244e-17	PREDICTED: Camellia sinensis binding partner of ACD11 1-like (LOC114270281), mRNA	--	--	--	--	Q9LFD5	579	4.4e-58	Binding partner of ACD11 1 OS=Arabidopsis thaliana OX=3702 GN=BPA1 PE=1 SV=1	PF00076//PF08777	RNA recognition motif. (a.k.a. RRM, RBD, or RNP domain)//RNA binding motif	--	--	GO:0003676//GO:0003723	nucleic acid binding//RNA binding	--	--	--	--
Cluster-3890.16974	0.122854	1.83629	-3.81914	4.06483e-05	0.00322816	458	--	--	--	--	--	--	--	--	--	--	--	--	--	--	--	--	--	--	--	--	--	--	--	--	--	--	--	--
Cluster-3890.8618	89.4989	26.4046	1.76078	4.06025e-05	0.00322816	973	1557860356	RWR84228.1	319	7.2e-27	protein MARD1 [Cinnamomum micranthum f. kanehirae]	--	--	--	--	--	--	--	--	--	Q8GYX2	165	2e-10	FCS-Like Zinc finger 14 OS=Arabidopsis thaliana OX=3702 GN=FLZ14 PE=1 SV=1	--	--	--	--	--	--	--	--	--	--
Cluster-3890.15971	10.934	38.1189	-1.80096	4.10422e-05	0.00324816	1856	1559638814	RWW60892.1	1727	7.5e-190	hypothetical protein BHE74_00032065 [Ensete ventricosum]	CP019093.1	CP019093	756	0	Spirodela polyrhiza strain 9509 chromosome 1 sequence	K02575	NRT, narK, nrtP, nasA	MFS transporter, NNP family, nitrate/nitrite transporter	http://www.genome.jp/dbget-bin/www_bget?ko:K02575	Q9LPV5	1661	1.3e-183	High affinity nitrate transporter 2.5 OS=Arabidopsis thaliana OX=3702 GN=NRT2.5 PE=1 SV=1	PF07690	Major Facilitator Superfamily	GO:0055085	transmembrane transport	GO:0022857	transmembrane transporter activity	--	--	--	--
Cluster-3890.8346	204.928	679.885	-1.73014	4.23047e-05	0.00333653	400	1271203792	PHU18993.1	477	1.4e-45	Chlorophyll a-b binding protein 3C, chloroplastic [Capsicum chinense]	XM_002455856.2	XM_002455856	198	4.52575e-98	PREDICTED: Sorghum bicolor chlorophyll a-b binding protein of LHCII type 1 (LOC8082496), mRNA	K08912	LHCB1	light-harvesting complex II chlorophyll a/b binding protein 1	http://www.genome.jp/dbget-bin/www_bget?ko:K08912	P12329	473	1.6e-46	Chlorophyll a-b binding protein 1, chloroplastic OS=Zea mays OX=4577 GN=CAB1 PE=1 SV=1	PF10143	2,3-bisphosphoglycerate-independent phosphoglycerate mutase	GO:0006007	glucose catabolic process	GO:0046537//GO:0003824	2,3-bisphosphoglycerate-independent phosphoglycerate mutase activity//catalytic activity	--	--	--	--
Cluster-3890.13411	21.438	5.8888	1.86274	4.30857e-05	0.00338645	957	1576986676	RZR84529.1	421	1.1e-38	hypothetical protein BHM03_00011385 [Ensete ventricosum]	--	--	--	--	--	K03676	grxC, GLRX, GLRX2	glutaredoxin 3	http://www.genome.jp/dbget-bin/www_bget?ko:K03676	Q0JG89	375	8.7e-35	Putative glutaredoxin-C2 OS=Oryza sativa subsp. japonica OX=39947 GN=GRXC2 PE=3 SV=2	PF00462	Glutaredoxin	GO:0006118//GO:0045454	obsolete electron transport//cell redox homeostasis	GO:0015035//GO:0009055	protein disulfide oxidoreductase activity//electron transfer activity	--	--	--	--
Cluster-3890.16885	3.07134	11.9042	-1.95182	4.37499e-05	0.00342688	1652	242040735	XP_002467762.1	1906	1.2e-210	phospho-2-dehydro-3-deoxyheptonate aldolase 1, chloroplastic [Sorghum bicolor]	XM_010535780.1	XM_010535780	170	7.30522e-82	PREDICTED: Tarenaya hassleriana phospho-2-dehydro-3-deoxyheptonate aldolase 1, chloroplastic-like (LOC104809720), mRNA	K01626	E2.5.1.54, aroF, aroG, aroH	3-deoxy-7-phosphoheptulonate synthase	http://www.genome.jp/dbget-bin/www_bget?ko:K01626	P37216	1874	2.3e-208	Phospho-2-dehydro-3-deoxyheptonate aldolase 2, chloroplastic OS=Solanum lycopersicum OX=4081 PE=2 SV=1	PF00262//PF01474	Calreticulin family//Class-II DAHP synthetase family	GO:0009073//GO:0006571//GO:0009094//GO:0006457//GO:0000162	aromatic amino acid family biosynthetic process//tyrosine biosynthetic process//L-phenylalanine biosynthetic process//protein folding//tryptophan biosynthetic process	GO:0051082//GO:0005509//GO:0003849	unfolded protein binding//calcium ion binding//3-deoxy-7-phosphoheptulonate synthase activity	GO:0005783	endoplasmic reticulum	--	--
Cluster-3890.5339	58.4783	17.1598	1.7684	4.40887e-05	0.00342992	1892	1585701257	XP_028124192.1	842	3.2e-87	protein DMR6-LIKE OXYGENASE 2-like [Camellia sinensis]	--	--	--	--	--	--	--	--	--	Q9ZSA8	524	9e-52	Protein DMR6-LIKE OXYGENASE 1 OS=Arabidopsis thaliana OX=3702 GN=DLO1 PE=1 SV=1	PF03171	2OG-Fe(II) oxygenase superfamily	GO:0055114	oxidation-reduction process	GO:0016491	oxidoreductase activity	--	--	--	--
Cluster-3890.6946	9.95115	34.6363	-1.79855	4.4055e-05	0.00342992	2857	1147573583	XP_020090467.1	2904	0	potassium channel KOR1-like isoform X2 [Ananas comosus]	CP019098.1	CP019098	149	6.01452e-70	Spirodela polyrhiza strain 9509 chromosome 6 sequence	--	--	--	--	Q653P0	2819	0	Potassium channel KOR1 OS=Oryza sativa subsp. japonica OX=39947 GN=Os06g0250600 PE=2 SV=1	PF00520//PF13606//PF00023	Ion transport protein//Ankyrin repeat//Ankyrin repeat	GO:0055085//GO:0006811	transmembrane transport//ion transport	GO:0005216//GO:0005515	ion channel activity//protein binding	GO:0016020	membrane	--	--
Cluster-3890.14152	38.576	129.047	-1.74192	4.44016e-05	0.00344255	581	1347686674	PPR88726.1	680	5.9e-69	hypothetical protein GOBAR_AA31967 [Gossypium barbadense]	CP019111.1	CP019111	251	2.32743e-127	Spirodela polyrhiza strain 9509 chromosome 19 sequence	K11253	H3	histone H3	http://www.genome.jp/dbget-bin/www_bget?ko:K11253	P68430	670	3.3e-69	Histone H3.2 OS=Onobrychis viciifolia OX=3882 PE=2 SV=2	PF15630//PF00125	CENP-S protein//Core histone H2A/H2B/H3/H4	--	--	GO:0003677	DNA binding	GO:0000786//GO:0071821	nucleosome//FANCM-MHF complex	KOG1745	Histones H3 and H4
Cluster-3890.4799	98.2332	29.2408	1.74796	4.53943e-05	0.00350763	1534	218193727	EEC76154.1	172	1.3e-09	hypothetical protein OsI_13451 [Oryza sativa Indica Group]	--	--	--	--	--	--	--	--	--	Q75KV9	172	4.8e-11	Transcription factor BHLH148 OS=Oryza sativa subsp. japonica OX=39947 GN=BHLH148 PE=1 SV=1	PF00010	Helix-loop-helix DNA-binding domain	--	--	GO:0046983	protein dimerization activity	--	--	--	--
Cluster-3890.2731	3.00991	0.443243	2.74213	4.60098e-05	0.00354322	581	743892714	XP_010911621.1	325	8.7e-28	putative calcium-binding protein CML19 [Elaeis guineensis]	--	--	--	--	--	K13448	CML	calcium-binding protein CML	http://www.genome.jp/dbget-bin/www_bget?ko:K13448	Q9SRE6	259	1.5e-21	Calcium-binding protein CML38 OS=Arabidopsis thaliana OX=3702 GN=CML38 PE=2 SV=1	PF13405//PF00404//PF12763//PF00036//PF10591//PF13499//PF13202	EF-hand domain//Dockerin type I domain//Cytoskeletal-regulatory complex EF hand//EF hand//Secreted protein acidic and rich in cysteine Ca binding region//EF-hand domain pair//EF hand	GO:0000272//GO:0005975	polysaccharide catabolic process//carbohydrate metabolic process	GO:0005515//GO:0005509//GO:0004553	protein binding//calcium ion binding//hydrolase activity, hydrolyzing O-glycosyl compounds	--	--	--	--
Cluster-3890.2038	33.4186	9.62471	1.79501	4.69205e-05	0.00360123	1136	1577028827	RZS26511.1	329	5.8e-28	hypothetical protein BHM03_00059861 [Ensete ventricosum]	--	--	--	--	--	--	--	--	--	Q9C7W2	215	3.7e-16	Ethylene-responsive transcription factor ERF061 OS=Arabidopsis thaliana OX=3702 GN=ERF061 PE=2 SV=1	PF00847	AP2 domain	GO:0006355	regulation of transcription, DNA-templated	GO:0003700	DNA-binding transcription factor activity	GO:0005667	transcription regulator complex	--	--
Cluster-3890.16599	1.71995	7.47182	-2.11407	4.73929e-05	0.00362532	1299	672184142	XP_008812373.1	1109	2.4e-118	uncharacterized protein LOC103723273 [Phoenix dactylifera]	XM_020741800.1	XM_020741800	76	1.02696e-29	PREDICTED: Phalaenopsis equestris uncharacterized LOC110037209 (LOC110037209), mRNA	--	--	--	--	Q65XS5	384	1.1e-35	Glycosyltransferase BC10 OS=Oryza sativa subsp. japonica OX=39947 GN=BC10 PE=1 SV=1	PF02485	Core-2/I-Branching enzyme	--	--	--	--	GO:0016020	membrane	--	--
Cluster-1014.0	1.16711	0	7.2358	4.77659e-05	0.00364167	662	--	--	--	--	--	--	--	--	--	--	--	--	--	--	--	--	--	--	--	--	--	--	--	--	--	--	--	--
Cluster-3890.5323	20.0251	67.4996	-1.75267	4.87044e-05	0.00370089	530	672143627	XP_008795696.1	479	1.1e-45	uncharacterized protein LOC103711363 [Phoenix dactylifera]	--	--	--	--	--	--	--	--	--	--	--	--	--	PF13202//PF13499//PF10591//PF00036//PF13405	EF hand//EF-hand domain pair//Secreted protein acidic and rich in cysteine Ca binding region//EF hand//EF-hand domain	--	--	GO:0005509	calcium ion binding	--	--	--	--
Cluster-3890.3620	49.94	165.52	-1.72858	4.89198e-05	0.00370494	1798	1228865195	XP_021988339.1	804	7.7e-83	serine decarboxylase 1 [Helianthus annuus]	--	--	--	--	--	K01590	hdc, HDC	histidine decarboxylase	http://www.genome.jp/dbget-bin/www_bget?ko:K01590	Q6ESZ9	788	2.1e-82	Serine decarboxylase 1 OS=Oryza sativa subsp. japonica OX=39947 GN=SDC1 PE=3 SV=1	PF12679//PF00282	ABC-2 family transporter protein//Pyridoxal-dependent decarboxylase conserved domain	GO:0055085//GO:0019752	transmembrane transport//carboxylic acid metabolic process	GO:0016831//GO:0030170	carboxy-lyase activity//pyridoxal phosphate binding	--	--	--	--
Cluster-3627.0	0.368561	2.72278	-2.85904	4.98313e-05	0.00373685	889	731429145	XP_010664559.1	366	2.3e-32	PREDICTED: uncharacterized protein LOC100267848 [Vitis vinifera]	--	--	--	--	--	--	--	--	--	--	--	--	--	PF00622	SPRY domain	--	--	GO:0005515	protein binding	--	--	--	--
Cluster-3890.16427	2.64135	10.3846	-1.97192	4.98177e-05	0.00373685	740	720014705	XP_010260591.1	152	1.3e-07	PREDICTED: prosaposin-like [Nelumbo nucifera]	--	--	--	--	--	K12382	PSAP, SGP1	saposin	http://www.genome.jp/dbget-bin/www_bget?ko:K12382	--	--	--	--	--	--	--	--	--	--	--	--	--	--
Cluster-3890.17311	0.0614268	1.51969	-4.46379	4.95961e-05	0.00373685	439	--	--	--	--	--	--	--	--	--	--	--	--	--	--	--	--	--	--	--	--	--	--	--	--	--	--	--	--
Cluster-3890.8136	98.5901	323.824	-1.71562	5.04492e-05	0.00377083	605	1255117702	XP_022635597.1	635	1e-63	histone H3-like centromeric protein CSE4 [Vigna radiata var. radiata]	XM_003575046.4	XM_003575046	281	5.11154e-144	PREDICTED: Brachypodium distachyon histone H3.2 (LOC100826679), mRNA	K11253	H3	histone H3	http://www.genome.jp/dbget-bin/www_bget?ko:K11253	P68427	627	3.3e-64	Histone H3.2 OS=Pisum sativum OX=3888 PE=1 SV=2	PF15630//PF00125	CENP-S protein//Core histone H2A/H2B/H3/H4	--	--	GO:0003677	DNA binding	GO:0071821//GO:0000786	FANCM-MHF complex//nucleosome	KOG1745	Histones H3 and H4
Cluster-3890.15168	44.1045	12.9807	1.76395	5.32221e-05	0.00396513	955	1371491276	PSR87700.1	573	2.5e-56	UPF0301 protein like [Actinidia chinensis var. chinensis]	--	--	--	--	--	K07735	algH	putative transcriptional regulator	http://www.genome.jp/dbget-bin/www_bget?ko:K07735	--	--	--	--	--	--	--	--	--	--	--	--	--	--
Cluster-3890.5928	3.6291	0.644602	2.47888	5.36019e-05	0.00398046	1211	222629295	EEE61427.1	422	1e-38	hypothetical protein OsJ_15639 [Oryza sativa Japonica Group]	AK334282.1	AK334282	62	5.79189e-22	Triticum aestivum cDNA, clone: WT009_D23, cultivar: Chinese Spring	--	--	--	--	Q7XN54	422	3.9e-40	Probable metal-nicotianamine transporter YSL16 OS=Oryza sativa subsp. japonica OX=39947 GN=YSL16 PE=2 SV=2	--	--	--	--	--	--	--	--	--	--
Cluster-3890.12709	61.9182	202.641	-1.71036	5.52469e-05	0.00408934	3181	1052193487	XP_017700795.1	1303	1.9e-140	subtilisin-like protease SBT3.9 [Phoenix dactylifera]	--	--	--	--	--	--	--	--	--	Q9SZY2	1009	8.8e-108	Subtilisin-like protease SBT3.7 OS=Arabidopsis thaliana OX=3702 GN=SBT3.7 PE=3 SV=2	PF00082	Subtilase family	GO:0006508	proteolysis	GO:0004252	serine-type endopeptidase activity	--	--	--	--
Cluster-1370.0	0.245707	2.27954	-3.1736	5.69854e-05	0.00420442	1106	697144207	XP_009626217.1	367	2.2e-32	PREDICTED: uncharacterized protein LOC104116959 isoform X2 [Nicotiana tomentosiformis]	--	--	--	--	--	--	--	--	--	--	--	--	--	PF15151//PF08513	Response gene to complement 32 protein family//LisH	GO:0051726	regulation of cell cycle	GO:0005515	protein binding	--	--	--	--
Cluster-1435.0	0.429988	2.91274	-2.73795	5.81712e-05	0.0042644	492	--	--	--	--	--	--	--	--	--	--	--	--	--	--	--	--	--	--	PF12270	Cytochrome c oxidase subunit IV	GO:0006123//GO:0055114	mitochondrial electron transport, cytochrome c to oxygen//oxidation-reduction process	GO:0004129	cytochrome-c oxidase activity	GO:0045277//GO:0016021	respiratory chain complex IV//integral component of membrane	--	--
Cluster-3890.3813	8.65995	29.8885	-1.78624	5.81547e-05	0.0042644	1800	1102283107	OIT30500.1	266	1.9e-20	gdsl esteraselipase [Nicotiana attenuata]	--	--	--	--	--	--	--	--	--	Q9LZB2	218	2.6e-16	GDSL esterase/lipase At5g03980 OS=Arabidopsis thaliana OX=3702 GN=At5g03980 PE=2 SV=1	PF04644//PF00657	Motilin/ghrelin//GDSL-like Lipase/Acylhydrolase	GO:0007165	signal transduction	GO:0005179//GO:0016788	hormone activity//hydrolase activity, acting on ester bonds	GO:0005576	extracellular region	--	--
Cluster-3890.9405	542.153	167.293	1.69628	5.90747e-05	0.00431679	2849	743774366	XP_010917534.1	1633	9.1e-179	cytochrome P450 78A4 [Elaeis guineensis]	XM_006397795.2	XM_006397795	39	8.44562e-09	PREDICTED: Eutrema salsugineum cytochrome P450 78A6 (LOC18015761), mRNA	--	--	--	--	O65012	1200	5.6e-130	Cytochrome P450 78A4 OS=Pinus radiata OX=3347 GN=CYP78A4 PE=2 SV=1	PF00067	Cytochrome P450	GO:0055114	oxidation-reduction process	GO:0016705//GO:0020037//GO:0005506	oxidoreductase activity, acting on paired donors, with incorporation or reduction of molecular oxygen//heme binding//iron ion binding	--	--	--	--
Cluster-3890.14051	2.26788	8.96808	-1.97976	6.01269e-05	0.00437969	1804	1572871911	RZB64384.1	418	4.4e-38	Ferredoxin--NADP reductase, root isozyme, chloroplastic isoform A [Glycine soja]	CP025667.1	CP025667	95	3.93458e-40	Ipomoea triloba cultivar NCNSP0323 chromosome 8	K02641	petH	ferredoxin--NADP+ reductase	http://www.genome.jp/dbget-bin/www_bget?ko:K02641	O23877	394	1e-36	Ferredoxin--NADP reductase, embryo isozyme, chloroplastic OS=Oryza sativa subsp. japonica OX=39947 GN=Os07g0147900 PE=1 SV=1	PF05407//PF02229	Rubella virus endopeptidase//Transcriptional Coactivator p15 (PC4)	GO:0006508//GO:0006355//GO:0006144	proteolysis//regulation of transcription, DNA-templated//purine nucleobase metabolic process	GO:0003677//GO:0004197//GO:0003968//GO:0017111	DNA binding//cysteine-type endopeptidase activity//RNA-directed 5'-3' RNA polymerase activity//nucleoside-triphosphatase activity	GO:0031379	RNA-directed RNA polymerase complex	--	--
Cluster-3890.13858	8.78404	30.2039	-1.78087	6.05904e-05	0.00439944	1109	1492103248	XP_026665645.1	932	6.8e-98	syntaxin-related protein KNOLLE isoform X1 [Phoenix dactylifera]	XM_010039901.2	XM_010039901	56	1.14517e-18	PREDICTED: Eucalyptus grandis syntaxin-related protein KNOLLE (LOC104426753), mRNA	K08486	STX1B_2_3	syntaxin 1B/2/3	http://www.genome.jp/dbget-bin/www_bget?ko:K08486	Q42374	780	1.1e-81	Syntaxin-related protein KNOLLE OS=Arabidopsis thaliana OX=3702 GN=KN PE=1 SV=1	PF00957//PF00804//PF00015	Synaptobrevin//Syntaxin//Methyl-accepting chemotaxis protein (MCP) signalling domain	GO:0016192//GO:0007165	vesicle-mediated transport//signal transduction	--	--	GO:0016020//GO:0016021	membrane//integral component of membrane	--	--
Cluster-3890.10106	65.965	19.8826	1.7298	6.0921e-05	0.00440944	2412	720042458	XP_010269244.1	943	7.9e-99	PREDICTED: uncharacterized protein LOC104605971 [Nelumbo nucifera]	XM_010655543.2	XM_010655543	36	3.31937e-07	PREDICTED: Vitis vinifera uncharacterized LOC100250413 (LOC100250413), transcript variant X3, mRNA	--	--	--	--	Q9C9R6	870	8.7e-92	Putative pumilio homolog 7, chloroplastic OS=Arabidopsis thaliana OX=3702 GN=APUM7 PE=3 SV=2	PF08144//PF00806	CPL (NUC119) domain//Pumilio-family RNA binding repeat	--	--	GO:0003723	RNA binding	--	--	KOG2049	Translational repressor MPT5/PUF4 and related RNA-binding proteins (Puf superfamily)
Cluster-3890.13697	9.1526	2.27954	2.00174	6.15526e-05	0.00444111	602	--	--	--	--	--	--	--	--	--	--	--	--	--	--	--	--	--	--	--	--	--	--	--	--	--	--	--	--
Cluster-3890.9684	87.1647	26.5313	1.71575	6.19998e-05	0.00445931	1340	1102703583	OIW02607.1	1109	2.5e-118	hypothetical protein TanjilG_24058 [Lupinus angustifolius]	CP019097.1	CP019097	226	4.37374e-113	Spirodela polyrhiza strain 9509 chromosome 5 sequence	--	--	--	--	Q9LZW4	1044	3.2e-112	CBL-interacting serine/threonine-protein kinase 14 OS=Arabidopsis thaliana OX=3702 GN=CIPK14 PE=1 SV=1	PF03822//PF00069//PF07714	NAF domain//Protein kinase domain//Protein tyrosine and serine/threonine kinase	GO:0007165//GO:0006468	signal transduction//protein phosphorylation	GO:0005524//GO:0004672	ATP binding//protein kinase activity	--	--	--	--
Cluster-3890.13050	113.608	34.7572	1.70845	6.24926e-05	0.00448066	588	1175884444	XP_020595895.1	418	1.4e-38	uncharacterized protein LOC110035905 [Phalaenopsis equestris]	--	--	--	--	--	--	--	--	--	--	--	--	--	--	--	--	--	--	--	--	--	--	--
Cluster-3890.10210	154.796	47.5537	1.70257	6.35083e-05	0.00453926	762	1557845394	RWR72782.1	235	3.1e-17	poly polymerase [Cinnamomum micranthum f. kanehirae]	--	--	--	--	--	--	--	--	--	--	--	--	--	--	--	--	--	--	--	--	--	--	--
Cluster-3890.13700	0.368561	2.65946	-2.82519	6.40322e-05	0.00456244	1178	1150747012	XP_020247647.1	1074	2.5e-114	GDSL esterase/lipase At1g71691-like [Asparagus officinalis]	CP019096.1	CP019096	91	4.26059e-38	Spirodela polyrhiza strain 9509 chromosome 4 sequence	--	--	--	--	Q9FVV1	701	1.7e-72	GDSL esterase/lipase At1g71250 OS=Arabidopsis thaliana OX=3702 GN=At1g71250 PE=2 SV=1	PF00657	GDSL-like Lipase/Acylhydrolase	--	--	GO:0016788	hydrolase activity, acting on ester bonds	--	--	--	--
Cluster-3890.7100	70.5794	227.51	-1.6885	6.71583e-05	0.00477032	563	--	--	--	--	--	--	--	--	--	--	--	--	--	--	--	--	--	--	--	--	--	--	--	--	--	--	--	--
Cluster-3890.17313	0.798549	4.17915	-2.37643	6.83045e-05	0.00483672	525	1102736916	XP_019052721.1	201	1.9e-13	PREDICTED: cysteine proteinase inhibitor 1-like [Nelumbo nucifera]	CP019096.1	CP019096	107	2.34051e-47	Spirodela polyrhiza strain 9509 chromosome 4 sequence	--	--	--	--	P86472	183	8.7e-13	Cysteine proteinase inhibitor 1 OS=Actinidia chinensis var. chinensis OX=1590841 GN=CYT1 PE=1 SV=2	PF16845//PF00031	Aspartic acid proteinase inhibitor//Cystatin domain	--	--	GO:0004869	cysteine-type endopeptidase inhibitor activity	--	--	--	--
Cluster-3890.17352	1.5971	6.83861	-2.09287	6.85169e-05	0.00483679	1591	1201314131	OVA13860.1	584	2.2e-57	Plant peroxidase [Macleaya cordata]	CP019093.1	CP019093	155	1.53249e-73	Spirodela polyrhiza strain 9509 chromosome 1 sequence	K00430	E1.11.1.7	peroxidase	http://www.genome.jp/dbget-bin/www_bget?ko:K00430	Q9SZB9	493	3e-48	Peroxidase 47 OS=Arabidopsis thaliana OX=3702 GN=PER47 PE=2 SV=2	PF00141	Peroxidase	GO:0006804//GO:0055114//GO:0006979	obsolete peroxidase reaction//oxidation-reduction process//response to oxidative stress	GO:0004601//GO:0020037	peroxidase activity//heme binding	--	--	--	--
Cluster-3890.16444	1.65852	7.02857	-2.07817	7.0544e-05	0.00493554	1552	1293598994	PKA61852.1	898	8.4e-94	hypothetical protein AXF42_Ash008684 [Apostasia shenzhenica]	XM_023883260.1	XM_023883260	48	4.52679e-14	PREDICTED: Lactuca sativa SUN domain-containing protein 1-like (LOC111887034), mRNA	K19347	SUN1_2	SUN domain-containing protein 1/2	http://www.genome.jp/dbget-bin/www_bget?ko:K19347	Q9FF75	718	2.4e-74	SUN domain-containing protein 1 OS=Arabidopsis thaliana OX=3702 GN=SUN1 PE=1 SV=1	PF06705//PF07926//PF04799//PF07352//PF07743//PF04513//PF03938//PF10392//PF06825//PF16331//PF01442	SF-assemblin/beta giardin//TPR/MLP1/MLP2-like protein//fzo-like conserved region//Bacteriophage Mu Gam like protein//HSCB C-terminal oligomerisation domain//Baculovirus polyhedron envelope protein, PEP, C terminus//Outer membrane protein (OmpH-like)//Golgi transport complex subunit 5//Heat shock factor binding protein 1//TolA binding protein trimerisation//Apolipoprotein A1/A4/E domain	GO:0051259//GO:0006869//GO:0006891//GO:0042157//GO:0042262//GO:0070206//GO:0008053//GO:0006606	protein complex oligomerization//lipid transport//intra-Golgi vesicle-mediated transport//lipoprotein metabolic process//DNA protection//protein trimerization//mitochondrial fusion//protein import into nucleus	GO:0005200//GO:0005198//GO:0003714//GO:0051082//GO:0003690//GO:0008289//GO:0003924	structural constituent of cytoskeleton//structural molecule activity//transcription corepressor activity//unfolded protein binding//double-stranded DNA binding//lipid binding//GTPase activity	GO:0005576//GO:0019028//GO:0017119//GO:0016021//GO:0005667//GO:0005856//GO:0019031//GO:0005741	extracellular region//viral capsid//Golgi transport complex//integral component of membrane//transcription regulator complex//cytoskeleton//viral envelope//mitochondrial outer membrane	KOG2687	Spindle pole body protein, contains UNC-84 domain
Cluster-3890.1696	2.19048	8.66477	-1.98009	7.03043e-05	0.00493554	510	848905301	XP_012852140.1	383	1.4e-34	PREDICTED: cytochrome P450 704C1-like [Erythranthe guttata]	--	--	--	--	--	--	--	--	--	Q50EK3	319	1.4e-28	Cytochrome P450 704C1 OS=Pinus taeda OX=3352 GN=CYP704C1 PE=2 SV=1	PF00067	Cytochrome P450	GO:0055114	oxidation-reduction process	GO:0016705//GO:0020037//GO:0005506	oxidoreductase activity, acting on paired donors, with incorporation or reduction of molecular oxygen//heme binding//iron ion binding	--	--	--	--
Cluster-4602.0	7.86263	1.89961	2.04483	7.05632e-05	0.00493554	742	--	--	--	--	--	--	--	--	--	--	--	--	--	--	--	--	--	--	PF00960	Neocarzinostatin family	GO:0006952	defense response	GO:0003677	DNA binding	--	--	--	--
Cluster-3890.12919	5.58984	1.26641	2.13522	7.13929e-05	0.00496322	1002	1562558449	XP_015073201.2	165	5.3e-09	uncharacterized protein DDB_G0290685-like [Solanum pennellii]	--	--	--	--	--	--	--	--	--	Q01033	129	3e-06	Uncharacterized gene 48 protein OS=Saimiriine herpesvirus 2 (strain 11) OX=10383 GN=48 PE=3 SV=1	--	--	--	--	--	--	--	--	--	--
Cluster-3890.13451	1.22854	5.63552	-2.19048	7.13929e-05	0.00496322	515	--	--	--	--	--	--	--	--	--	--	--	--	--	--	--	--	--	--	--	--	--	--	--	--	--	--	--	--

## Sheet: KEGG
Category	ID	Description	GeneRatio	BgRatio	pvalue	padj	Count	geneID
KEGG	ko00940	Phenylpropanoid biosynthesis	16|68	89|3545	3.35479e-12	2.48255e-10	16	Cluster-3890.16365|Cluster-3890.4601|Cluster-3890.3113|Cluster-3890.17352|Cluster-3890.16774|Cluster-3890.700|Cluster-3890.16238|Cluster-3890.5326|Cluster-3890.153|Cluster-3890.365|Cluster-3890.6120|Cluster-3890.12230|Cluster-3890.725|Cluster-3890.5237|Cluster-3890.541|Cluster-3890.11469
KEGG	ko00941	Flavonoid biosynthesis	5|68	13|3545	6.10101e-06	0.000225737	5	Cluster-3890.13290|Cluster-3890.12230|Cluster-3890.126|Cluster-3890.541|Cluster-3890.5237
KEGG	ko00196	Photosynthesis - antenna proteins	4|68	16|3545	0.000223614	0.00551581	4	Cluster-3890.8346|Cluster-3890.6903|Cluster-3890.7857|Cluster-3890.6821
KEGG	ko00945	Stilbenoid, diarylheptanoid and gingerol biosynthesis	3|68	9|3545	0.000734256	0.0135837	3	Cluster-3890.12230|Cluster-3890.541|Cluster-3890.5237
KEGG	ko00360	Phenylalanine metabolism	3|68	21|3545	0.00589844	0.0817426	3	Cluster-3890.12230|Cluster-3890.700|Cluster-3890.16238
KEGG	ko05322	Systemic lupus erythematosus	3|68	22|3545	0.00662778	0.0817426	3	Cluster-3890.14152|Cluster-3890.8136|Cluster-3890.12441
KEGG	ko00130	Ubiquinone and other terpenoid-quinone biosynthesis	3|68	27|3545	0.0110607	0.116928	3	Cluster-3890.12230|Cluster-3890.700|Cluster-3890.16238
KEGG	ko04626	Plant-pathogen interaction	6|68	129|3545	0.0185588	0.160076	6	Cluster-3890.15102|Cluster-3890.2731|Cluster-3890.7149|Cluster-3890.6461|Cluster-23.0|Cluster-3890.10345
KEGG	ko00950	Isoquinoline alkaloid biosynthesis	2|68	12|3545	0.0194688	0.160076	2	Cluster-3890.12111|Cluster-3890.3675
KEGG	ko05034	Alcoholism	3|68	37|3545	0.024072	0.178133	3	Cluster-3890.14152|Cluster-3890.8136|Cluster-3890.12441
KEGG	ko00904	Diterpenoid biosynthesis	2|68	15|3545	0.0282286	0.189901	2	Cluster-3890.9004|Cluster-3890.16066
KEGG	ko00944	Flavone and flavonol biosynthesis	1|68	1|3545	0.0310244	0.191317	1	Cluster-3890.126
KEGG	ko00910	Nitrogen metabolism	2|68	19|3545	0.0418712	0.22781	2	Cluster-3890.6688|Cluster-3890.15971
KEGG	ko00350	Tyrosine metabolism	2|68	20|3545	0.0455993	0.22781	2	Cluster-3890.12111|Cluster-3890.3675
KEGG	ko01220	Degradation of aromatic compounds	1|68	2|3545	0.0461776	0.22781	1	Cluster-3890.12230
KEGG	ko05202	Transcriptional misregulation in cancer	2|68	24|3545	0.0616431	0.261596	2	Cluster-3890.14152|Cluster-3890.8136
KEGG	ko00592	alpha-Linolenic acid metabolism	2|68	24|3545	0.0616431	0.261596	2	Cluster-3890.4989|Cluster-3890.17455
KEGG	ko00906	Carotenoid biosynthesis	2|68	25|3545	0.0659152	0.261596	2	Cluster-3890.10012|Cluster-3890.16375
KEGG	ko00410	beta-Alanine metabolism	2|68	26|3545	0.0702835	0.261596	2	Cluster-3890.16579|Cluster-3890.3338
KEGG	ko04075	Plant hormone signal transduction	5|68	137|3545	0.0707017	0.261596	5	Cluster-23.0|Cluster-3890.7149|Cluster-3890.10345|Cluster-3890.15102|Cluster-3890.8706
KEGG	ko04975	Fat digestion and absorption	1|68	4|3545	0.0757845	0.26705	1	Cluster-3890.8032
KEGG	ko00430	Taurine and hypotaurine metabolism	1|68	7|3545	0.118499	0.397711	1	Cluster-3890.8735
KEGG	ko00280	Valine, leucine and isoleucine degradation	2|68	37|3545	0.123613	0.397711	2	Cluster-3890.16579|Cluster-3890.6699
KEGG	ko00250	Alanine, aspartate and glutamate metabolism	2|68	40|3545	0.139482	0.430069	2	Cluster-3890.13720|Cluster-3890.8762
KEGG	ko00073	Cutin, suberine and wax biosynthesis	1|68	12|3545	0.185392	0.54876	1	Cluster-3890.16380
KEGG	ko00561	Glycerolipid metabolism	2|68	51|3545	0.200691	0.571197	2	Cluster-3890.8032|Cluster-3890.16581
KEGG	ko00040	Pentose and glucuronate interconversions	2|68	53|3545	0.212165	0.58149	2	Cluster-3890.9976|Cluster-3890.9975
KEGG	ko00450	Selenocompound metabolism	1|68	15|3545	0.223091	0.589599	1	Cluster-3890.11619
KEGG	ko04142	Lysosome	2|68	57|3545	0.235292	0.600401	2	Cluster-3890.5466|Cluster-3890.16427
KEGG	ko00650	Butanoate metabolism	1|68	17|3545	0.24726	0.609909	1	Cluster-3890.13720
KEGG	ko00340	Histidine metabolism	1|68	19|3545	0.270686	0.646153	1	Cluster-3890.3620
KEGG	ko00640	Propanoate metabolism	1|68	22|3545	0.304478	0.64937	1	Cluster-3890.16579
KEGG	ko05145	Toxoplasmosis	2|68	70|3545	0.31093	0.64937	2	Cluster-4061.0|Cluster-3890.6461
KEGG	ko00982	Drug metabolism - cytochrome P450	1|68	23|3545	0.315394	0.64937	1	Cluster-2934.1
KEGG	ko03320	PPAR signaling pathway	1|68	25|3545	0.336721	0.64937	1	Cluster-3890.4989
KEGG	ko04130	SNARE interactions in vesicular transport	1|68	25|3545	0.336721	0.64937	1	Cluster-3890.13858
KEGG	ko00220	Arginine biosynthesis	1|68	28|3545	0.367485	0.64937	1	Cluster-3890.8762
KEGG	ko04612	Antigen processing and presentation	1|68	30|3545	0.387206	0.64937	1	Cluster-3890.5466
KEGG	ko00071	Fatty acid degradation	1|68	30|3545	0.387206	0.64937	1	Cluster-3890.4989
KEGG	ko00520	Amino sugar and nucleotide sugar metabolism	2|68	84|3545	0.390651	0.64937	2	Cluster-3890.5549|Cluster-3890.17412
KEGG	ko00400	Phenylalanine, tyrosine and tryptophan biosynthesis	1|68	31|3545	0.396837	0.64937	1	Cluster-3890.16885
KEGG	ko00051	Fructose and mannose metabolism	1|68	32|3545	0.406318	0.64937	1	Cluster-3890.17412
KEGG	ko00053	Ascorbate and aldarate metabolism	1|68	33|3545	0.415652	0.64937	1	Cluster-3890.3553
KEGG	ko01040	Biosynthesis of unsaturated fatty acids	1|68	34|3545	0.424841	0.64937	1	Cluster-3890.4989
KEGG	ko04024	cAMP signaling pathway	1|68	36|3545	0.442792	0.64937	1	Cluster-3890.4989
KEGG	ko04721	Synaptic vesicle cycle	1|68	36|3545	0.442792	0.64937	1	Cluster-3890.13858
KEGG	ko01210	2-Oxocarboxylic acid metabolism	1|68	36|3545	0.442792	0.64937	1	Cluster-3890.8762
KEGG	ko02024	Quorum sensing	1|68	37|3545	0.451559	0.64937	1	Cluster-3890.16885
KEGG	ko00030	Pentose phosphate pathway	1|68	37|3545	0.451559	0.64937	1	Cluster-3890.9743
KEGG	ko04712	Circadian rhythm - plant	1|68	38|3545	0.460189	0.64937	1	Cluster-3890.13290
KEGG	ko00860	Porphyrin and chlorophyll metabolism	1|68	38|3545	0.460189	0.64937	1	Cluster-3890.10457
KEGG	ko05140	Leishmaniasis	1|68	42|3545	0.493387	0.64937	1	Cluster-4061.0
KEGG	ko00330	Arginine and proline metabolism	1|68	43|3545	0.501365	0.64937	1	Cluster-3890.3338
KEGG	ko00562	Inositol phosphate metabolism	1|68	43|3545	0.501365	0.64937	1	Cluster-3890.3553
KEGG	ko04620	Toll-like receptor signaling pathway	1|68	46|3545	0.524564	0.64937	1	Cluster-4061.0
KEGG	ko00195	Photosynthesis	1|68	46|3545	0.524564	0.64937	1	Cluster-3890.14051
KEGG	ko00260	Glycine, serine and threonine metabolism	1|68	46|3545	0.524564	0.64937	1	Cluster-3890.8762
KEGG	ko01200	Carbon metabolism	3|68	176|3545	0.534587	0.64937	3	Cluster-3890.8762|Cluster-3890.16579|Cluster-3890.9743
KEGG	ko05133	Pertussis	1|68	49|3545	0.546694	0.64937	1	Cluster-4061.0
KEGG	ko00270	Cysteine and methionine metabolism	1|68	50|3545	0.553842	0.64937	1	Cluster-3890.11619
KEGG	ko00480	Glutathione metabolism	1|68	51|3545	0.560879	0.64937	1	Cluster-3890.9743
KEGG	ko05142	Chagas disease (American trypanosomiasis)	1|68	52|3545	0.567805	0.64937	1	Cluster-4061.0
KEGG	ko04064	NF-kappa B signaling pathway	1|68	54|3545	0.581336	0.64937	1	Cluster-4061.0
KEGG	ko00500	Starch and sucrose metabolism	2|68	122|3545	0.581949	0.64937	2	Cluster-3890.9976|Cluster-3890.9975
KEGG	ko00630	Glyoxylate and dicarboxylate metabolism	1|68	55|3545	0.587943	0.64937	1	Cluster-3890.8762
KEGG	ko04910	Insulin signaling pathway	1|68	55|3545	0.587943	0.64937	1	Cluster-3890.14696
KEGG	ko00710	Carbon fixation in photosynthetic organisms	1|68	55|3545	0.587943	0.64937	1	Cluster-3890.8762
KEGG	ko04146	Peroxisome	1|68	59|3545	0.613357	0.657804	1	Cluster-3890.4989
KEGG	ko01212	Fatty acid metabolism	1|68	59|3545	0.613357	0.657804	1	Cluster-3890.4989
KEGG	ko05162	Measles	1|68	65|3545	0.648599	0.681796	1	Cluster-4061.0
KEGG	ko04722	Neurotrophin signaling pathway	1|68	66|3545	0.654156	0.681796	1	Cluster-4061.0
KEGG	ko05164	Influenza A	1|68	73|3545	0.690691	0.709877	1	Cluster-4061.0
KEGG	ko05152	Tuberculosis	1|68	82|3545	0.732107	0.73236	1	Cluster-4061.0
KEGG	ko01230	Biosynthesis of amino acids	2|68	162|3545	0.73236	0.73236	2	Cluster-3890.8762|Cluster-3890.16885

## Sheet: GO
Category	ID	Description	GeneRatio	BgRatio	pvalue	padj	Count	geneID
MF	GO:0016491	oxidoreductase activity	51|177	1078|9614	6.5063e-11	5.8557e-09	51	Cluster-2934.1,Cluster-3890.5339,Cluster-3890.4601,Cluster-3890.2061,Cluster-3890.10457,Cluster-3890.5326,Cluster-3890.752,Cluster-1749.0,Cluster-3890.755,Cluster-3890.9743,Cluster-3890.13411,Cluster-3890.15217,Cluster-3890.6120,Cluster-3890.153,Cluster-3890.4989,Cluster-3890.16375,Cluster-3890.17352,Cluster-3890.16774,Cluster-3890.12111,Cluster-4369.0,Cluster-3890.17069,Cluster-3890.3553,Cluster…
BP	GO:0040007	growth	12|177	60|9614	3.7855e-09	1.7035e-07	12	Cluster-3890.7754,Cluster-3890.5980,Cluster-3890.11141,Cluster-3890.1955,Cluster-3890.12404,Cluster-3890.15028,Cluster-3890.15874,Cluster-3890.16447,Cluster-3890.11492,Cluster-3890.6164,Cluster-3890.2305,Cluster-3890.2418
BP	GO:0006950	response to stress	31|177	627|9614	2.9485e-07	8.8455e-06	31	Cluster-3890.7754,Cluster-3890.4601,Cluster-3890.3149,Cluster-3890.12404,Cluster-3890.5326,Cluster-3890.16447,Cluster-3890.16444,Cluster-4602.0,Cluster-3890.153,Cluster-3890.11141,Cluster-3890.17352,Cluster-3890.16774,Cluster-3890.8406,Cluster-3890.15835,Cluster-3890.15874,Cluster-3890.5762,Cluster-3890.15028,Cluster-3890.14903,Cluster-3890.11492,Cluster-3890.4563,Cluster-3890.2305,Cluster-3890.1…
MF	GO:0016798	hydrolase activity, acting on glycosyl bonds	10|177	282|9614	0.020989	0.47225	10	Cluster-3890.2731,Cluster-3890.15122,Cluster-3890.12219,Cluster-3890.4353,Cluster-3890.6192,Cluster-3890.5549,Cluster-3890.47,Cluster-3890.9807,Cluster-3890.16721,Cluster-3890.15121
MF	GO:0003700	DNA-binding transcription factor activity	13|177	388|9614	0.039445	0.71001	13	Cluster-3890.8901,Cluster-3890.3208,Cluster-3890.6914,Cluster-3890.365,Cluster-3890.15835,Cluster-3890.13290,Cluster-3890.10027,Cluster-3890.585,Cluster-3890.8706,Cluster-3890.5553,Cluster-3890.7365,Cluster-3890.13793,Cluster-3890.2038
MF	GO:0008233	peptidase activity	14|177	507|9614	0.057869	0.78376	14	Cluster-3890.5466,Cluster-3890.1492,Cluster-3890.12938,Cluster-3890.9378,Cluster-3890.13708,Cluster-3890.14860,Cluster-3890.12709,Cluster-3890.4563,Cluster-3890.14903,Cluster-3890.14051,Cluster-1059.0,Cluster-3890.16569,Cluster-3890.16581,Cluster-3890.14443
BP	GO:0005975	carbohydrate metabolic process	14|177	550|9614	0.064613	0.78376	14	Cluster-3890.7857,Cluster-3890.15122,Cluster-3890.8346,Cluster-3890.12219,Cluster-3890.4353,Cluster-3890.6192,Cluster-3890.3553,Cluster-3890.47,Cluster-3890.2731,Cluster-3890.9743,Cluster-3890.9807,Cluster-3890.9975,Cluster-3890.16721,Cluster-3890.15121
MF	GO:0016829	lyase activity	7|177	207|9614	0.069668	0.78376	7	Cluster-3890.2012,Cluster-3890.5779,Cluster-3890.3620,Cluster-3890.11619,Cluster-3890.16066,Cluster-3890.11593,Cluster-3890.3675
BP	GO:0055085	transmembrane transport	15|177	630|9614	0.099632	0.96534	15	Cluster-3890.1571,Cluster-3890.3208,Cluster-352.0,Cluster-3890.16375,Cluster-3890.6744,Cluster-3890.6946,Cluster-3890.365,Cluster-3890.740,Cluster-3611.0,Cluster-3890.16721,Cluster-3890.3620,Cluster-3890.3830,Cluster-3890.14182,Cluster-3890.15971,Cluster-3890.8735
MF	GO:0008289	lipid binding	3|177	71|9614	0.10726	0.96534	3	Cluster-3890.16689,Cluster-3890.16444,Cluster-3890.17024
MF	GO:0030674	protein binding, bridging	1|177	8|9614	0.12908	1	1	Cluster-3890.6192
BP	GO:0051276	chromosome organization	6|177	249|9614	0.22263	1	6	Cluster-3890.3208,Cluster-3890.4353,Cluster-3890.5018,Cluster-3890.10275,Cluster-3890.12441,Cluster-3890.16689
BP	GO:0006520	cellular amino acid metabolic process	10|177	478|9614	0.23244	1	10	Cluster-3890.12111,Cluster-3890.13708,Cluster-3890.11619,Cluster-3890.16885,Cluster-3890.9378,Cluster-3890.11593,Cluster-3890.9743,Cluster-3890.9978,Cluster-3890.16579,Cluster-3890.15217
BP	GO:0009056	catabolic process	11|177	498|9614	0.26836	1	11	Cluster-3890.7857,Cluster-3890.2012,Cluster-3890.5779,Cluster-3890.8346,Cluster-3890.4353,Cluster-3890.3153,Cluster-3890.5549,Cluster-3890.3553,Cluster-3890.9743,Cluster-3890.16579,Cluster-3890.2731
MF	GO:0016757	transferase activity, transferring glycosyl groups	6|177	266|9614	0.28129	1	6	Cluster-3890.6567,Cluster-3890.3153,Cluster-3890.4424,Cluster-3890.15176,Cluster-3890.5237,Cluster-3890.16581
MF	GO:0016746	transferase activity, transferring acyl groups	6|177	246|9614	0.28318	1	6	Cluster-3890.16380,Cluster-3890.13708,Cluster-3890.8032,Cluster-3890.13290,Cluster-3890.9378,Cluster-3890.541
BP	GO:0044281	small molecule metabolic process	23|177	1223|9614	0.28435	1	23	Cluster-3890.7857,Cluster-3890.16885,Cluster-3890.13290,Cluster-3890.3675,Cluster-3890.9743,Cluster-3890.15217,Cluster-3890.16375,Cluster-3890.12111,Cluster-3890.3553,Cluster-3890.4883,Cluster-3890.12715,Cluster-3890.14051,Cluster-3890.3620,Cluster-3890.13708,Cluster-3890.9978,Cluster-3890.9378,Cluster-3890.11593,Cluster-3890.16579,Cluster-3890.14443,Cluster-1435.0,Cluster-3890.8346,Cluster-3890.…
BP	GO:0000902	cell morphogenesis	1|177	17|9614	0.29604	1	1	Cluster-2613.0
CC	GO:0005794	Golgi apparatus	2|177	81|9614	0.31626	1	2	Cluster-3890.16721,Cluster-3890.16444
MF	GO:0016853	isomerase activity	4|177	168|9614	0.3183	1	4	Cluster-3890.8346,Cluster-3890.4353,Cluster-3890.7857,Cluster-3890.16306
CC	GO:0005773	vacuole	1|177	31|9614	0.34536	1	1	Cluster-3890.3208
MF	GO:0022857	transmembrane transporter activity	14|177	731|9614	0.36024	1	14	Cluster-1435.0,Cluster-3890.1571,Cluster-3890.3208,Cluster-352.0,Cluster-3890.16375,Cluster-3890.6744,Cluster-3890.6946,Cluster-3890.6821,Cluster-3890.740,Cluster-3890.16721,Cluster-3890.3830,Cluster-3890.14182,Cluster-3890.15971,Cluster-3890.8735
BP	GO:0007155	cell adhesion	2|177	76|9614	0.37571	1	2	Cluster-3890.153,Cluster-3890.7855
MF	GO:0008092	cytoskeletal protein binding	3|177	147|9614	0.38182	1	3	Cluster-3890.11593,Cluster-3890.6192,Cluster-3890.153
BP	GO:0030154	cell differentiation	2|177	73|9614	0.38541	1	2	Cluster-2613.0,Cluster-3890.12441
CC	GO:0005576	extracellular region	8|177	392|9614	0.38763	1	8	Cluster-3890.11141,Cluster-3890.14903,Cluster-3890.15835,Cluster-3890.3813,Cluster-3890.16496,Cluster-3890.16444,Cluster-3890.16689,Cluster-3890.17024
MF	GO:0004518	nuclease activity	4|177	198|9614	0.39848	1	4	Cluster-3890.3153,Cluster-3890.6164,Cluster-3890.3208,Cluster-3890.5018
BP	GO:0140014	mitotic nuclear division	1|177	35|9614	0.41386	1	1	Cluster-3890.16774
MF	GO:0016779	nucleotidyltransferase activity	4|177	211|9614	0.4277	1	4	Cluster-3890.11928,Cluster-3890.12715,Cluster-3890.14051,Cluster-3890.14443
MF	GO:0051082	unfolded protein binding	2|177	75|9614	0.4324	1	2	Cluster-3890.16444,Cluster-3890.16885
BP	GO:0071554	cell wall organization or biogenesis	2|177	86|9614	0.43827	1	2	Cluster-3890.9975,Cluster-3890.5549
MF	GO:0030234	enzyme regulator activity	5|177	233|9614	0.44973	1	5	Cluster-3890.17313,Cluster-3890.16627,Cluster-3890.16352,Cluster-3890.6407,Cluster-3890.16500
BP	GO:0042592	homeostatic process	4|177	186|9614	0.46024	1	4	Cluster-1749.0,Cluster-3890.13411,Cluster-352.0,Cluster-4369.0
BP	GO:0006790	sulfur compound metabolic process	2|177	88|9614	0.47341	1	2	Cluster-3890.11619,Cluster-3890.9978
CC	GO:0005829	cytosol	1|177	42|9614	0.48289	1	1	Cluster-3890.13290
MF	GO:0016765	transferase activity, transferring alkyl or aryl (other than methyl) groups	1|177	42|9614	0.51765	1	1	Cluster-3890.16885
CC	GO:0005856	cytoskeleton	4|177	233|9614	0.52796	1	4	Cluster-3890.16444,Cluster-3890.11593,Cluster-3890.13835,Cluster-2.0
CC	GO:0005654	nucleoplasm	3|177	175|9614	0.54237	1	3	Cluster-3890.14152,Cluster-3890.10275,Cluster-3890.8136
BP	GO:0006810	transport	28|177	1694|9614	0.56822	1	28	Cluster-3890.1571,Cluster-3890.3208,Cluster-352.0,Cluster-3890.14696,Cluster-3890.2521,Cluster-3890.6946,Cluster-3890.16444,Cluster-3890.9743,Cluster-3890.16689,Cluster-3890.14182,Cluster-3890.16375,Cluster-3890.6744,Cluster-3890.8332,Cluster-3890.4883,Cluster-3890.15971,Cluster-3890.3620,Cluster-3890.740,Cluster-3611.0,Cluster-3890.3830,Cluster-3890.16579,Cluster-3890.17024,Cluster-2236.0,Cluste…
BP	GO:0006913	nucleocytoplasmic transport	1|177	60|9614	0.58923	1	1	Cluster-3890.16444
MF	GO:0043167	ion binding	48|177	3079|9614	0.59529	1	48	Cluster-2934.1,Cluster-3890.2061,Cluster-3890.5779,Cluster-3890.5323,Cluster-3890.12993,Cluster-3890.11223,Cluster-3890.6461,Cluster-3890.16885,Cluster-3890.752,Cluster-3890.17069,Cluster-3890.5305,Cluster-3890.755,Cluster-1738.0,Cluster-3890.9684,Cluster-3890.7857,Cluster-3890.4989,Cluster-3890.14980,Cluster-3890.16066,Cluster-3890.4353,Cluster-3890.3553,Cluster-3890.9405,Cluster-3890.9978,Clust…
BP	GO:0000278	mitotic cell cycle	1|177	54|9614	0.60041	1	1	Cluster-3890.16774
BP	GO:0007005	mitochondrion organization	1|177	56|9614	0.6222	1	1	Cluster-3890.16444
BP	GO:0019748	secondary metabolic process	1|177	48|9614	0.62309	1	1	Cluster-3890.3153
BP	GO:0061024	membrane organization	1|177	52|9614	0.62646	1	1	Cluster-3890.10275
MF	GO:0008168	methyltransferase activity	4|177	256|9614	0.66247	1	4	Cluster-3890.6536,Cluster-3890.12715,Cluster-3890.14903,Cluster-3890.9978
BP	GO:0048856	anatomical structure development	3|177	187|9614	0.67623	1	3	Cluster-2613.0,Cluster-3890.14980,Cluster-3890.12441
CC	GO:0009579	thylakoid	2|177	115|9614	0.67988	1	2	Cluster-1749.0,Cluster-3890.5305
BP	GO:0006457	protein folding	1|177	61|9614	0.6912	1	1	Cluster-3890.16885
BP	GO:0008219	cell death	1|177	71|9614	0.69556	1	1	Cluster-3890.11141
CC	GO:0005783	endoplasmic reticulum	3|177	200|9614	0.71404	1	3	Cluster-3890.4563,Cluster-3890.16721,Cluster-3890.16885
BP	GO:0015979	photosynthesis	2|177	136|9614	0.74743	1	2	Cluster-3890.752,Cluster-3890.5305
BP	GO:0002376	immune system process	1|177	79|9614	0.74922	1	1	Cluster-3890.15835
CC	GO:0031410	cytoplasmic vesicle	1|177	86|9614	0.75142	1	1	Cluster-2236.0
CC	GO:0005739	mitochondrion	3|177	241|9614	0.82067	1	3	Cluster-3890.7365,Cluster-3890.16444,Cluster-3890.7857
BP	GO:0040011	locomotion	1|177	103|9614	0.84614	1	1	Cluster-2613.0
BP	GO:0051604	protein maturation	1|177	106|9614	0.85924	1	1	Cluster-3890.4563
BP	GO:0007049	cell cycle	2|177	189|9614	0.86754	1	2	Cluster-3890.16774,Cluster-1370.0
BP	GO:0034655	nucleobase-containing compound catabolic process	1|177	128|9614	0.8793	1	1	Cluster-3890.3153
BP	GO:0006629	lipid metabolic process	6|177	518|9614	0.88391	1	6	Cluster-3890.9866,Cluster-3890.17069,Cluster-3890.13290,Cluster-3890.9743,Cluster-3890.15217,Cluster-3890.16581
BP	GO:0006397	mRNA processing	1|177	134|9614	0.89277	1	1	Cluster-3890.12715
MF	GO:0016887	ATPase activity	3|177	354|9614	0.89601	1	3	Cluster-3890.3208,Cluster-3890.7857,Cluster-3890.4353
BP	GO:0006091	generation of precursor metabolites and energy	2|177	241|9614	0.89741	1	2	Cluster-1435.0,Cluster-3890.4883
BP	GO:0016192	vesicle-mediated transport	3|177	345|9614	0.90367	1	3	Cluster-3890.13858,Cluster-3890.16444,Cluster-3890.14696
CC	GO:0005886	plasma membrane	2|177	228|9614	0.91259	1	2	Cluster-3890.6821,Cluster-3890.8735
BP	GO:0065003	protein-containing complex assembly	2|177	234|9614	0.91816	1	2	Cluster-2236.0,Cluster-3890.16444
MF	GO:0005198	structural molecule activity	6|177	511|9614	0.9344	1	6	Cluster-2236.0,Cluster-3890.8901,Cluster-3890.11123,Cluster-3890.16444,Cluster-3890.13270,Cluster-3890.7365
BP	GO:0000003	reproduction	1|177	161|9614	0.93974	1	1	Cluster-3890.12441
CC	GO:0005694	chromosome	3|177	393|9614	0.96257	1	3	Cluster-3890.14152,Cluster-3890.8136,Cluster-3890.12441
MF	GO:0016301	kinase activity	6|177	840|9614	0.97547	1	6	Cluster-2236.0,Cluster-3890.12993,Cluster-3890.13270,Cluster-4061.0,Cluster-1738.0,Cluster-3890.9684
MF	GO:0003924	GTPase activity	1|177	256|9614	0.97844	1	1	Cluster-3890.16444
BP	GO:0022607	cellular component assembly	2|177	320|9614	0.98137	1	2	Cluster-2236.0,Cluster-3890.16444
BP	GO:0007165	signal transduction	5|177	640|9614	0.98584	1	5	Cluster-3890.8706,Cluster-3890.3813,Cluster-3890.13858,Cluster-3890.9684,Cluster-3890.16359
BP	GO:0006464	cellular protein modification process	10|177	1168|9614	0.98809	1	10	Cluster-2236.0,Cluster-3890.14980,Cluster-3890.12993,Cluster-3890.11223,Cluster-3890.13270,Cluster-3890.10275,Cluster-3890.6517,Cluster-4061.0,Cluster-1738.0,Cluster-3890.9684
BP	GO:0042254	ribosome biogenesis	3|177	410|9614	0.99153	1	3	Cluster-3890.8901,Cluster-3890.7365,Cluster-3890.16581
MF	GO:0003735	structural constituent of ribosome	2|177	322|9614	0.99248	1	2	Cluster-3890.8901,Cluster-3890.7365
CC	GO:0032991	protein-containing complex	32|177	2546|9614	0.99419	1	32	Cluster-3890.3208,Cluster-3890.7857,Cluster-3890.14696,Cluster-3890.11223,Cluster-3890.12441,Cluster-3890.13290,Cluster-1749.0,Cluster-3890.5305,Cluster-3890.16444,Cluster-3890.5553,Cluster-3890.13793,Cluster-3890.6914,Cluster-3890.16375,Cluster-3890.14152,Cluster-3890.15835,Cluster-3890.10027,Cluster-3890.8136,Cluster-3890.8706,Cluster-3890.12715,Cluster-3890.7365,Cluster-3890.14051,Cluster-3890…
MF	GO:0003723	RNA binding	3|177	545|9614	0.99524	1	3	Cluster-3890.8626,Cluster-3890.725,Cluster-3890.10106
BP	GO:0006259	DNA metabolic process	6|177	855|9614	0.99652	1	6	Cluster-3890.3208,Cluster-3890.3153,Cluster-3890.14903,Cluster-3890.4353,Cluster-3890.5018,Cluster-3890.16444
BP	GO:0044403	symbiont process	1|177	318|9614	0.99674	1	1	Cluster-3890.1732
MF	GO:0003677	DNA binding	12|177	1352|9614	0.9973	1	12	Cluster-3890.16444,Cluster-3890.14152,Cluster-3890.14903,Cluster-3890.12441,Cluster-3890.4328,Cluster-4602.0,Cluster-3890.8136,Cluster-3890.8706,Cluster-3890.6164,Cluster-3890.4353,Cluster-3890.16689,Cluster-3890.14051
CC	GO:0005737	cytoplasm	14|177	1431|9614	0.998	1	14	Cluster-2236.0,Cluster-3890.8901,Cluster-3890.3208,Cluster-3890.7857,Cluster-3890.12938,Cluster-3890.14696,Cluster-3890.16885,Cluster-3890.13290,Cluster-3890.3553,Cluster-3890.16444,Cluster-3890.4563,Cluster-3890.10275,Cluster-3890.7365,Cluster-3890.16721
CC	GO:0005634	nucleus	9|177	1123|9614	0.99842	1	9	Cluster-3890.14980,Cluster-3890.16774,Cluster-3890.14152,Cluster-3890.11223,Cluster-3890.752,Cluster-3890.8136,Cluster-3890.8706,Cluster-3890.10275,Cluster-3890.16689
CC	GO:0005840	ribosome	2|177	419|9614	0.99857	1	2	Cluster-3890.8901,Cluster-3890.7365
CC	GO:0005622	intracellular	41|177	3266|9614	0.99872	1	41	Cluster-3890.3208,Cluster-3890.7857,Cluster-3890.14696,Cluster-3890.11223,Cluster-3890.12441,Cluster-3890.13290,Cluster-3890.752,Cluster-1749.0,Cluster-3890.5305,Cluster-3890.16444,Cluster-3890.5553,Cluster-3890.16689,Cluster-3890.6914,Cluster-3890.16375,Cluster-3890.12938,Cluster-3890.16774,Cluster-3890.15835,Cluster-3890.10027,Cluster-3890.3553,Cluster-3890.8136,Cluster-3890.8706,Cluster-3890.1…
BP	GO:0015031	protein transport	1|177	488|9614	0.99947	1	1	Cluster-3890.16444
BP	GO:0009058	biosynthetic process	33|177	2864|9614	0.99969	1	33	Cluster-3890.3208,Cluster-3890.7857,Cluster-3890.16885,Cluster-3890.13290,Cluster-3890.9743,Cluster-3890.15217,Cluster-3890.5553,Cluster-3890.13793,Cluster-3890.11928,Cluster-3890.6914,Cluster-3890.16375,Cluster-3890.12938,Cluster-3890.17069,Cluster-3890.15835,Cluster-3890.10027,Cluster-3890.9978,Cluster-3890.8706,Cluster-3890.7365,Cluster-3890.14051,Cluster-3890.8901,Cluster-3890.9866,Cluster-38…
BP	GO:0006412	translation	1|177	522|9614	0.99997	1	1	Cluster-3890.8901
CC	GO:0043226	organelle	22|177	2433|9614	0.99998	1	22	Cluster-3890.3208,Cluster-3890.7857,Cluster-3890.11223,Cluster-3890.12441,Cluster-3890.752,Cluster-3890.16444,Cluster-3890.16689,Cluster-3890.14980,Cluster-3890.16774,Cluster-3890.8136,Cluster-3890.8706,Cluster-3890.7365,Cluster-3890.8901,Cluster-3890.13835,Cluster-3890.11593,Cluster-3890.4563,Cluster-3890.16885,Cluster-2236.0,Cluster-2.0,Cluster-3890.14152,Cluster-3890.10275,Cluster-3890.16721
BP	GO:0034641	cellular nitrogen compound metabolic process	32|177	3327|9614	1	1	32	Cluster-3890.3208,Cluster-3890.7857,Cluster-3890.16885,Cluster-3890.13290,Cluster-3890.16444,Cluster-3890.9743,Cluster-3890.15217,Cluster-3890.5553,Cluster-3890.4353,Cluster-3890.13793,Cluster-3890.6914,Cluster-3890.16375,Cluster-3890.12938,Cluster-3890.15835,Cluster-3890.10027,Cluster-3890.4883,Cluster-3890.8706,Cluster-3890.12715,Cluster-3890.7365,Cluster-3890.14051,Cluster-3890.8901,Cluster-38…
